# Supplementary material for: Variation in the Drought Tolerance of Tropical Understory Plant Communities across an Extreme Elevation and Precipitation Gradient
Source: Preprints.org preprint supplement (doi:10.20944/preprints202306.1933.v1), 2023-06-27
Supplement: Supplementary file 1 [file supplementary]

## Sheet: Data
#	Plot_Code	Plot_Longitude (o)	Plot_Latitude (o)	Plot_Elevation	Plot_Slope	Plot_Habitat	Plot_MAP	Individual_Code	Individual_Height	Individual_BasalDiameter	Individual_DBH	Individual_Family	Individual_Genus	Individual_Species	Individual_Type	TLP (MPa)	SWC (g)	Osmotic (MPa)	RWC (%)	Elasticity (MPa)	CFT (MPa-1)	CTLP (MPa-1)	Gmin (mmol m-2 s-1)	SL (%)
1	1	-71.63	-13.096	3604	76.31	gallery forest	1043.99	1	3	2.5	2.3	Melastomataceae	Brachyotum	Brachyotum_sp1	shrub	-0.886	3.459	-0.348	83.72	5.33	0.094	0.107	33.493	58.988
2	1	-71.63	-13.096	3604	76.31	gallery forest	1043.99	2	4.5	3.5	1.9	Polygalaceae	Monnina	Monnina_densecomata	shrub	-0.573	3.583	-0.409	94.778	33.125	0.071	0.147	47.459	43.782
3	1	-71.63	-13.096	3604	76.31	gallery forest	1043.99	3	7	2.7	2.7	Solanaceae	Sessea	Sessea_dependens	sapling	-1.349	3.732	-0.83	83.705	16.368	0.049	0.175	28.887	26.766
4	1	-71.63	-13.096	3604	76.31	gallery forest	1043.99	4	1.9	1.8	1.1	Melastomataceae	Miconia	Miconia_sp12	shrub	NA	NA	NA	NA	NA	NA	NA	17.988	30.92
5	1	-71.63	-13.096	3604	76.31	gallery forest	1043.99	5	3	1.8	1.1	Solanaceae	Sessea	Sessea_dependens	sapling	-0.785	5.769	-0.444	92.105	9.397	0.066	0.12	14.165	21.524
6	2	-71.63	-13.097	3569	26.8	gallery forest	1366.9	6	1.8	1.8	1	Symplocaceae	Symplocos	Symplocos_baehnii	sapling	NA	NA	NA	NA	NA	NA	NA	5.187	36.908
7	2	-71.63	-13.097	3569	26.8	gallery forest	1366.9	7	6	3.8	3.2	Melastomataceae	Miconia	Miconia_sp12	shrub	NA	NA	NA	NA	NA	NA	NA	NA	32.892
8	2	-71.63	-13.097	3569	26.8	gallery forest	1366.9	8	3	3.3	1.7	Melastomataceae	Miconia	Miconia_sp12	shrub	NA	NA	NA	NA	NA	NA	NA	NA	36.395
9	2	-71.63	-13.097	3569	26.8	gallery forest	1366.9	9	2.5	2.5	1.7	Melastomataceae	Miconia	Miconia_sp15	shrub	NA	NA	NA	NA	NA	NA	NA	8.328	27.859
10	2	-71.63	-13.097	3569	26.8	gallery forest	1366.9	10	3	2	1.4	Symplocaceae	Symplocos	Symplocos_baehnii	sapling	NA	NA	NA	NA	NA	NA	NA	NA	28.678
11	2	-71.63	-13.097	3569	26.8	gallery forest	1366.9	11	3	2.2	1.6	Symplocaceae	Symplocos	Symplocos_baehnii	sapling	-1.195	3.157	-0.867	91.114	23.01	0.036	0.189	12.685	42.801
12	2	-71.63	-13.097	3569	26.8	gallery forest	1366.9	11a	1.5	1.5	0.5	Symplocaceae	Symplocos	Symplocos_baehnii	sapling	NA	NA	NA	NA	NA	NA	NA	NA	NA
13	2	-71.63	-13.097	3569	26.8	gallery forest	1366.9	11b	1.6	1.3	0.7	Symplocaceae	Symplocos	Symplocos_baehnii	sapling	NA	NA	NA	NA	NA	NA	NA	NA	NA
14	2	-71.63	-13.097	3569	26.8	gallery forest	1366.9	11c	1.3	1.4	0.5	Symplocaceae	Symplocos	Symplocos_baehnii	sapling	NA	NA	NA	NA	NA	NA	NA	NA	NA
15	2	-71.63	-13.097	3569	26.8	gallery forest	1366.9	11d	1.5	1	0.6	Symplocaceae	Symplocos	Symplocos_baehnii	sapling	NA	NA	NA	NA	NA	NA	NA	NA	NA
16	2	-71.63	-13.097	3569	26.8	gallery forest	1366.9	11e	1.4	1.3	0.9	Symplocaceae	Symplocos	Symplocos_baehnii	sapling	NA	NA	NA	NA	NA	NA	NA	NA	NA
17	2	-71.63	-13.097	3569	26.8	gallery forest	1366.9	11f	1.5	1.5	1.1	Melastomataceae	Miconia	Miconia_sp15	shrub	-1.249	4.108	-0.449	83.021	33.2	0.023	0.055	NA	NA
18	2	-71.63	-13.097	3569	26.8	gallery forest	1366.9	11g	1.9	1	0.7	Campanulaceae	Centropogon	Centropogon_sp1 WFR 4890	shrub	-1.109	10.606	-0.299	83.903	8.027	0.064	0.048	NA	NA
19	3	-71.63	-13.103	3603	29.91	gallery forest	1053.56	12	1.8	2.2	1.2	Melastomataceae	Miconia	Miconia_sp3	shrub	-0.845	2.488	-0.482	93.979	6.329	0.083	0.059	6.8	30.753
20	3	-71.63	-13.103	3603	29.91	gallery forest	1053.56	13	3.6	2	1.6	Solanaceae	Sessea	Sessea_dependens	sapling	-0.913	4.857	-0.595	88.287	12.507	0.063	0.25	6.795	26.436
21	3	-71.63	-13.103	3603	29.91	gallery forest	1053.56	14	4.5	2.6	2.1	Melastomataceae	Miconia	Miconia_bullata	shrub	NA	NA	NA	NA	NA	NA	NA	7.588	37.868
22	3	-71.63	-13.103	3603	29.91	gallery forest	1053.56	15	2.6	1.5	0.9	Melastomataceae	Miconia	Miconia_sp39	shrub	-0.316	2.822	-0.238	97.985	7.485	0.089	0.085	NA	18.435
23	4	-71.629	-13.103	3592	33.17	gallery forest	1157.44	16	4.5	1.8	1.1	Solanaceae	Sessea	Sessea_dependens	sapling	NA	NA	NA	NA	NA	NA	NA	NA	45.604
24	4	-71.629	-13.103	3592	33.17	gallery forest	1157.44	17	4	2.5	1.6	Solanaceae	Sessea	Sessea_dependens	sapling	NA	NA	NA	NA	NA	NA	NA	NA	40.847
25	4	-71.629	-13.103	3592	33.17	gallery forest	1157.44	18	3	1.1	0.7	Solanaceae	Sessea	Sessea_dependens	sapling	NA	NA	NA	NA	NA	NA	NA	NA	30.171
26	4	-71.629	-13.103	3592	33.17	gallery forest	1157.44	19	6	2.5	2	Solanaceae	Sessea	Sessea_dependens	sapling	-1.011	4.42	-0.472	83.134	10.777	0.063	0.122	NA	25
27	4	-71.629	-13.103	3592	33.17	gallery forest	1157.44	20	5.5	1.4	1.3	Solanaceae	Sessea	Sessea_dependens	sapling	NA	NA	NA	NA	NA	NA	NA	NA	30.92
28	4	-71.629	-13.103	3592	33.17	gallery forest	1157.44	21	3.5	1.4	1	Solanaceae	Sessea	Sessea_dependens	sapling	NA	NA	NA	NA	NA	NA	NA	NA	16.66
29	4	-71.629	-13.103	3592	33.17	gallery forest	1157.44	22	6	2.2	1.6	Solanaceae	Sessea	Sessea_dependens	sapling	-1.036	8.242	-0.46	81.204	27.084	0.036	0.142	4.18	24.079
30	4	-71.629	-13.103	3592	33.17	gallery forest	1157.44	22a	3.4	3.5	1.5	Solanaceae	Sessea	Sessea_dependens	sapling	NA	NA	NA	NA	NA	NA	NA	NA	NA
31	4	-71.629	-13.103	3592	33.17	gallery forest	1157.44	22b	3.7	3.1	2.3	Solanaceae	Saracha	Saracha_punctata	sapling	-1.313	4.729	-0.576	78.183	9.898	0.062	0.154	NA	NA
32	5	-71.625	-13.114	3548	30.08	gallery forest	1549.25	23	1.5	1.6	0.8	Melastomataceae	Miconia	Miconia_sp47	shrub	NA	NA	NA	NA	NA	NA	NA	NA	56.203
33	5	-71.625	-13.114	3548	30.08	gallery forest	1549.25	24	3	2.1	1.5	Melastomataceae	Miconia	Miconia_sp47	shrub	NA	NA	NA	NA	NA	NA	NA	NA	56.403
34	5	-71.625	-13.114	3548	30.08	gallery forest	1549.25	25	5	2.4	1.9	NA	NA	morphospecie_5_25	sapling	NA	NA	NA	NA	NA	NA	NA	NA	46.799
35	5	-71.625	-13.114	3548	30.08	gallery forest	1549.25	26	5	1.3	1.3	NA	NA	morphospecie_5_26	sapling	NA	NA	NA	NA	NA	NA	NA	NA	58.849
36	5	-71.625	-13.114	3548	30.08	gallery forest	1549.25	27	2.6	2.4	1.4	Melastomataceae	Miconia	Miconia_sp48	shrub	NA	NA	NA	NA	NA	NA	NA	NA	52.569
37	5	-71.625	-13.114	3548	30.08	gallery forest	1549.25	28	1.2	1.8	NA	Melastomataceae	Miconia	Miconia_sp48	shrub	NA	NA	NA	NA	NA	NA	NA	NA	41.765
38	5	-71.625	-13.114	3548	30.08	gallery forest	1549.25	29	3.5	1.3	0.9	Solanaceae	NA	Solanaceae_5_29	sapling	NA	NA	NA	NA	NA	NA	NA	NA	57.436
39	5	-71.625	-13.114	3548	30.08	gallery forest	1549.25	30	2	1.2	1	NA	NA	morphospecie_5_30	sapling	NA	NA	NA	NA	NA	NA	NA	NA	57.557
40	5	-71.625	-13.114	3548	30.08	gallery forest	1549.25	31	2.5	1.5	1	Melastomataceae	NA	Melastomataceae_5_31	shrub	NA	NA	NA	NA	NA	NA	NA	NA	54.738
41	6	-71.626	-13.113	3562	27.88	gallery forest	1428.61	32	3.8	2	1.1	NA	NA	morphospecie_6_32	sapling	NA	NA	NA	NA	NA	NA	NA	NA	46.015
42	6	-71.626	-13.113	3562	27.88	gallery forest	1428.61	33	1.8	2	1.8	Solanaceae	NA	Solanaceae_6_33	sapling	NA	NA	NA	NA	NA	NA	NA	NA	39.94
43	6	-71.626	-13.113	3562	27.88	gallery forest	1428.61	34	1.3	1.2	NA	Melastomataceae	Miconia	Miconia_sp49	shrub	NA	NA	NA	NA	NA	NA	NA	NA	38.881
44	6	-71.626	-13.113	3562	27.88	gallery forest	1428.61	35	1	1.1	NA	Melastomataceae	Miconia	Miconia_sp50	shrub	NA	NA	NA	NA	NA	NA	NA	NA	44.989
45	6	-71.626	-13.113	3562	27.88	gallery forest	1428.61	36	3.5	1.6	1.1	Solanaceae	NA	Solanaceae_6_33	sapling	NA	NA	NA	NA	NA	NA	NA	NA	46.923
46	6	-71.626	-13.113	3562	27.88	gallery forest	1428.61	37	3.5	1.7	1.3	Solanaceae	NA	Solanaceae_6_33	sapling	NA	NA	NA	NA	NA	NA	NA	NA	36.31
47	6	-71.626	-13.113	3562	27.88	gallery forest	1428.61	38	3.7	2.4	2	Symplocaceae	Symplocos	Symplocos_baehnii	sapling	NA	NA	NA	NA	NA	NA	NA	NA	39.207
48	6	-71.626	-13.113	3562	27.88	gallery forest	1428.61	39	2.8	1.8	1.1	Melastomataceae	Miconia	Miconia_sp49	shrub	NA	NA	NA	NA	NA	NA	NA	NA	38.414
49	6	-71.626	-13.113	3562	27.88	gallery forest	1428.61	40	2	1	0.9	Solanaceae	NA	Solanaceae_6_33	sapling	NA	NA	NA	NA	NA	NA	NA	NA	38.898
50	7	-71.628	-13.103	3615	21.15	gallery forest	937.43	41	2.5	1.5	1	Solanaceae	NA	Solanaceae_7_41	sapling	NA	NA	NA	NA	NA	NA	NA	NA	69.924
51	7	-71.628	-13.103	3615	21.15	gallery forest	937.43	42	2	1	0.6	Solanaceae	NA	Solanaceae_7_41	sapling	NA	NA	NA	NA	NA	NA	NA	NA	32.863
52	7	-71.628	-13.103	3615	21.15	gallery forest	937.43	43	3	1.3	1.1	Solanaceae	NA	Solanaceae_7_41	sapling	NA	NA	NA	NA	NA	NA	NA	NA	NA
53	7	-71.628	-13.103	3615	21.15	gallery forest	937.43	44	3.5	1.9	1.3	Solanaceae	NA	Solanaceae_7_41	sapling	NA	NA	NA	NA	NA	NA	NA	NA	50.011
54	7	-71.628	-13.103	3615	21.15	gallery forest	937.43	45	2.5	1.7	1.1	Solanaceae	NA	Solanaceae_7_41	sapling	NA	NA	NA	NA	NA	NA	NA	NA	43.255
55	7	-71.628	-13.103	3615	21.15	gallery forest	937.43	46	1.5	1.6	0.6	Campanulaceae	Centropogon	Centropogon_sp2	shrub	NA	NA	NA	NA	NA	NA	NA	NA	62.309
56	7	-71.628	-13.103	3615	21.15	gallery forest	937.43	47	1.5	1.7	1.2	Symplocaceae	Symplocos	Symplocos_sp1	sapling	NA	NA	NA	NA	NA	NA	NA	NA	76.263
57	8	-71.603	-13.11	3172	19.13	cloud forest	3653.51	48	3	1.4	1.1	Rubiaceae	Faramea	Faramea_candelabrum	sapling	-0.375	4.504	-0.375	95.358	7.672	0.13	Inf	32.751	45.319
58	8	-71.603	-13.11	3172	19.13	cloud forest	3653.51	49	3	1	1.1	Rubiaceae	Faramea	Faramea_candelabrum	sapling	NA	NA	NA	NA	NA	NA	NA	NA	44.1
59	8	-71.603	-13.11	3172	19.13	cloud forest	3653.51	50	1.4	1.1	1.1	Melastomataceae	Miconia	Miconia_sp51	shrub	NA	NA	NA	NA	NA	NA	NA	70.658	31.163
60	8	-71.603	-13.11	3172	19.13	cloud forest	3653.51	51	1.6	1	0.4	Clusiaceae	Clusia	Clusia_candelabrum	sapling	NA	NA	NA	NA	NA	NA	NA	NA	43.522
61	8	-71.603	-13.11	3172	19.13	cloud forest	3653.51	52	2	1.9	1	Melastomataceae	Miconia	Miconia_sp10	shrub	-0.543	3.748	-0.296	94.652	8.502	0.073	0.094	NA	55.887
62	8	-71.603	-13.11	3172	19.13	cloud forest	3653.51	53	1.5	1.6	0.7	Melastomataceae	Miconia	Miconia_sp3	shrub	-0.344	5.356	-0.18	93.627	4.022	0.154	0.089	NA	71.023
63	8	-71.603	-13.11	3172	19.13	cloud forest	3653.51	54	1.5	1.2	NA	Melastomataceae	Miconia	Miconia_sp11	shrub	-0.41	6.074	-0.164	93.499	46.892	0.018	0.048	26.136	64.639
64	8	-71.603	-13.11	3172	19.13	cloud forest	3653.51	55	1.8	1.2	0.9	Melastomataceae	Miconia	Miconia_sp10	shrub	NA	NA	NA	NA	NA	NA	NA	23.302	62.895
65	8	-71.603	-13.11	3172	19.13	cloud forest	3653.51	56	1.5	1	NA	Melastomataceae	Miconia	Miconia_sp11	shrub	NA	NA	NA	NA	NA	NA	NA	NA	47.291
66	8	-71.603	-13.11	3172	19.13	cloud forest	3653.51	56a	2	1.8	1	Melastomataceae	Axinaea	Axinaea_pennellii	shrub	-0.526	3.712	-0.269	88.639	26.909	0.046	0.19	NA	NA
67	8	-71.603	-13.11	3172	19.13	cloud forest	3653.51	56b	2.5	3.5	1.7	Araliaceae	Oreopanax	Oreopanax_sp1	sapling	-0.632	10.014	-0.333	93.722	8.717	0.065	0.069	35.983	NA
68	8	-71.603	-13.11	3172	19.13	cloud forest	3653.51	56c	1.6	1.4	0.6	Rubiaceae	Faramea	Faramea_af candelabrum	sapling	-0.557	4.301	-0.406	88.281	8.057	0.104	0.479	NA	NA
69	9	-71.604	-13.11	3214	25.93	cloud forest	3506.95	57	1.5	1	0.7	Campanulaceae	Centropogon	Centropogon_sp1	shrub	-0.389	13.521	-0.159	94.175	7.057	0.076	0.05	35.384	69.034
70	9	-71.604	-13.11	3214	25.93	cloud forest	3506.95	58	2	1.3	0.5	Melastomataceae	Miconia	Miconia_sp3	shrub	-0.462	6.506	-0.163	93.384	9.059	0.062	0.045	21.792	62.432
71	9	-71.604	-13.11	3214	25.93	cloud forest	3506.95	59	3.5	2.5	1.5	Melastomataceae	Axinaea	Axinaea_pennellii	shrub	-0.8	6.002	-0.17	85.868	13.661	0.047	0.033	29.401	29.897
72	10	-71.607	-13.114	3366	26.16	cloud forest	2811.81	60	1.3	1.1	NA	Rubiaceae	Palicourea	Palicourea_sp6	sapling	NA	NA	NA	NA	NA	NA	NA	7.58	45.933
73	10	-71.607	-13.114	3366	26.16	cloud forest	2811.81	61	1.8	1.2	0.9	Rubiaceae	Palicourea	Palicourea_sp6	sapling	NA	NA	NA	NA	NA	NA	NA	NA	43.861
74	10	-71.607	-13.114	3366	26.16	cloud forest	2811.81	62	2.5	2.2	1.6	Gentianaceae	Macrocarpaea	Macrocarpaea_maguirei	shrub	NA	NA	NA	NA	NA	NA	NA	NA	49.366
75	10	-71.607	-13.114	3366	26.16	cloud forest	2811.81	63	1	1	NA	Gentianaceae	Macrocarpaea	Macrocarpaea_maguirei	shrub	NA	NA	NA	NA	NA	NA	NA	NA	52.117
76	10	-71.607	-13.114	3366	26.16	cloud forest	2811.81	64	1.8	1.5	1	Gentianaceae	Macrocarpaea	Macrocarpaea_maguirei	shrub	NA	NA	NA	NA	NA	NA	NA	NA	36.218
77	10	-71.607	-13.114	3366	26.16	cloud forest	2811.81	65	1.5	1	0.4	Rubiaceae	Palicourea	Palicourea_sp6	sapling	-0.756	6.124	-0.335	90.58	13.894	0.051	0.071	10.879	47.864
78	10	-71.607	-13.114	3366	26.16	cloud forest	2811.81	66	1.8	1.5	1	Gentianaceae	Macrocarpaea	Macrocarpaea_maguirei	shrub	NA	NA	NA	NA	NA	NA	NA	NA	51.634
79	10	-71.607	-13.114	3366	26.16	cloud forest	2811.81	67	1.3	1	NA	Rubiaceae	Palicourea	Palicourea_sp6	sapling	NA	NA	NA	NA	NA	NA	NA	NA	52.917
80	10	-71.607	-13.114	3366	26.16	cloud forest	2811.81	68	2.3	1.7	1.4	Gentianaceae	Macrocarpaea	Macrocarpaea_maguirei	shrub	NA	NA	NA	NA	NA	NA	NA	NA	48.636
81	10	-71.607	-13.114	3366	26.16	cloud forest	2811.81	69	1	1.1	NA	Gentianaceae	Macrocarpaea	Macrocarpaea_maguirei	shrub	-2.047	6.102	-1.052	88.306	103.614	0.008	0.05	19.448	67.408
82	10	-71.607	-13.114	3366	26.16	cloud forest	2811.81	70	2.6	1.4	0.8	Gentianaceae	Macrocarpaea	Macrocarpaea_maguirei	shrub	NA	NA	NA	NA	NA	NA	NA	NA	59.389
83	10	-71.607	-13.114	3366	26.16	cloud forest	2811.81	71	1	1	NA	Gentianaceae	Macrocarpaea	Macrocarpaea_maguirei	shrub	NA	NA	NA	NA	NA	NA	NA	NA	53.215
84	10	-71.607	-13.114	3366	26.16	cloud forest	2811.81	72	1	1	NA	Gentianaceae	Macrocarpaea	Macrocarpaea_maguirei	shrub	-1.087	6.518	-0.462	92.775	21.965	0.027	0.031	33.329	53.908
85	11	-71.607	-13.112	3387	12.23	cloud forest	2692.48	73	1.5	1.7	1.7	Clusiaceae	Clusia	Clusia_sp2	sapling	NA	NA	NA	NA	NA	NA	NA	NA	49.84
86	11	-71.607	-13.112	3387	12.23	cloud forest	2692.48	74	2.8	1.4	1.1	Symplocaceae	Symplocos	Symplocos_sp1	sapling	NA	NA	NA	NA	NA	NA	NA	4.952	26.388
87	11	-71.607	-13.112	3387	12.23	cloud forest	2692.48	75	1.2	1	NA	Clusiaceae	Clusia	Clusia_sp2	sapling	NA	NA	NA	NA	NA	NA	NA	NA	61.233
88	11	-71.607	-13.112	3387	12.23	cloud forest	2692.48	76	2.3	1.3	0.7	Rubiaceae	Palicourea	Palicourea_sp6	sapling	-0.484	4.265	-0.211	91.05	7.005	0.092	0.096	14.499	56.192
89	11	-71.607	-13.112	3387	12.23	cloud forest	2692.48	77	1	1.6	1	Clusiaceae	Clusia	Clusia_sp2	sapling	NA	NA	NA	NA	NA	NA	NA	11.986	54.304
90	11	-71.607	-13.112	3387	12.23	cloud forest	2692.48	78	1.2	1.5	NA	Symplocaceae	Symplocos	Symplocos_quitensis	sapling	-0.867	4.188	-0.296	82.969	14.007	0.079	0.078	25.371	70.927
91	11	-71.607	-13.112	3387	12.23	cloud forest	2692.48	79	1	1.2	NA	Clusiaceae	Clusia	Clusia_sp2	sapling	NA	NA	NA	NA	NA	NA	NA	NA	63.172
92	11	-71.607	-13.112	3387	12.23	cloud forest	2692.48	80	1	1.5	NA	Clusiaceae	Clusia	Clusia_sp2	sapling	NA	NA	NA	NA	NA	NA	NA	12.192	54.674
93	11	-71.607	-13.112	3387	12.23	cloud forest	2692.48	80a	5	0.9	0.9	Primulaceae	Myrsine	Myrsine_dependens	shrub	-1.538	3.099	-0.57	66.075	20.673	0.037	0.122	12.558	NA
94	12	-71.526	-13.033	1189	15.43	sub montane forest	5991.77	81	1.7	2.2	1.1	Rubiaceae	Elaeagia	Elaeagia_sp4	sapling	-0.353	4.875	-0.149	91.616	3.523	0.213	0.093	NA	78.604
95	12	-71.526	-13.033	1189	15.43	sub montane forest	5991.77	82	0.9	1.7	NA	Gesneriaceae	Besleria	Besleria_sp1	shrub	NA	NA	NA	NA	NA	NA	NA	NA	78.615
96	12	-71.526	-13.033	1189	15.43	sub montane forest	5991.77	83	1.8	1.3	0.9	Piperaceae	Piper	Piper_sp1	shrub	NA	NA	NA	NA	NA	NA	NA	17.28	68.892
97	12	-71.526	-13.033	1189	15.43	sub montane forest	5991.77	84	1.5	1.4	0.9	Rubiaceae	NA	Rubiaceae_12_84	sapling	NA	NA	NA	NA	NA	NA	NA	NA	82.152
98	12	-71.526	-13.033	1189	15.43	sub montane forest	5991.77	85	1.6	1.4	0.9	Rubiaceae	Elaeagia	Elaeagia_sp4	sapling	NA	NA	NA	NA	NA	NA	NA	23.322	87.796
99	12	-71.526	-13.033	1189	15.43	sub montane forest	5991.77	86	1.3	1.4	NA	Rubiaceae	Elaeagia	Elaeagia_sp4	sapling	NA	NA	NA	NA	NA	NA	NA	NA	69.082
100	12	-71.526	-13.033	1189	15.43	sub montane forest	5991.77	87	1.6	1.5	1	Gesneriaceae	Besleria	Besleria_sp1	shrub	NA	NA	NA	NA	NA	NA	NA	NA	80.002
101	12	-71.526	-13.033	1189	15.43	sub montane forest	5991.77	88	1.5	1.4	0.8	Gesneriaceae	Besleria	Besleria_sp1	shrub	NA	NA	NA	NA	NA	NA	NA	NA	81.599
102	12	-71.526	-13.033	1189	15.43	sub montane forest	5991.77	89	1.3	1.5	1.1	Gesneriaceae	Besleria	Besleria_sp1	shrub	NA	NA	NA	NA	NA	NA	NA	NA	85.031
103	12	-71.526	-13.033	1189	15.43	sub montane forest	5991.77	90	0.8	1.2	NA	Gesneriaceae	Besleria	Besleria_sp1	shrub	NA	NA	NA	NA	NA	NA	NA	NA	80.93
104	12	-71.526	-13.033	1189	15.43	sub montane forest	5991.77	91	1.5	1.5	0.9	Gesneriaceae	Besleria	Besleria_sp1	shrub	NA	NA	NA	NA	NA	NA	NA	NA	86.164
105	12	-71.526	-13.033	1189	15.43	sub montane forest	5991.77	92	1.2	1.1	NA	Gesneriaceae	Besleria	Besleria_sp1	shrub	NA	NA	NA	NA	NA	NA	NA	NA	85.874
106	12	-71.526	-13.033	1189	15.43	sub montane forest	5991.77	93	1.3	1.1	NA	Piperaceae	Piper	Piper_sp1	shrub	NA	NA	NA	NA	NA	NA	NA	NA	87.425
107	12	-71.526	-13.033	1189	15.43	sub montane forest	5991.77	94	1.7	1.7	1.4	Gesneriaceae	Besleria	Besleria_sp1	shrub	NA	NA	NA	NA	NA	NA	NA	NA	86.608
108	12	-71.526	-13.033	1189	15.43	sub montane forest	5991.77	95	2.1	1.7	1.6	Gesneriaceae	Besleria	Besleria_sp1	shrub	NA	NA	NA	NA	NA	NA	NA	NA	84.201
109	12	-71.526	-13.033	1189	15.43	sub montane forest	5991.77	96	1	1.1	NA	Gesneriaceae	Besleria	Besleria_sp1	shrub	NA	NA	NA	NA	NA	NA	NA	NA	80.314
110	12	-71.526	-13.033	1189	15.43	sub montane forest	5991.77	97	1.4	1.1	1.1	Gesneriaceae	Besleria	Besleria_sp1	shrub	NA	NA	NA	NA	NA	NA	NA	28.364	82.487
111	12	-71.526	-13.033	1189	15.43	sub montane forest	5991.77	98	1.5	1.5	1.2	Gesneriaceae	Besleria	Besleria_sp1	shrub	NA	NA	NA	NA	NA	NA	NA	NA	83.956
112	12	-71.526	-13.033	1189	15.43	sub montane forest	5991.77	99	1.2	1.8	NA	Gesneriaceae	Besleria	Besleria_sp1	shrub	NA	NA	NA	NA	NA	NA	NA	NA	81.641
113	12	-71.526	-13.033	1189	15.43	sub montane forest	5991.77	100	0.8	1.2	NA	Gesneriaceae	Besleria	Besleria_sp1	shrub	NA	NA	NA	NA	NA	NA	NA	NA	85.82
114	12	-71.526	-13.033	1189	15.43	sub montane forest	5991.77	101	1.1	1.2	NA	Gesneriaceae	Besleria	Besleria_sp1	shrub	NA	NA	NA	NA	NA	NA	NA	NA	84.314
115	12	-71.526	-13.033	1189	15.43	sub montane forest	5991.77	102	1	1.3	NA	Gesneriaceae	Besleria	Besleria_sp1	shrub	NA	NA	NA	NA	NA	NA	NA	NA	81.939
116	12	-71.526	-13.033	1189	15.43	sub montane forest	5991.77	103	1.3	1.3	NA	Gesneriaceae	Besleria	Besleria_sp1	shrub	NA	NA	NA	NA	NA	NA	NA	NA	83.911
117	12	-71.526	-13.033	1189	15.43	sub montane forest	5991.77	104	0.9	1	NA	Gesneriaceae	Besleria	Besleria_sp1	shrub	NA	NA	NA	NA	NA	NA	NA	NA	82.02
118	12	-71.526	-13.033	1189	15.43	sub montane forest	5991.77	105	1.4	1.1	NA	Rosaceae	Prunus	Prunus_sp1	sapling	NA	NA	NA	NA	NA	NA	NA	11.065	64.649
119	12	-71.526	-13.033	1189	15.43	sub montane forest	5991.77	105a	3.5	1.2	1	Rubiaceae	Elaeagia	Elaeagia_sp4	sapling	NA	NA	NA	NA	NA	NA	NA	NA	NA
120	12	-71.526	-13.033	1189	15.43	sub montane forest	5991.77	105b	2.5	1	0.6	Rubiaceae	Elaeagia	Elaeagia_sp4	sapling	NA	NA	NA	NA	NA	NA	NA	NA	NA
121	12	-71.526	-13.033	1189	15.43	sub montane forest	5991.77	105c	4.5	1.5	1.1	Rubiaceae	Elaeagia	Elaeagia_sp4	sapling	NA	NA	NA	NA	NA	NA	NA	13.067	NA
122	12	-71.526	-13.033	1189	15.43	sub montane forest	5991.77	105d	3.5	0.8	NA	Primulaceae	Clavija	Clavija_sp1	shrub	-0.424	5.667	-0.271	97.706	15.174	0.055	0.051	14.365	NA
123	13	-71.526	-13.035	1212	9.7	sub montane forest	5990.31	106	1.2	1.4	NA	Gesneriaceae	Besleria	Besleria_sp3	shrub	NA	NA	NA	NA	NA	NA	NA	NA	51.566
124	13	-71.526	-13.035	1212	9.7	sub montane forest	5990.31	107	1.6	1.5	NA	Melastomataceae	Miconia	Miconia_sp36	shrub	NA	NA	NA	NA	NA	NA	NA	19.024	68.073
125	13	-71.526	-13.035	1212	9.7	sub montane forest	5990.31	108	1.5	1.5	NA	Melastomataceae	Miconia	Miconia_sp6	shrub	NA	NA	NA	NA	NA	NA	NA	13.008	45.168
126	13	-71.526	-13.035	1212	9.7	sub montane forest	5990.31	109	0.7	1.4	NA	NA	NA	morphospecie_13_109	sapling	NA	NA	NA	NA	NA	NA	NA	NA	84.425
127	13	-71.526	-13.035	1212	9.7	sub montane forest	5990.31	110	0.8	1	NA	Gesneriaceae	Besleria	Besleria_sp3	shrub	NA	NA	NA	NA	NA	NA	NA	NA	91.412
128	13	-71.526	-13.035	1212	9.7	sub montane forest	5990.31	111	0.9	1.1	NA	Piperaceae	Piper	Piper_sp1	shrub	-0.893	6.234	-0.413	96.745	94.563	0.008	0.021	17.151	84.373
129	13	-71.526	-13.035	1212	9.7	sub montane forest	5990.31	112	0.8	1	NA	Rubiaceae	Palicourea	Palicourea_lineata	sapling	NA	NA	NA	NA	NA	NA	NA	NA	89.382
130	13	-71.526	-13.035	1212	9.7	sub montane forest	5990.31	113	0.8	1.3	NA	Gesneriaceae	NA	Gesneriaceae_13_113	shrub	NA	NA	NA	NA	NA	NA	NA	NA	78.142
131	13	-71.526	-13.035	1212	9.7	sub montane forest	5990.31	114	0.9	1.5	NA	Gesneriaceae	NA	Gesneriaceae_13_113	shrub	NA	NA	NA	NA	NA	NA	NA	NA	74.593
132	13	-71.526	-13.035	1212	9.7	sub montane forest	5990.31	115	0.9	1	NA	Gesneriaceae	NA	Gesneriaceae_13_113	shrub	NA	NA	NA	NA	NA	NA	NA	NA	85.026
133	13	-71.526	-13.035	1212	9.7	sub montane forest	5990.31	116	1.3	1	NA	Fabaceae	Inga	Inga_sp1	sapling	-0.997	1.858	-0.102	85.191	20.864	0.019	0.014	16.566	57.463
134	13	-71.526	-13.035	1212	9.7	sub montane forest	5990.31	117	1	1.2	NA	Rubiaceae	NA	Rubiaceae_13_117	sapling	NA	NA	NA	NA	NA	NA	NA	NA	83.241
135	13	-71.526	-13.035	1212	9.7	sub montane forest	5990.31	118	1.3	1.3	NA	Rubiaceae	NA	Rubiaceae_13_117	sapling	NA	NA	NA	NA	NA	NA	NA	NA	79.281
136	13	-71.526	-13.035	1212	9.7	sub montane forest	5990.31	119	0.6	1.4	NA	Gesneriaceae	Besleria	Besleria_sp3	shrub	NA	NA	NA	NA	NA	NA	NA	25.508	84.102
137	13	-71.526	-13.035	1212	9.7	sub montane forest	5990.31	120	1.2	1.2	NA	NA	NA	morphospecie_13_120	sapling	NA	NA	NA	NA	NA	NA	NA	NA	70.325
138	13	-71.526	-13.035	1212	9.7	sub montane forest	5990.31	121	1.3	1.1	NA	NA	NA	morphospecie_13_121	sapling	NA	NA	NA	NA	NA	NA	NA	NA	75.059
139	13	-71.526	-13.035	1212	9.7	sub montane forest	5990.31	122	0.6	1.2	NA	Gesneriaceae	Besleria	Besleria_sp3	shrub	NA	NA	NA	NA	NA	NA	NA	NA	74.305
140	13	-71.526	-13.035	1212	9.7	sub montane forest	5990.31	123	1.1	1.5	NA	Gesneriaceae	Besleria	Besleria_sp3	shrub	NA	NA	NA	NA	NA	NA	NA	NA	75.056
141	13	-71.526	-13.035	1212	9.7	sub montane forest	5990.31	124	1.1	1.1	NA	Gesneriaceae	Besleria	Besleria_sp3	shrub	NA	NA	NA	NA	NA	NA	NA	NA	70.684
142	13	-71.526	-13.035	1212	9.7	sub montane forest	5990.31	125	1.8	1.5	1.3	Rubiaceae	NA	Rubiaceae_13_125	sapling	NA	NA	NA	NA	NA	NA	NA	NA	62.266
143	13	-71.526	-13.035	1212	9.7	sub montane forest	5990.31	126	1.2	1.3	NA	NA	NA	morphospecie_13_126	sapling	NA	NA	NA	NA	NA	NA	NA	NA	NA
144	13	-71.526	-13.035	1212	9.7	sub montane forest	5990.31	127	0.7	1.4	NA	Gesneriaceae	Besleria	Besleria_sp3	shrub	NA	NA	NA	NA	NA	NA	NA	NA	79.653
145	13	-71.526	-13.035	1212	9.7	sub montane forest	5990.31	128	1.4	1	0.9	Rubiaceae	NA	Rubiaceae_13_128	sapling	NA	NA	NA	NA	NA	NA	NA	NA	74.259
146	13	-71.526	-13.035	1212	9.7	sub montane forest	5990.31	129	1.2	1.2	NA	Rubiaceae	NA	Rubiaceae_13_129	sapling	NA	NA	NA	NA	NA	NA	NA	NA	80.356
147	13	-71.526	-13.035	1212	9.7	sub montane forest	5990.31	130	0.9	1.1	NA	Gesneriaceae	Besleria	Besleria_sp3	shrub	NA	NA	NA	NA	NA	NA	NA	NA	95.77
148	13	-71.526	-13.035	1212	9.7	sub montane forest	5990.31	131	0.8	1.2	NA	NA	NA	morphospecie_13_131	sapling	NA	NA	NA	NA	NA	NA	NA	NA	73.543
149	13	-71.526	-13.035	1212	9.7	sub montane forest	5990.31	132	0.6	1.1	NA	Melastomataceae	Miconia	Miconia_sp52	shrub	NA	NA	NA	NA	NA	NA	NA	NA	69.823
150	13	-71.526	-13.035	1212	9.7	sub montane forest	5990.31	133	0.8	1	NA	Rubiaceae	NA	Rubiaceae_13_133	sapling	NA	NA	NA	NA	NA	NA	NA	NA	81.747
151	13	-71.526	-13.035	1212	9.7	sub montane forest	5990.31	134	1	1.1	NA	Rubiaceae	NA	Rubiaceae_13_133	sapling	NA	NA	NA	NA	NA	NA	NA	NA	82.493
152	13	-71.526	-13.035	1212	9.7	sub montane forest	5990.31	135	0.9	1.2	NA	Rubiaceae	NA	Rubiaceae_13_133	sapling	NA	NA	NA	NA	NA	NA	NA	NA	88.501
153	13	-71.526	-13.035	1212	9.7	sub montane forest	5990.31	136	1	1.1	NA	Melastomataceae	Miconia	Miconia_sp53	shrub	NA	NA	NA	NA	NA	NA	NA	NA	71.408
154	14	-71.532	-13.045	1296	16.31	sub montane forest	5958.3	137	0.8	1.4	NA	Menispermaceae	Abuta	Abuta_sp1	sapling	-0.419	2.994	-0.209	90.183	5.725	0.117	0.312	8.349	47.313
155	14	-71.532	-13.045	1296	16.31	sub montane forest	5958.3	138	1.8	2.3	1.2	Phyllanthaceae	Phyllanthus	Phyllanthus_attenuatus	sapling	-1.374	3.476	-1.222	41.339	2.317	0.404	3.737	31.29	68.148
156	14	-71.532	-13.045	1296	16.31	sub montane forest	5958.3	139	2.4	2	1.2	Meliaceae	Guarea	Guarea_kunthiana	sapling	-0.98	3.885	-0.622	85.873	27.181	0.034	0.277	10.747	40.617
157	14	-71.532	-13.045	1296	16.31	sub montane forest	5958.3	140	0.7	1.3	NA	NA	NA	morphospecie_14_140	sapling	NA	NA	NA	NA	NA	NA	NA	NA	38.321
158	14	-71.532	-13.045	1296	16.31	sub montane forest	5958.3	141	1.5	1.2	NA	Piperaceae	Piper	Piper_sp2	shrub	-0.637	4.488	-0.438	89.853	24.084	0.038	0.314	27.724	80.108
159	14	-71.532	-13.045	1296	16.31	sub montane forest	5958.3	142	1.3	1.2	NA	Piperaceae	Piper	Piper_sp2	shrub	NA	NA	NA	NA	NA	NA	NA	NA	74.59
160	14	-71.532	-13.045	1296	16.31	sub montane forest	5958.3	143	0.9	1.1	NA	Piperaceae	Piper	Piper_sp10	shrub	NA	NA	NA	NA	NA	NA	NA	NA	78.515
161	14	-71.532	-13.045	1296	16.31	sub montane forest	5958.3	144	1.2	1.2	NA	Piperaceae	Piper	Piper_sp2	shrub	NA	NA	NA	NA	NA	NA	NA	36.706	77.351
162	14	-71.532	-13.045	1296	16.31	sub montane forest	5958.3	145	1.2	1.1	NA	Piperaceae	Piper	Piper_sp2	shrub	NA	NA	NA	NA	NA	NA	NA	NA	76.189
163	14	-71.532	-13.045	1296	16.31	sub montane forest	5958.3	146	1.4	1.3	NA	Piperaceae	Piper	Piper_sp2	shrub	NA	NA	NA	NA	NA	NA	NA	NA	70.054
164	14	-71.532	-13.045	1296	16.31	sub montane forest	5958.3	147	1.8	1.8	0.9	Myrtaceae	Eugenia	Eugenia_biflora	sapling	-1.197	2.671	-0.441	73.985	8.916	0.071	0.11	11.613	45.775
165	14	-71.532	-13.045	1296	16.31	sub montane forest	5958.3	148	0.6	1.2	NA	NA	NA	morphospecie_14_148	sapling	NA	NA	NA	NA	NA	NA	NA	NA	27.78
166	14	-71.532	-13.045	1296	16.31	sub montane forest	5958.3	149	1	1.3	NA	Myrtaceae	Myrcia	Myrcia_magnifolia	sapling	-0.82	1.552	-0.516	90.158	11.065	0.074	0.18	20.61	48.311
167	14	-71.532	-13.045	1296	16.31	sub montane forest	5958.3	150	1.1	1.2	NA	Rubiaceae	NA	Rubiaceae_14_150	sapling	NA	NA	NA	NA	NA	NA	NA	NA	28.887
168	14	-71.532	-13.045	1296	16.31	sub montane forest	5958.3	151	1.4	2.5	NA	Monimiaceae	Mollinedia	Mollinedia_ovata	shrub	-1.839	4.198	-0.633	69.128	41.721	0.024	0.08	20.947	59.456
169	14	-71.532	-13.045	1296	16.31	sub montane forest	5958.3	152	1.1	1	NA	Clusiaceae	Chrysochlamys	Chrysochlamys_ulei	sapling	NA	NA	NA	NA	NA	NA	NA	40.252	71.666
170	14	-71.532	-13.045	1296	16.31	sub montane forest	5958.3	152a	2	1.2	0.9	Lauraceae	Nectandra	Nectandra_sp1	sapling	-1.651	2.278	-1.101	66.441	29.625	0.032	0.479	12.281	NA
171	14	-71.532	-13.045	1296	16.31	sub montane forest	5958.3	152b	3.5	2.7	2.2	NA	NA	morphospecie_14_152b	sapling	NA	NA	NA	NA	NA	NA	NA	16.113	NA
172	14	-71.532	-13.045	1296	16.31	sub montane forest	5958.3	152c	2	2.2	1	Primulaceae	NA	Primulaceae_14_152c	sapling	NA	NA	NA	NA	NA	NA	NA	NA	NA
173	15	-71.544	-13.047	1771	22.8	sub montane forest	5363.43	153	3.5	2.6	2.2	Chloranthaceae	Hedyosmum	Hedyosmum_goudotianum	sapling	-0.339	4.315	-0.196	95.647	8.332	0.079	0.095	6.42	66.642
174	15	-71.544	-13.047	1771	22.8	sub montane forest	5363.43	154	2.1	2.2	1.4	Chloranthaceae	Hedyosmum	Hedyosmum_goudotianum	sapling	-0.375	4.69	-0.225	95.938	7.068	0.092	0.101	7.124	68.734
175	15	-71.544	-13.047	1771	22.8	sub montane forest	5363.43	155	4.2	2.7	2.5	Melastomataceae	Miconia	Miconia_sp19	shrub	-0.742	3.282	-0.338	80.555	20.003	0.056	0.13	14.24	33.07
176	15	-71.544	-13.047	1771	22.8	sub montane forest	5363.43	156	0.5	1.2	NA	Fabaceae	Inga	Inga_sp2	sapling	-1.231	2.309	-0.679	86.094	22.734	0.034	0.123	16.515	73.374
177	15	-71.544	-13.047	1771	22.8	sub montane forest	5363.43	157	2.4	2.6	1.7	Melastomataceae	Miconia	Miconia_sp37	shrub	-0.733	3.759	-0.437	81.25	9.978	0.082	0.338	89.241	52.355
178	15	-71.544	-13.047	1771	22.8	sub montane forest	5363.43	158	1.4	1.2	NA	Fabaceae	Inga	Inga_sp2	sapling	-1.381	2.716	-1.106	81.465	28.199	0.033	0.513	22.66	59.935
179	15	-71.544	-13.047	1771	22.8	sub montane forest	5363.43	159	2.5	1.4	1.1	Chloranthaceae	Hedyosmum	Hedyosmum_sp1	sapling	NA	NA	NA	NA	NA	NA	NA	NA	75.814
180	15	-71.544	-13.047	1771	22.8	sub montane forest	5363.43	160	1.4	1.6	NA	Rubiaceae	NA	Rubiaceae_15_160	sapling	-0.694	4.215	-0.339	89.856	39.52	0.024	0.132	28.761	32.957
181	15	-71.544	-13.047	1771	22.8	sub montane forest	5363.43	161	2	1.7	1	Monimiaceae	Mollinedia	Mollinedia_lanceolata	shrub	-0.632	3.519	-0.41	88.226	24.989	0.056	0.363	14.34	49.809
182	15	-71.544	-13.047	1771	22.8	sub montane forest	5363.43	162	1	1.5	NA	Rubiaceae	Faramea	Faramea_sp1	sapling	-0.761	3.347	-0.391	90.72	24.177	0.035	0.123	23.826	51.566
183	15	-71.544	-13.047	1771	22.8	sub montane forest	5363.43	163	2.8	2.5	1.7	Fabaceae	Swartzia	Swartzia_sp1	sapling	NA	NA	NA	NA	NA	NA	NA	NA	73.798
184	15	-71.544	-13.047	1771	22.8	sub montane forest	5363.43	164	1.3	1.2	NA	Fabaceae	Inga	Inga_sp2	sapling	-1.105	2.333	-0.582	86.274	24.564	0.032	0.127	NA	65.263
185	15	-71.544	-13.047	1771	22.8	sub montane forest	5363.43	165	1.7	1.9	NA	Primulaceae	NA	Primulaceae_15_165	sapling	-0.845	3.015	-0.683	94.439	12.439	0.064	NA	23.352	76.804
186	15	-71.544	-13.047	1771	22.8	sub montane forest	5363.43	166	2.5	2.3	1.6	Chloranthaceae	Hedyosmum	Hedyosmum_goudotianum	sapling	NA	NA	NA	NA	NA	NA	NA	NA	45.206
187	15	-71.544	-13.047	1771	22.8	sub montane forest	5363.43	167	1.9	1.2	1.2	Chloranthaceae	Hedyosmum	Hedyosmum_goudotianum	sapling	NA	NA	NA	NA	NA	NA	NA	NA	49.355
188	15	-71.544	-13.047	1771	22.8	sub montane forest	5363.43	168	1.8	1.3	NA	Chloranthaceae	Hedyosmum	Hedyosmum_sp1	sapling	NA	NA	NA	NA	NA	NA	NA	NA	65.365
189	15	-71.544	-13.047	1771	22.8	sub montane forest	5363.43	169	1.5	1.5	NA	Melastomataceae	Miconia	Miconia_sp40	shrub	-1.256	3.654	-0.82	84.641	36.039	0.025	1.42	45.576	34.896
190	15	-71.544	-13.047	1771	22.8	sub montane forest	5363.43	170	3.3	2.1	1.7	Primulaceae	Clavija	Clavija_sp2	shrub	-0.905	3.288	-0.514	91.016	9.249	0.066	NA	25.117	81.473
191	15	-71.544	-13.047	1771	22.8	sub montane forest	5363.43	171	1.5	1	NA	Fabaceae	NA	Fabaceae_15_171	sapling	NA	NA	NA	NA	NA	NA	NA	NA	41.172
192	15	-71.544	-13.047	1771	22.8	sub montane forest	5363.43	172	2.5	1.8	1.3	Chloranthaceae	Hedyosmum	Hedyosmum_sp1	sapling	NA	NA	NA	NA	NA	NA	NA	NA	34.499
193	15	-71.544	-13.047	1771	22.8	sub montane forest	5363.43	173	4.1	1.7	1.5	Fabaceae	Inga	Inga_sp2	sapling	NA	NA	NA	NA	NA	NA	NA	NA	58.403
194	15	-71.544	-13.047	1771	22.8	sub montane forest	5363.43	174	1.7	1.6	0.9	Melastomataceae	Miconia	Miconia_sp22	shrub	NA	NA	NA	NA	NA	NA	NA	NA	73.594
195	15	-71.544	-13.047	1771	22.8	sub montane forest	5363.43	175	1.3	1.2	NA	Melastomataceae	Miconia	Miconia_sp59	shrub	NA	NA	NA	NA	NA	NA	NA	46.78	40.884
196	15	-71.544	-13.047	1771	22.8	sub montane forest	5363.43	176	1.4	1.1	NA	Monimiaceae	Mollinedia	Mollinedia_lanceolata	shrub	NA	NA	NA	NA	NA	NA	NA	17.161	43.517
197	15	-71.544	-13.047	1771	22.8	sub montane forest	5363.43	176a	3.4	2.6	2	Rubiaceae	Psychotria	Psychotria_sp8	shrub	NA	NA	NA	NA	NA	NA	NA	NA	NA
198	15	-71.544	-13.047	1771	22.8	sub montane forest	5363.43	176b	4	2.8	1.9	NA	NA	morphospecie_15_176b	sapling	-1.29	2.929	-0.635	81.604	40.105	0.039	0.175	22.434	NA
199	15	-71.544	-13.047	1771	22.8	sub montane forest	5363.43	176c	3.5	2.7	1.8	NA	NA	morphospecie_15_176c	sapling	NA	NA	NA	NA	NA	NA	NA	NA	NA
200	16	-71.542	-13.047	1837	29.03	cloud forest	5267.36	177	1.2	1.5	NA	Chloranthaceae	Hedyosmum	Hedyosmum_goudotianum	sapling	NA	NA	NA	NA	NA	NA	NA	NA	65.032
201	16	-71.542	-13.047	1837	29.03	cloud forest	5267.36	178	1.6	1.8	1	Chloranthaceae	Hedyosmum	Hedyosmum_goudotianum	sapling	-0.514	4.029	-0.419	97.061	108.509	0.011	0.336	9.837	61.014
202	16	-71.542	-13.047	1837	29.03	cloud forest	5267.36	179	1.7	1.4	0.9	Melastomataceae	Miconia	Miconia_sp16	shrub	NA	NA	NA	NA	NA	NA	NA	34.929	81.795
203	16	-71.542	-13.047	1837	29.03	cloud forest	5267.36	180	1.1	1	NA	Rubiaceae	Palicourea	Palicourea_lineata	sapling	-0.436	3.513	-0.206	95.562	16.125	0.045	0.059	25.284	48.188
204	16	-71.542	-13.047	1837	29.03	cloud forest	5267.36	181	1.5	1.2	0.8	Rubiaceae	Palicourea	Palicourea_lineata	sapling	-0.518	3.383	-0.239	95.286	19.164	0.039	0.063	NA	61.775
205	16	-71.542	-13.047	1837	29.03	cloud forest	5267.36	182	1.5	1.1	0.7	Rubiaceae	Palicourea	Palicourea_lineata	sapling	-0.612	3.164	-0.335	89.504	14.084	0.056	0.168	18.04	46.856
206	16	-71.542	-13.047	1837	29.03	cloud forest	5267.36	183	1.4	1.4	1	Chloranthaceae	Hedyosmum	Hedyosmum_goudotianum	sapling	NA	NA	NA	NA	NA	NA	NA	NA	67.891
207	16	-71.542	-13.047	1837	29.03	cloud forest	5267.36	184	2.4	1.5	1.1	Rubiaceae	NA	Rubiaceae_16_184	sapling	NA	NA	NA	NA	NA	NA	NA	NA	49.747
208	16	-71.542	-13.047	1837	29.03	cloud forest	5267.36	185	1.8	1.7	1	Chloranthaceae	Hedyosmum	Hedyosmum_sp2	sapling	NA	NA	NA	NA	NA	NA	NA	NA	60.596
209	16	-71.542	-13.047	1837	29.03	cloud forest	5267.36	186	1.5	1.2	0.7	Melastomataceae	Miconia	Miconia_sp9	shrub	-0.453	3.312	-0.309	96.486	23.559	0.036	0.219	18.552	54.415
210	16	-71.542	-13.047	1837	29.03	cloud forest	5267.36	187	0.6	1	NA	Primulaceae	NA	Primulaceae_16_187	sapling	-0.867	3.468	-0.582	86.038	12.383	0.069	0.311	29.642	81.375
211	16	-71.542	-13.047	1837	29.03	cloud forest	5267.36	188	0.6	1.1	NA	Chloranthaceae	Hedyosmum	Hedyosmum_goudotianum	sapling	NA	NA	NA	NA	NA	NA	NA	NA	77.197
212	16	-71.542	-13.047	1837	29.03	cloud forest	5267.36	189	0.8	1.2	NA	Chloranthaceae	Hedyosmum	Hedyosmum_sp2	sapling	NA	NA	NA	NA	NA	NA	NA	NA	81.098
213	16	-71.542	-13.047	1837	29.03	cloud forest	5267.36	190	0.6	1.1	NA	Rubiaceae	Psychotria	Psychotria_conephoroides	shrub	-0.462	4.128	-0.237	90.557	17.3	0.047	0.142	11.679	68.873
214	16	-71.542	-13.047	1837	29.03	cloud forest	5267.36	191	0.8	1.1	NA	Chloranthaceae	Hedyosmum	Hedyosmum_goudotianum	sapling	NA	NA	NA	NA	NA	NA	NA	NA	43.906
215	16	-71.542	-13.047	1837	29.03	cloud forest	5267.36	192	1.7	1.5	1.2	Chloranthaceae	Hedyosmum	Hedyosmum_goudotianum	sapling	NA	NA	NA	NA	NA	NA	NA	NA	55.409
216	16	-71.542	-13.047	1837	29.03	cloud forest	5267.36	193	0.9	1.1	NA	Chloranthaceae	Hedyosmum	Hedyosmum_goudotianum	sapling	NA	NA	NA	NA	NA	NA	NA	NA	51.575
217	16	-71.542	-13.047	1837	29.03	cloud forest	5267.36	194	2.1	1.7	1.2	Melastomataceae	Miconia	Miconia_sp31	shrub	NA	NA	NA	NA	NA	NA	NA	17.303	30.569
218	16	-71.542	-13.047	1837	29.03	cloud forest	5267.36	195	1	1.2	NA	Chloranthaceae	Hedyosmum	Hedyosmum_goudotianum	sapling	NA	NA	NA	NA	NA	NA	NA	NA	51.89
219	16	-71.542	-13.047	1837	29.03	cloud forest	5267.36	196	2.4	2	1.7	Chloranthaceae	Hedyosmum	Hedyosmum_goudotianum	sapling	-0.458	4.105	-0.288	96.487	23.248	0.043	0.098	14.108	53.72
220	16	-71.542	-13.047	1837	29.03	cloud forest	5267.36	197	1.5	1.8	1.1	Chloranthaceae	Hedyosmum	Hedyosmum_goudotianum	sapling	NA	NA	NA	NA	NA	NA	NA	NA	36.763
221	16	-71.542	-13.047	1837	29.03	cloud forest	5267.36	198	0.8	1.2	NA	Chloranthaceae	Hedyosmum	Hedyosmum_goudotianum	sapling	NA	NA	NA	NA	NA	NA	NA	NA	37.006
222	16	-71.542	-13.047	1837	29.03	cloud forest	5267.36	199	1.4	1.6	1.2	Chloranthaceae	Hedyosmum	Hedyosmum_goudotianum	sapling	NA	NA	NA	NA	NA	NA	NA	NA	39.172
223	16	-71.542	-13.047	1837	29.03	cloud forest	5267.36	200	1.4	2	1.2	Chloranthaceae	Hedyosmum	Hedyosmum_goudotianum	sapling	NA	NA	NA	NA	NA	NA	NA	NA	42.346
224	16	-71.542	-13.047	1837	29.03	cloud forest	5267.36	201	1.9	2.2	1.2	Chloranthaceae	Hedyosmum	Hedyosmum_goudotianum	sapling	NA	NA	NA	NA	NA	NA	NA	NA	47.138
225	16	-71.542	-13.047	1837	29.03	cloud forest	5267.36	202	1	1.2	NA	Rubiaceae	NA	Rubiaceae_16_202	sapling	-0.271	3.986	-0.171	97.195	8.786	0.097	0.106	72.335	58.077
226	16	-71.542	-13.047	1837	29.03	cloud forest	5267.36	203	1.2	1.5	NA	Primulaceae	Clavija	Clavija_sp3	shrub	NA	NA	NA	NA	NA	NA	NA	NA	41.556
227	16	-71.542	-13.047	1837	29.03	cloud forest	5267.36	204	0.8	1.6	NA	Urticaceae	Pourouma	Pourouma_mollis	sapling	-1.03	3.017	-0.613	94.871	226.784	0.004	0.048	28.164	70.139
228	16	-71.542	-13.047	1837	29.03	cloud forest	5267.36	205	0.8	1.1	NA	Melastomataceae	Miconia	Miconia_sp16	shrub	NA	NA	NA	NA	NA	NA	NA	39.154	68.35
229	17	-71.536	-13.049	1503	27.2	sub montane forest	5750.58	206	1.1	1	NA	Rubiaceae	NA	Rubiaceae_17_206	sapling	NA	NA	NA	NA	NA	NA	NA	NA	57.524
230	17	-71.536	-13.049	1503	27.2	sub montane forest	5750.58	207	2.1	2	1.2	Rubiaceae	Palicourea	Palicourea_sp5	sapling	-0.941	2.846	-0.49	86.618	7.128	0.082	0.124	10.965	48.219
231	17	-71.536	-13.049	1503	27.2	sub montane forest	5750.58	208	1.9	2.5	1.5	Rubiaceae	NA	Rubiaceae_17_206	sapling	NA	NA	NA	NA	NA	NA	NA	NA	64.241
232	17	-71.536	-13.049	1503	27.2	sub montane forest	5750.58	209	1	1.1	NA	Rubiaceae	NA	Rubiaceae_17_206	sapling	-0.897	3.317	-0.506	85.27	6.876	0.102	0.194	11.536	53.592
233	17	-71.536	-13.049	1503	27.2	sub montane forest	5750.58	210	1.3	1.8	NA	Melastomataceae	Miconia	Miconia_sp27	shrub	NA	NA	NA	NA	NA	NA	NA	9.888	71.971
234	17	-71.536	-13.049	1503	27.2	sub montane forest	5750.58	211	2.9	2.3	2	Sapindaceae	Matayba	Matayba_sp1	sapling	NA	NA	NA	NA	NA	NA	NA	NA	75.937
235	17	-71.536	-13.049	1503	27.2	sub montane forest	5750.58	212	1.3	1.5	NA	Rubiaceae	NA	Rubiaceae_17_206	sapling	NA	NA	NA	NA	NA	NA	NA	NA	63.769
236	17	-71.536	-13.049	1503	27.2	sub montane forest	5750.58	213	1.2	1.1	NA	Rubiaceae	NA	Rubiaceae_17_206	sapling	NA	NA	NA	NA	NA	NA	NA	NA	55.191
237	17	-71.536	-13.049	1503	27.2	sub montane forest	5750.58	214	1.3	1.1	NA	Rubiaceae	NA	Rubiaceae_17_206	sapling	NA	NA	NA	NA	NA	NA	NA	NA	69.018
238	17	-71.536	-13.049	1503	27.2	sub montane forest	5750.58	215	1.3	1.2	NA	Rubiaceae	NA	Rubiaceae_17_206	sapling	NA	NA	NA	NA	NA	NA	NA	NA	62.295
239	17	-71.536	-13.049	1503	27.2	sub montane forest	5750.58	216	1.6	1.7	1.1	Rubiaceae	NA	Rubiaceae_17_206	sapling	NA	NA	NA	NA	NA	NA	NA	NA	57.189
240	17	-71.536	-13.049	1503	27.2	sub montane forest	5750.58	217	1.7	1.3	0.9	Rubiaceae	NA	Rubiaceae_17_206	sapling	NA	NA	NA	NA	NA	NA	NA	NA	57.232
241	17	-71.536	-13.049	1503	27.2	sub montane forest	5750.58	218	2.8	2	1.7	Piperaceae	Piper	Piper_sp3	shrub	NA	NA	NA	NA	NA	NA	NA	11.034	83.591
242	17	-71.536	-13.049	1503	27.2	sub montane forest	5750.58	219	1.9	1.5	1	Rubiaceae	NA	Rubiaceae_17_206	sapling	NA	NA	NA	NA	NA	NA	NA	NA	65.691
243	17	-71.536	-13.049	1503	27.2	sub montane forest	5750.58	220	1.7	1.6	0.9	Lauraceae	Endlicheria	Endlicheria_sp1	sapling	-1.613	1.712	-0.806	74.209	114.926	0.01	0.135	2.859	30.799
244	17	-71.536	-13.049	1503	27.2	sub montane forest	5750.58	221	1.6	1.3	1.1	Lauraceae	Endlicheria	Endlicheria_sp1	sapling	NA	NA	NA	NA	NA	NA	NA	NA	35.604
245	17	-71.536	-13.049	1503	27.2	sub montane forest	5750.58	222	2.4	1.6	1.2	Piperaceae	Piper	Piper_sp4	shrub	NA	NA	NA	NA	NA	NA	NA	25.976	81.48
246	17	-71.536	-13.049	1503	27.2	sub montane forest	5750.58	223	2.5	2.4	2	Rubiaceae	Ladenbergia	Ladenbergia_sp1	sapling	NA	NA	NA	NA	NA	NA	NA	NA	85.023
247	17	-71.536	-13.049	1503	27.2	sub montane forest	5750.58	224	1	1.3	NA	Melastomataceae	Miconia	Miconia_sp27	shrub	-0.532	3.486	-0.164	84.829	45.2	0.019	0.035	12.295	66.207
248	17	-71.536	-13.049	1503	27.2	sub montane forest	5750.58	225	1.2	1.3	NA	Rubiaceae	NA	Rubiaceae_17_206	sapling	NA	NA	NA	NA	NA	NA	NA	NA	66.269
249	17	-71.536	-13.049	1503	27.2	sub montane forest	5750.58	226	1.9	1.8	1.2	Piperaceae	Piper	Piper_sp3	shrub	NA	NA	NA	NA	NA	NA	NA	NA	72.967
250	17	-71.536	-13.049	1503	27.2	sub montane forest	5750.58	227	3.2	2.4	1.7	Lauraceae	Ocotea	Ocotea_cernua	sapling	NA	NA	NA	NA	NA	NA	NA	NA	35.645
251	17	-71.536	-13.049	1503	27.2	sub montane forest	5750.58	228	2.7	2.2	1.6	Piperaceae	NA	Piperaceae_17_228	shrub	NA	NA	NA	NA	NA	NA	NA	NA	67.332
252	17	-71.536	-13.049	1503	27.2	sub montane forest	5750.58	229	0.6	1.2	NA	Melastomataceae	Miconia	Miconia_sp27	shrub	NA	NA	NA	NA	NA	NA	NA	10.541	44.803
253	17	-71.536	-13.049	1503	27.2	sub montane forest	5750.58	230	2.1	2.5	1.5	Rubiaceae	Faramea	Faramea_sp1	sapling	-1.279	4.29	-1.198	71.351	14.136	0.07	3.185	7.933	43.926
254	17	-71.536	-13.049	1503	27.2	sub montane forest	5750.58	231	1.3	1.3	NA	Chrysobalanaceae	Parinari	Parinari_occidentalis	sapling	NA	NA	NA	NA	NA	NA	NA	14.495	51.876
255	17	-71.536	-13.049	1503	27.2	sub montane forest	5750.58	232	0.9	1.2	NA	Rubiaceae	NA	morphospecie_17_232	sapling	-0.846	6.614	-0.415	71.836	4.01	0.158	0.4	15.322	71.545
256	17	-71.536	-13.049	1503	27.2	sub montane forest	5750.58	233	1	1.1	NA	Rubiaceae	NA	morphospecie_17_232	sapling	-0.795	6.357	-0.339	78.295	6.051	0.102	0.178	14.316	67.375
257	17	-71.536	-13.049	1503	27.2	sub montane forest	5750.58	234	1	1.5	NA	Rubiaceae	Palicourea	Palicourea_sp3	sapling	-0.748	4.713	-0.472	96.126	12.109	0.051	0.086	19.209	68.043
258	17	-71.536	-13.049	1503	27.2	sub montane forest	5750.58	235	1.2	1.6	1.6	NA	NA	morphospecie_17_235	sapling	NA	NA	NA	NA	NA	NA	NA	NA	55.96
259	17	-71.536	-13.049	1503	27.2	sub montane forest	5750.58	236	1	1.2	1.2	Melastomataceae	Miconia	Miconia_sp27	shrub	-0.77	3.715	-0.238	87.227	15.682	0.04	0.052	10.15	66.837
260	17	-71.536	-13.049	1503	27.2	sub montane forest	5750.58	237	1.4	1.2	1.2	Rubiaceae	NA	Rubiaceae_17_206	sapling	NA	NA	NA	NA	NA	NA	NA	NA	57.663
261	17	-71.536	-13.049	1503	27.2	sub montane forest	5750.58	238	1.8	1.9	1.9	Rubiaceae	NA	Rubiaceae_17_206	sapling	NA	NA	NA	NA	NA	NA	NA	NA	59.677
262	17	-71.536	-13.049	1503	27.2	sub montane forest	5750.58	239	2	1.5	1.5	Rubiaceae	NA	Rubiaceae_17_206	sapling	NA	NA	NA	NA	NA	NA	NA	NA	67.021
263	17	-71.536	-13.049	1503	27.2	sub montane forest	5750.58	240	1.6	1.2	1.2	Rubiaceae	NA	Rubiaceae_17_206	sapling	NA	NA	NA	NA	NA	NA	NA	NA	65.945
264	17	-71.536	-13.049	1503	27.2	sub montane forest	5750.58	241	1.6	1.2	1.2	Rubiaceae	NA	Rubiaceae_17_206	sapling	NA	NA	NA	NA	NA	NA	NA	NA	68.399
265	17	-71.536	-13.049	1503	27.2	sub montane forest	5750.58	242	2.9	2.6	2.6	Rubiaceae	Faramea	Faramea_sp1	sapling	NA	NA	NA	NA	NA	NA	NA	13.746	40.104
266	17	-71.536	-13.049	1503	27.2	sub montane forest	5750.58	243	0.6	1	1	NA	NA	morphospecie_17_243	sapling	NA	NA	NA	NA	NA	NA	NA	NA	71.429
267	17	-71.536	-13.049	1503	27.2	sub montane forest	5750.58	244	0.9	1.2	1.2	Rubiaceae	NA	Rubiaceae_17_206	sapling	NA	NA	NA	NA	NA	NA	NA	NA	58.738
268	17	-71.536	-13.049	1503	27.2	sub montane forest	5750.58	245	1.3	1.2	1.2	Rubiaceae	NA	Rubiaceae_17_206	sapling	NA	NA	NA	NA	NA	NA	NA	NA	70.749
269	18	-71.537	-13.048	1545	21.54	sub montane forest	5694.25	246	2	2.1	1	Melastomataceae	Miconia	Miconia_sp9	shrub	NA	NA	NA	NA	NA	NA	NA	12.153	52.689
270	18	-71.537	-13.048	1545	21.54	sub montane forest	5694.25	247	2.1	1.7	1	Monimiaceae	Mollinedia	Mollinedia_lanceolata	shrub	NA	NA	NA	NA	NA	NA	NA	9.659	51.864
271	18	-71.537	-13.048	1545	21.54	sub montane forest	5694.25	248	1.1	1	NA	Melastomataceae	Miconia	Miconia_sp9	shrub	NA	NA	NA	NA	NA	NA	NA	11.757	46.187
272	18	-71.537	-13.048	1545	21.54	sub montane forest	5694.25	249	1.4	1.5	0.7	Melastomataceae	Miconia	Miconia_sp59	shrub	NA	NA	NA	NA	NA	NA	NA	NA	52.511
273	18	-71.537	-13.048	1545	21.54	sub montane forest	5694.25	250	1.1	1.2	NA	Melastomataceae	Miconia	Miconia_sp59	shrub	NA	NA	NA	NA	NA	NA	NA	NA	53.623
274	18	-71.537	-13.048	1545	21.54	sub montane forest	5694.25	251	2.2	2.1	1.5	Melastomataceae	Miconia	Miconia_sp59	shrub	NA	NA	NA	NA	NA	NA	NA	NA	41.565
275	18	-71.537	-13.048	1545	21.54	sub montane forest	5694.25	252	1.4	1.3	0.7	Melastomataceae	Miconia	Miconia_sp32	shrub	NA	NA	NA	NA	NA	NA	NA	18.746	52.98
276	18	-71.537	-13.048	1545	21.54	sub montane forest	5694.25	253	2.7	2.3	1.2	Melastomataceae	Miconia	Miconia_sp9	shrub	-0.389	2.615	-0.197	92.371	8.585	0.091	0.168	5.167	21.703
277	18	-71.537	-13.048	1545	21.54	sub montane forest	5694.25	254	1.3	1.1	NA	Melastomataceae	Miconia	Miconia_sp10	shrub	NA	NA	NA	NA	NA	NA	NA	7.953	51.269
278	18	-71.537	-13.048	1545	21.54	sub montane forest	5694.25	255	1.6	1.3	0.7	Melastomataceae	Miconia	Miconia_sp36	shrub	-0.745	3.416	-0.351	86.944	14.04	0.052	0.13	16.325	67.875
279	18	-71.537	-13.048	1545	21.54	sub montane forest	5694.25	256	1.5	1.3	0.9	Rubiaceae	NA	Rubiaceae_18_256	sapling	NA	NA	NA	NA	NA	NA	NA	NA	48.798
280	18	-71.537	-13.048	1545	21.54	sub montane forest	5694.25	257	1.4	1.6	NA	Rubiaceae	Palicourea	Palicourea_lineata	sapling	NA	NA	NA	NA	NA	NA	NA	NA	53.772
281	18	-71.537	-13.048	1545	21.54	sub montane forest	5694.25	258	1.2	1.1	NA	Rubiaceae	Palicourea	Palicourea_sp5	sapling	NA	NA	NA	NA	NA	NA	NA	NA	66.968
282	18	-71.537	-13.048	1545	21.54	sub montane forest	5694.25	259	0.7	1.1	NA	Piperaceae	Piper	Piper_sp11	shrub	NA	NA	NA	NA	NA	NA	NA	NA	55.992
283	18	-71.537	-13.048	1545	21.54	sub montane forest	5694.25	260	0.8	1.1	NA	Melastomataceae	Miconia	Miconia_sp36	shrub	NA	NA	NA	NA	NA	NA	NA	12.305	52.607
284	18	-71.537	-13.048	1545	21.54	sub montane forest	5694.25	261	4	2.6	1.8	Melastomataceae	Miconia	Miconia_sp59	shrub	NA	NA	NA	NA	NA	NA	NA	NA	55.456
285	18	-71.537	-13.048	1545	21.54	sub montane forest	5694.25	262	1.7	2.1	1.4	Melastomataceae	Miconia	Miconia_sp59	shrub	NA	NA	NA	NA	NA	NA	NA	NA	62.952
286	18	-71.537	-13.048	1545	21.54	sub montane forest	5694.25	263	1.4	1.6	0.9	Piperaceae	Piper	Piper_sp4	shrub	NA	NA	NA	NA	NA	NA	NA	14.006	82.954
287	18	-71.537	-13.048	1545	21.54	sub montane forest	5694.25	264	1.9	1.8	1.2	Melastomataceae	Miconia	Miconia_sp59	shrub	NA	NA	NA	NA	NA	NA	NA	NA	56.5
288	18	-71.537	-13.048	1545	21.54	sub montane forest	5694.25	265	1.4	1.1	NA	Melastomataceae	Miconia	Miconia_sp59	shrub	NA	NA	NA	NA	NA	NA	NA	NA	63.299
289	18	-71.537	-13.048	1545	21.54	sub montane forest	5694.25	266	2.1	1.7	1.4	NA	NA	morphospecie_18_266	sapling	NA	NA	NA	NA	NA	NA	NA	NA	62.815
290	18	-71.537	-13.048	1545	21.54	sub montane forest	5694.25	267	0.8	1.1	NA	Fabaceae	Inga	Inga_sp2	sapling	NA	NA	NA	NA	NA	NA	NA	12.773	67.391
291	18	-71.537	-13.048	1545	21.54	sub montane forest	5694.25	268	1.9	1.8	1.1	Monimiaceae	Mollinedia	Mollinedia_ovata	shrub	-1.03	3.077	-0.465	77.804	74.412	0.013	0.152	14.134	57.499
292	18	-71.537	-13.048	1545	21.54	sub montane forest	5694.25	269	0.7	1.3	NA	NA	NA	morphospecie_18_269	sapling	NA	NA	NA	NA	NA	NA	NA	NA	49.57
293	18	-71.537	-13.048	1545	21.54	sub montane forest	5694.25	270	1.1	1.4	NA	Rubiaceae	Palicourea	Palicourea_sp4	sapling	NA	NA	NA	NA	NA	NA	NA	10.403	58.877
294	18	-71.537	-13.048	1545	21.54	sub montane forest	5694.25	271	0.9	1.4	NA	Melastomataceae	Miconia	Miconia_sp31	shrub	NA	NA	NA	NA	NA	NA	NA	9.508	45.468
295	18	-71.537	-13.048	1545	21.54	sub montane forest	5694.25	271a	2.5	2.6	2.1	Rubiaceae	Elaeagia	Elaeagia_sp1	sapling	NA	NA	NA	NA	NA	NA	NA	16.909	NA
296	18	-71.537	-13.048	1545	21.54	sub montane forest	5694.25	271b	3.5	4	2.8	Euphorbiaceae	Alchornea	Alchornea_sp2	sapling	NA	NA	NA	NA	NA	NA	NA	NA	NA
297	18	-71.537	-13.048	1545	21.54	sub montane forest	5694.25	271c	4.5	3.4	3.2	Meliaceae	Guarea	Guarea_kunthiana	sapling	-0.496	1.866	-0.316	97.648	107.172	0.008	0.05	NA	NA
298	18	-71.537	-13.048	1545	21.54	sub montane forest	5694.25	271d	4	2.5	2	Rubiaceae	Palicourea	Palicourea_sp4	sapling	NA	NA	NA	NA	NA	NA	NA	4.742	NA
299	18	-71.537	-13.048	1545	21.54	sub montane forest	5694.25	271e	2.5	2.3	1.4	Rubiaceae	Elaeagia	Elaeagia_sp1	sapling	-0.84	4.838	-0.539	85.133	11.664	0.07	0.311	19.851	NA
300	19	-71.609	-13.119	3601	40.23	high elevation shrubs	1072.62	272	0.8	0.6	NA	NA	NA	morphospecie_19_272	shrub	NA	NA	NA	NA	NA	NA	NA	NA	20.845
301	19	-71.609	-13.119	3601	40.23	high elevation shrubs	1072.62	273	1.6	0.7	NA	NA	NA	morphospecie_19_273	shrub	NA	NA	NA	NA	NA	NA	NA	NA	14.387
302	19	-71.609	-13.119	3601	40.23	high elevation shrubs	1072.62	274	1	0.5	NA	NA	NA	morphospecie_19_274	shrub	NA	NA	NA	NA	NA	NA	NA	NA	9.421
303	19	-71.609	-13.119	3601	40.23	high elevation shrubs	1072.62	275	2.3	0.9	NA	NA	NA	morphospecie_19_273	shrub	NA	NA	NA	NA	NA	NA	NA	NA	14.823
304	19	-71.609	-13.119	3601	40.23	high elevation shrubs	1072.62	276	1.5	0.7	NA	NA	NA	morphospecie_19_273	shrub	NA	NA	NA	NA	NA	NA	NA	NA	12.092
305	19	-71.609	-13.119	3601	40.23	high elevation shrubs	1072.62	277	1.7	0.7	NA	NA	NA	morphospecie_19_273	shrub	NA	NA	NA	NA	NA	NA	NA	NA	10.495
306	19	-71.609	-13.119	3601	40.23	high elevation shrubs	1072.62	278	1.3	0.6	NA	NA	NA	morphospecie_19_274	shrub	NA	NA	NA	NA	NA	NA	NA	NA	12.458
307	19	-71.609	-13.119	3601	40.23	high elevation shrubs	1072.62	279	2	0.8	NA	NA	NA	morphospecie_19_273	shrub	NA	NA	NA	NA	NA	NA	NA	NA	14.413
308	20	-71.608	-13.116	3539	20.09	high elevation shrubs	1624.86	280	1	0.5	NA	NA	NA	morphospecie_19_272	shrub	NA	NA	NA	NA	NA	NA	NA	NA	44.473
309	20	-71.608	-13.116	3539	20.09	high elevation shrubs	1624.86	281	1.2	0.7	NA	NA	NA	morphospecie_19_272	shrub	NA	NA	NA	NA	NA	NA	NA	NA	32.915
310	20	-71.608	-13.116	3539	20.09	high elevation shrubs	1624.86	282	1.8	0.9	NA	NA	NA	morphospecie_19_273	shrub	NA	NA	NA	NA	NA	NA	NA	NA	19.434
311	20	-71.608	-13.116	3539	20.09	high elevation shrubs	1624.86	283	1.2	0.9	NA	NA	NA	morphospecie_19_273	shrub	NA	NA	NA	NA	NA	NA	NA	NA	12.928
312	20	-71.608	-13.116	3539	20.09	high elevation shrubs	1624.86	284	2.8	0.9	NA	NA	NA	morphospecie_20_284	shrub	NA	NA	NA	NA	NA	NA	NA	NA	28.25
313	20	-71.608	-13.116	3539	20.09	high elevation shrubs	1624.86	285	2.9	0.9	NA	NA	NA	morphospecie_20_284	shrub	NA	NA	NA	NA	NA	NA	NA	NA	31.204
314	20	-71.608	-13.116	3539	20.09	high elevation shrubs	1624.86	286	1	0.5	NA	NA	NA	morphospecie_20_286	shrub	NA	NA	NA	NA	NA	NA	NA	NA	12.968
315	21	-71.611	-13.118	3536	18.05	high elevation shrubs	1649.73	287	0.8	0.7	NA	NA	NA	morphospecie_19_273	shrub	NA	NA	NA	NA	NA	NA	NA	NA	24.288
316	21	-71.611	-13.118	3536	18.05	high elevation shrubs	1649.73	288	1	0.9	NA	NA	NA	morphospecie_20_286	shrub	NA	NA	NA	NA	NA	NA	NA	NA	13.863
317	21	-71.611	-13.118	3536	18.05	high elevation shrubs	1649.73	289	1.9	0.9	NA	NA	NA	morphospecie_19_273	shrub	NA	NA	NA	NA	NA	NA	NA	NA	18.449
318	21	-71.611	-13.118	3536	18.05	high elevation shrubs	1649.73	290	1.5	0.6	NA	NA	NA	morphospecie_20_286	shrub	NA	NA	NA	NA	NA	NA	NA	NA	10.678
319	21	-71.611	-13.118	3536	18.05	high elevation shrubs	1649.73	291	1.2	0.9	NA	NA	NA	morphospecie_20_286	shrub	NA	NA	NA	NA	NA	NA	NA	NA	11.338
320	21	-71.611	-13.118	3536	18.05	high elevation shrubs	1649.73	292	1.3	0.9	NA	NA	NA	morphospecie_19_273	shrub	NA	NA	NA	NA	NA	NA	NA	NA	17.154
321	21	-71.611	-13.118	3536	18.05	high elevation shrubs	1649.73	293	1.1	0.9	NA	NA	NA	morphospecie_21_293	shrub	NA	NA	NA	NA	NA	NA	NA	NA	18.424
322	21	-71.611	-13.118	3536	18.05	high elevation shrubs	1649.73	294	2	0.9	NA	NA	NA	morphospecie_21_294	shrub	NA	NA	NA	NA	NA	NA	NA	NA	21.92
323	21	-71.611	-13.118	3536	18.05	high elevation shrubs	1649.73	295	1.1	0.9	NA	NA	NA	morphospecie_20_286	shrub	NA	NA	NA	NA	NA	NA	NA	NA	11.407
324	21	-71.611	-13.118	3536	18.05	high elevation shrubs	1649.73	296	0.9	0.9	NA	NA	NA	morphospecie_20_286	shrub	NA	NA	NA	NA	NA	NA	NA	NA	26.942
325	21	-71.611	-13.118	3536	18.05	high elevation shrubs	1649.73	297	0.7	0.8	NA	NA	NA	morphospecie_20_286	shrub	NA	NA	NA	NA	NA	NA	NA	NA	39.994
326	22	-71.59	-13.101	2754	36.74	cloud forest	4428.43	1	3.2	2.4	1.6	Melastomataceae	Miconia	Miconia_sp20	shrub	NA	NA	NA	NA	NA	NA	NA	35.262	30.41
327	22	-71.59	-13.101	2754	36.74	cloud forest	4428.43	2	1.5	1.1	0.7	Theaceae	Gordonia	Gordonia_fruticosa	sapling	NA	NA	NA	NA	NA	NA	NA	29.511	42.631
328	22	-71.59	-13.101	2754	36.74	cloud forest	4428.43	3	4.5	1.7	1.4	Melastomataceae	Miconia	Miconia_sp4	shrub	NA	NA	NA	NA	NA	NA	NA	41.849	53.136
329	22	-71.59	-13.101	2754	36.74	cloud forest	4428.43	4	1.3	1	0.9	Chloranthaceae	Hedyosmum	Hedyosmum_sp3	sapling	NA	NA	NA	NA	NA	NA	NA	114.432	44.209
330	22	-71.59	-13.101	2754	36.74	cloud forest	4428.43	5	2.3	1.2	0.8	Melastomataceae	Miconia	Miconia_sp35	shrub	NA	NA	NA	NA	NA	NA	NA	24.23	41.708
331	22	-71.59	-13.101	2754	36.74	cloud forest	4428.43	6	2.3	2.2	1.5	Chloranthaceae	Hedyosmum	Hedyosmum_translucidum	sapling	NA	NA	NA	NA	NA	NA	NA	19.102	40.858
332	22	-71.59	-13.101	2754	36.74	cloud forest	4428.43	7	2.5	3.2	1.6	Chloranthaceae	Hedyosmum	Hedyosmum_translucidum	sapling	-1.215	4.104	-0.984	75.31	7.771	0.113	0.906	NA	39.595
333	22	-71.59	-13.101	2754	36.74	cloud forest	4428.43	8	3	1.5	1.1	Melastomataceae	Miconia	Miconia_sp4	shrub	-1.311	1.74	-0.913	19.743	1.432	0.485	1.401	42.592	47.924
334	22	-71.59	-13.101	2754	36.74	cloud forest	4428.43	9	1.8	1.5	NA	Rubiaceae	NA	Rubiaceae_22_9	sapling	-1.202	3.006	-0.737	91.016	10.124	0.061	0.115	33.91	61.185
335	22	-71.59	-13.101	2754	36.74	cloud forest	4428.43	10	2.4	1.1	0.8	Melastomataceae	Miconia	Miconia_sp4	shrub	-1.329	2.493	-0.722	61.863	2.811	0.188	0.336	NA	58.197
336	22	-71.59	-13.101	2754	36.74	cloud forest	4428.43	11	2	1.6	1.1	Chloranthaceae	Hedyosmum	Hedyosmum_translucidum	sapling	NA	NA	NA	NA	NA	NA	NA	NA	43.035
337	22	-71.59	-13.101	2754	36.74	cloud forest	4428.43	12	2.3	1.4	0.9	Theaceae	Gordonia	Gordonia_fruticosa	sapling	NA	NA	NA	NA	NA	NA	NA	16.01	58.962
338	23	-71.59	-13.101	2762	36.74	cloud forest	4421.07	13	1.1	1	NA	Rubiaceae	Psychotria	Psychotria_sp1	shrub	NA	NA	NA	NA	NA	NA	NA	NA	68.851
339	23	-71.59	-13.101	2762	36.74	cloud forest	4421.07	14	3.5	3.4	2.1	Chloranthaceae	Hedyosmum	Hedyosmum_translucidum	sapling	NA	NA	NA	NA	NA	NA	NA	NA	57.456
340	23	-71.59	-13.101	2762	36.74	cloud forest	4421.07	15	2.3	1.6	1.1	Rubiaceae	Psychotria	Psychotria_sp1	shrub	NA	NA	NA	NA	NA	NA	NA	NA	63.03
341	23	-71.59	-13.101	2762	36.74	cloud forest	4421.07	16	2.5	3.3	1.4	Chloranthaceae	Hedyosmum	Hedyosmum_translucidum	sapling	NA	NA	NA	NA	NA	NA	NA	NA	55.813
342	23	-71.59	-13.101	2762	36.74	cloud forest	4421.07	17	1.9	1.1	0.5	Primulaceae	NA	Primulaceae_23_17	sapling	NA	NA	NA	NA	NA	NA	NA	NA	54.696
343	23	-71.59	-13.101	2762	36.74	cloud forest	4421.07	18	2.2	1.4	1	Cunoniaceae	Weinmannia	Weinmannia_reticulata	sapling	NA	NA	NA	NA	NA	NA	NA	NA	48.099
344	23	-71.59	-13.101	2762	36.74	cloud forest	4421.07	19	3.7	3.2	1.7	Melastomataceae	Miconia	Miconia_sp54	shrub	NA	NA	NA	NA	NA	NA	NA	NA	78.627
345	23	-71.59	-13.101	2762	36.74	cloud forest	4421.07	20	3	4.6	2.2	Chloranthaceae	Hedyosmum	Hedyosmum_translucidum	sapling	NA	NA	NA	NA	NA	NA	NA	NA	39.823
346	23	-71.59	-13.101	2762	36.74	cloud forest	4421.07	21	2.1	1.5	0.8	Rubiaceae	Psychotria	Psychotria_sp1	shrub	NA	NA	NA	NA	NA	NA	NA	NA	56.426
347	23	-71.59	-13.101	2762	36.74	cloud forest	4421.07	22	2.2	1.5	1.3	Melastomataceae	Miconia	Miconia_sp54	shrub	NA	NA	NA	NA	NA	NA	NA	NA	43.46
348	23	-71.59	-13.101	2762	36.74	cloud forest	4421.07	23	1.5	2.5	0.6	Cunoniaceae	Weinmannia	Weinmannia_reticulata	sapling	NA	NA	NA	NA	NA	NA	NA	NA	NA
349	23	-71.59	-13.101	2762	36.74	cloud forest	4421.07	24	1.5	1.4	0.3	Cunoniaceae	Weinmannia	Weinmannia_reticulata	sapling	NA	NA	NA	NA	NA	NA	NA	NA	36.609
350	23	-71.59	-13.101	2762	36.74	cloud forest	4421.07	25	3.5	2.7	1.7	Lauraceae	Nectandra	Nectandra_reticulata	sapling	NA	NA	NA	NA	NA	NA	NA	NA	39.623
351	23	-71.59	-13.101	2762	36.74	cloud forest	4421.07	26	3.2	2.3	1.1	Clethraceae	Clethra	Clethra_sp1	sapling	NA	NA	NA	NA	NA	NA	NA	NA	39.54
352	24	-71.589	-13.1	2721	36.66	cloud forest	4457.17	27	2.1	1.6	0.6	Rubiaceae	Psychotria	Psychotria_sp1	shrub	-1.126	5.247	-0.206	78.616	9.706	0.043	0.037	NA	48.938
353	24	-71.589	-13.1	2721	36.66	cloud forest	4457.17	28	3.2	3.5	3.1	Araliaceae	Schefflera	Schefflera_allocotantha	sapling	-0.682	3.076	-0.283	92.926	43.51	0.021	0.058	NA	26.567
354	24	-71.589	-13.1	2721	36.66	cloud forest	4457.17	29	1.5	1.2	0.4	Melastomataceae	Miconia	Miconia_crassistigma	shrub	NA	NA	NA	NA	NA	NA	NA	NA	74.902
355	24	-71.589	-13.1	2721	36.66	cloud forest	4457.17	30	1.4	1.5	0.5	Rubiaceae	NA	Rubiaceae_24_30	sapling	NA	NA	NA	NA	NA	NA	NA	NA	43.378
356	24	-71.589	-13.1	2721	36.66	cloud forest	4457.17	31	1.8	1.9	0.8	Rubiaceae	Psychotria	Psychotria_sp1	shrub	NA	NA	NA	NA	NA	NA	NA	NA	59.871
357	24	-71.589	-13.1	2721	36.66	cloud forest	4457.17	32	2	1.7	0.7	Rubiaceae	Psychotria	Psychotria_sp1	shrub	NA	NA	NA	NA	NA	NA	NA	NA	52.751
358	24	-71.589	-13.1	2721	36.66	cloud forest	4457.17	33	2.3	3.5	2.5	Clethraceae	Clethra	Clethra_sp1	sapling	-1.267	2.885	-0.931	68.572	4.344	0.169	2.894	NA	61.65
359	24	-71.589	-13.1	2721	36.66	cloud forest	4457.17	34	2.7	1.5	1.2	Clethraceae	Clethra	Clethra_sp1	sapling	NA	NA	NA	NA	NA	NA	NA	NA	64.813
360	24	-71.589	-13.1	2721	36.66	cloud forest	4457.17	35	2.6	2.3	1.2	Rosaceae	Prunus	Prunus_integrifolia	sapling	-1.541	2.097	-0.819	83.616	15.273	0.044	0.119	NA	22.692
361	24	-71.589	-13.1	2721	36.66	cloud forest	4457.17	36	1.5	2	0.4	Rubiaceae	Psychotria	Psychotria_sp1	shrub	-1.167	4.388	-0.668	73.484	12.571	0.067	0.269	NA	53.672
362	25	-71.589	-13.1	2724	36.66	cloud forest	4454.66	37	2.2	2.3	1.9	Clusiaceae	Clusia	Clusia_sp3	sapling	NA	NA	NA	NA	NA	NA	NA	20.314	27.338
363	25	-71.589	-13.1	2724	36.66	cloud forest	4454.66	38	2.8	2	1.5	Rubiaceae	Psychotria	Psychotria_sp1	shrub	NA	NA	NA	NA	NA	NA	NA	71.309	56.207
364	25	-71.589	-13.1	2724	36.66	cloud forest	4454.66	39	2.6	1.7	1.4	Rubiaceae	NA	Rubiaceae_25_39	sapling	NA	NA	NA	NA	NA	NA	NA	NA	58.557
365	25	-71.589	-13.1	2724	36.66	cloud forest	4454.66	40	1.9	1.2	0.7	Melastomataceae	Miconia	Miconia_crassistigma	shrub	NA	NA	NA	NA	NA	NA	NA	42.09	68.013
366	25	-71.589	-13.1	2724	36.66	cloud forest	4454.66	41	2.6	3.5	2.5	Chloranthaceae	Hedyosmum	Hedyosmum_sp4	sapling	NA	NA	NA	NA	NA	NA	NA	76.071	80.895
367	25	-71.589	-13.1	2724	36.66	cloud forest	4454.66	42	2.1	1.4	0.6	Primulaceae	NA	Primulaceae_25_42	sapling	NA	NA	NA	NA	NA	NA	NA	23.244	71.871
368	25	-71.589	-13.1	2724	36.66	cloud forest	4454.66	43	2.8	1.7	1.1	Melastomataceae	Miconia	Miconia_crassistigma	shrub	NA	NA	NA	NA	NA	NA	NA	NA	60.252
369	25	-71.589	-13.1	2724	36.66	cloud forest	4454.66	44	2.3	1.3	0.9	Rubiaceae	Psychotria	Psychotria_sp7	shrub	NA	NA	NA	NA	NA	NA	NA	55.053	49.172
370	26	-71.575	-13.089	2525	49.51	cloud forest	4594.87	45	2	1.7	0.8	Melastomataceae	Miconia	Miconia_sp11	shrub	NA	NA	NA	NA	NA	NA	NA	122.149	72.566
371	26	-71.575	-13.089	2525	49.51	cloud forest	4594.87	46	1.9	1	0.8	Melastomataceae	Miconia	Miconia_sp9	shrub	-1.115	6.381	-0.058	65.76	29.106	0.019	0.008	122.116	69.284
372	26	-71.575	-13.089	2525	49.51	cloud forest	4594.87	47	3.4	2.8	2	Lauraceae	Ocotea	Ocotea_sp1	sapling	-0.941	5.101	-0.707	94.477	72.458	0.013	0.153	69.824	46.971
373	26	-71.575	-13.089	2525	49.51	cloud forest	4594.87	48	2.2	1.9	0.9	Lauraceae	Ocotea	Ocotea_sp1	sapling	NA	NA	NA	NA	NA	NA	NA	79.979	27.069
374	26	-71.575	-13.089	2525	49.51	cloud forest	4594.87	49	3.5	3.8	2.4	Melastomataceae	Miconia	Miconia_sp37	shrub	NA	NA	NA	NA	NA	NA	NA	72.178	70.812
375	26	-71.575	-13.089	2525	49.51	cloud forest	4594.87	50	4.2	3.6	2.7	Monimiaceae	Mollinedia	Mollinedia_ovata	shrub	-0.789	5.209	-0.516	94.775	53.486	0.036	0.107	107.571	38.767
376	26	-71.575	-13.089	2525	49.51	cloud forest	4594.87	51	2.1	2.5	1.3	Melastomataceae	Miconia	Miconia_sp37	shrub	NA	NA	NA	NA	NA	NA	NA	NA	69.404
377	26	-71.575	-13.089	2525	49.51	cloud forest	4594.87	52	3.3	2.3	2	Melastomataceae	Graffenrieda	Graffenrieda_sp1	shrub	NA	NA	NA	NA	NA	NA	NA	195.278	76.22
378	26	-71.575	-13.089	2525	49.51	cloud forest	4594.87	53	1.7	1.6	0.9	Solanaceae	NA	Solanaceae_26_53	sapling	NA	NA	NA	NA	NA	NA	NA	NA	NA
379	27	-71.575	-13.089	2526	49.51	cloud forest	4594.24	54	2.8	1.5	1.1	Melastomataceae	Miconia	Miconia_sp55	shrub	NA	NA	NA	NA	NA	NA	NA	NA	40.16
380	27	-71.575	-13.089	2526	49.51	cloud forest	4594.24	55	1.4	1.3	0.8	NA	NA	morphospecie_27_55	sapling	NA	NA	NA	NA	NA	NA	NA	NA	29.368
381	27	-71.575	-13.089	2526	49.51	cloud forest	4594.24	56	3.6	2.8	1.9	NA	NA	morphospecie_27_56	sapling	NA	NA	NA	NA	NA	NA	NA	NA	70.898
382	27	-71.575	-13.089	2526	49.51	cloud forest	4594.24	57	2.8	3	1.8	NA	NA	morphospecie_27_57	sapling	NA	NA	NA	NA	NA	NA	NA	NA	82.286
383	27	-71.575	-13.089	2526	49.51	cloud forest	4594.24	58	2.1	1.8	0.8	Melastomataceae	Miconia	Miconia_sp55	shrub	NA	NA	NA	NA	NA	NA	NA	NA	44.11
384	27	-71.575	-13.089	2526	49.51	cloud forest	4594.24	59	3.8	1.3	1	Melastomataceae	Miconia	Miconia_sp55	shrub	NA	NA	NA	NA	NA	NA	NA	NA	60.091
385	27	-71.575	-13.089	2526	49.51	cloud forest	4594.24	60	1.9	1.6	0.8	Rubiaceae	NA	Rubiaceae_27_60	sapling	NA	NA	NA	NA	NA	NA	NA	NA	33.864
386	27	-71.575	-13.089	2526	49.51	cloud forest	4594.24	61	3.8	2	1.7	Melastomataceae	Miconia	Miconia_sp55	shrub	NA	NA	NA	NA	NA	NA	NA	NA	37.301
387	28	-71.574	-13.088	2542	40.84	cloud forest	4584.06	62	2.7	4	2.3	Rubiaceae	NA	Rubiaceae_28_62	sapling	NA	NA	NA	NA	NA	NA	NA	110.425	39.66
388	28	-71.574	-13.088	2542	40.84	cloud forest	4584.06	63	2.6	2	1.4	Melastomataceae	Miconia	Miconia_sp60	shrub	NA	NA	NA	NA	NA	NA	NA	114.029	67.364
389	28	-71.574	-13.088	2542	40.84	cloud forest	4584.06	64	5	4.8	4.2	Rubiaceae	NA	Rubiaceae_28_62	sapling	NA	NA	NA	NA	NA	NA	NA	NA	36.535
390	28	-71.574	-13.088	2542	40.84	cloud forest	4584.06	65	1.5	1.2	0.5	NA	NA	morphospecie_28_65	sapling	NA	NA	NA	NA	NA	NA	NA	72.014	97.249
391	28	-71.574	-13.088	2542	40.84	cloud forest	4584.06	66	1.3	1.3	NA	Rubiaceae	NA	Rubiaceae_28_62	sapling	NA	NA	NA	NA	NA	NA	NA	NA	46.128
392	28	-71.574	-13.088	2542	40.84	cloud forest	4584.06	67	1.4	1.2	0.4	Rubiaceae	NA	Rubiaceae_28_62	sapling	NA	NA	NA	NA	NA	NA	NA	NA	48.721
393	28	-71.574	-13.088	2542	40.84	cloud forest	4584.06	68	3.4	1.3	0.8	Primulaceae	NA	Primulaceae_28_68	sapling	NA	NA	NA	NA	NA	NA	NA	75.554	84.755
394	28	-71.574	-13.088	2542	40.84	cloud forest	4584.06	69	2.3	1.6	0.8	Rosaceae	NA	Rosaceae_28_69	sapling	NA	NA	NA	NA	NA	NA	NA	70.759	38.524
395	29	-71.58	-13.094	2532	36.79	cloud forest	4590.42	70	1.8	1.3	1	Rubiaceae	Faramea	Faramea_sp2	sapling	NA	NA	NA	NA	NA	NA	NA	NA	45.648
396	29	-71.58	-13.094	2532	36.79	cloud forest	4590.42	71	2.3	1.5	0.8	Melastomataceae	Miconia	Miconia_sp2	shrub	NA	NA	NA	NA	NA	NA	NA	NA	33.834
397	29	-71.58	-13.094	2532	36.79	cloud forest	4590.42	72	1.9	1.1	0.6	Melastomataceae	Miconia	Miconia_sp2	shrub	NA	NA	NA	NA	NA	NA	NA	NA	53.515
398	29	-71.58	-13.094	2532	36.79	cloud forest	4590.42	73	3.5	2.8	1.9	Rubiaceae	Psychotria	Psychotria_sp9	shrub	-0.865	4.487	-0.284	88.024	62.388	0.013	0.031	NA	28.717
399	29	-71.58	-13.094	2532	36.79	cloud forest	4590.42	74	3.1	2.5	1.7	Rubiaceae	Psychotria	Psychotria_sp9	shrub	NA	NA	NA	NA	NA	NA	NA	NA	29.031
400	29	-71.58	-13.094	2532	36.79	cloud forest	4590.42	75	2.4	2.7	1.2	Monimiaceae	Mollinedia	Mollinedia_ovata	shrub	NA	NA	NA	NA	NA	NA	NA	NA	63.178
401	29	-71.58	-13.094	2532	36.79	cloud forest	4590.42	76	2.8	3.4	1.5	Monimiaceae	Mollinedia	Mollinedia_ovata	shrub	NA	NA	NA	NA	NA	NA	NA	NA	32.623
402	29	-71.58	-13.094	2532	36.79	cloud forest	4590.42	77	1.1	1.5	NA	Rubiaceae	Faramea	Faramea_sp2	sapling	NA	NA	NA	NA	NA	NA	NA	NA	43.86
403	29	-71.58	-13.094	2532	36.79	cloud forest	4590.42	78	4.6	4.7	2.7	Rubiaceae	Psychotria	Psychotria_sp9	shrub	NA	NA	NA	NA	NA	NA	NA	NA	29.077
404	29	-71.58	-13.094	2532	36.79	cloud forest	4590.42	79	2.3	2.5	1.2	Monimiaceae	Mollinedia	Mollinedia_ovata	shrub	NA	NA	NA	NA	NA	NA	NA	NA	41.898
405	29	-71.58	-13.094	2532	36.79	cloud forest	4590.42	80	1.7	1.7	0.5	Rubiaceae	Psychotria	Psychotria_sp9	shrub	NA	NA	NA	NA	NA	NA	NA	NA	39.127
406	29	-71.58	-13.094	2532	36.79	cloud forest	4590.42	81	2.1	4.2	2.7	Monimiaceae	Mollinedia	Mollinedia_ovata	shrub	NA	NA	NA	NA	NA	NA	NA	NA	32.459
407	29	-71.58	-13.094	2532	36.79	cloud forest	4590.42	82	2.8	2.9	1.9	Monimiaceae	Mollinedia	Mollinedia_ovata	shrub	NA	NA	NA	NA	NA	NA	NA	NA	NA
408	29	-71.58	-13.094	2532	36.79	cloud forest	4590.42	83	1.9	2.1	0.9	Rubiaceae	Psychotria	Psychotria_sp9	shrub	NA	NA	NA	NA	NA	NA	NA	NA	NA
409	29	-71.58	-13.094	2532	36.79	cloud forest	4590.42	84	2.8	3.8	2.6	Rubiaceae	NA	Rubiaceae_27_60	sapling	NA	NA	NA	NA	NA	NA	NA	NA	48.471
410	30	-71.599	-13.104	3036	33.18	cloud forest	4021.19	85	1.8	1.3	1.2	Clusiaceae	NA	Clusiaceae_30_85	sapling	NA	NA	NA	NA	NA	NA	NA	NA	44.882
411	30	-71.599	-13.104	3036	33.18	cloud forest	4021.19	86	1.3	1.3	NA	Chloranthaceae	Hedyosmum	Hedyosmum_goudotianum	sapling	-0.332	4.165	-0.217	97.853	17.781	0.052	0.081	31.804	82.036
412	30	-71.599	-13.104	3036	33.18	cloud forest	4021.19	87	1.9	1.4	0.8	Melastomataceae	Miconia	Miconia_sp45	shrub	-0.837	2.521	-0.378	83.163	9.683	0.071	0.153	12.964	43.552
413	30	-71.599	-13.104	3036	33.18	cloud forest	4021.19	88	1.5	1.2	0.5	Melastomataceae	Miconia	Miconia_sp56	shrub	NA	NA	NA	NA	NA	NA	NA	NA	41.852
414	30	-71.599	-13.104	3036	33.18	cloud forest	4021.19	89	1.2	1.1	NA	Clusiaceae	NA	Clusiaceae_30_85	sapling	NA	NA	NA	NA	NA	NA	NA	NA	50.36
415	30	-71.599	-13.104	3036	33.18	cloud forest	4021.19	90	2.1	1.3	0.8	Melastomataceae	Miconia	Miconia_sp4	shrub	-0.601	3.013	-0.211	83.076	8.752	0.075	0.049	11.865	27.726
416	30	-71.599	-13.104	3036	33.18	cloud forest	4021.19	91	2.8	1.9	1.5	Melastomataceae	Miconia	Miconia_sp35	shrub	-0.71	2.62	-0.242	88.566	10.756	0.057	0.065	12.011	32.628
417	30	-71.599	-13.104	3036	33.18	cloud forest	4021.19	92	2.8	1.7	1.3	Melastomataceae	Miconia	Miconia_sp34	shrub	-0.615	1.535	-0.243	90.781	6.965	0.086	0.077	14.338	22.938
418	30	-71.599	-13.104	3036	33.18	cloud forest	4021.19	93	2.3	1.1	0.9	Melastomataceae	Miconia	Miconia_sp34	shrub	NA	NA	NA	NA	NA	NA	NA	14.887	33.051
419	30	-71.599	-13.104	3036	33.18	cloud forest	4021.19	94	2	1.2	0.8	Melastomataceae	Miconia	Miconia_sp34	shrub	NA	NA	NA	NA	NA	NA	NA	NA	27.853
420	31	-71.599	-13.104	3025	33.18	cloud forest	4044.79	95	2.3	1.9	1.1	Melastomataceae	Miconia	Miconia_sp34	shrub	-0.226	1.614	-0.069	96.256	6.458	0.075	0.047	140.903	26.819
421	31	-71.599	-13.104	3025	33.18	cloud forest	4044.79	96	2	1.7	1.1	Lauraceae	Persea	Persea_mutisii	sapling	-0.679	2.515	-0.197	89.016	52.459	0.018	0.063	10.992	33.086
422	31	-71.599	-13.104	3025	33.18	cloud forest	4044.79	97	2.3	1.9	1.1	Melastomataceae	Miconia	Miconia_sp34	shrub	-0.287	2.304	-0.132	97.445	58.933	0.018	0.05	NA	27.642
423	31	-71.599	-13.104	3025	33.18	cloud forest	4044.79	98	1.9	1.1	0.7	Melastomataceae	Miconia	Miconia_sp34	shrub	NA	NA	NA	NA	NA	NA	NA	NA	25.73
424	31	-71.599	-13.104	3025	33.18	cloud forest	4044.79	99	2.1	1.1	0.7	Melastomataceae	Miconia	Miconia_sp4	shrub	-0.503	2.387	-0.118	75.268	12.046	0.117	0.16	45.69	17.319
425	31	-71.599	-13.104	3025	33.18	cloud forest	4044.79	100	3.5	2.8	2.1	Melastomataceae	Miconia	Miconia_sp34	shrub	NA	NA	NA	NA	NA	NA	NA	NA	35.574
426	31	-71.599	-13.104	3025	33.18	cloud forest	4044.79	101	2.5	1.9	1.3	Melastomataceae	Miconia	Miconia_sp34	shrub	NA	NA	NA	NA	NA	NA	NA	NA	45.715
427	31	-71.599	-13.104	3025	33.18	cloud forest	4044.79	102	2.1	1.2	0.5	Melastomataceae	Miconia	Miconia_sp34	shrub	NA	NA	NA	NA	NA	NA	NA	NA	48.078
428	31	-71.599	-13.104	3025	33.18	cloud forest	4044.79	103	2.1	1.2	0.8	Lauraceae	Beilschmiedia	Beilschmiedia_sp1	sapling	-0.566	2.395	-0.545	95.716	52.808	0.019	4.082	9.6	31.324
429	31	-71.599	-13.104	3025	33.18	cloud forest	4044.79	104	1.7	1.2	0.6	Lauraceae	Persea	Persea_mutisii	sapling	-0.692	2.324	-0.591	91.901	59.704	0.018	58.292	9.968	34.502
430	31	-71.599	-13.104	3025	33.18	cloud forest	4044.79	105	2	1.2	0.8	Rubiaceae	Psychotria	Psychotria_sp7	shrub	NA	NA	NA	NA	NA	NA	NA	34.599	50.166
431	31	-71.599	-13.104	3025	33.18	cloud forest	4044.79	106	2.1	1.2	0.9	Rubiaceae	NA	Rubiaceae_31_106	sapling	-0.219	2.911	-0.124	96.715	4.155	0.145	0.143	62.684	58.522
432	32	-71.599	-13.104	3006	33.18	cloud forest	4083.68	107	3.5	3	1.6	Chloranthaceae	Hedyosmum	Hedyosmum_translucidum	sapling	-0.603	4.838	-0.39	91.172	22.155	0.04	0.243	NA	64.65
433	32	-71.599	-13.104	3006	33.18	cloud forest	4083.68	108	1.7	2.3	1.5	Chloranthaceae	Hedyosmum	Hedyosmum_goudotianum	sapling	-1.038	4.322	-0.706	92.922	353.26	0.003	0.121	NA	62.337
434	32	-71.599	-13.104	3006	33.18	cloud forest	4083.68	109	1.1	1.3	NA	Clusiaceae	Clusia	Clusia_sp4	sapling	-0.598	7.131	-0.418	97.862	46.096	0.019	0.083	NA	61.065
435	32	-71.599	-13.104	3006	33.18	cloud forest	4083.68	110	1.2	1.4	NA	Clusiaceae	Clusia	Clusia_sp4	sapling	NA	NA	NA	NA	NA	NA	NA	NA	55.904
436	32	-71.599	-13.104	3006	33.18	cloud forest	4083.68	111	2.8	3.3	2.5	Chloranthaceae	Hedyosmum	Hedyosmum_sp5	sapling	NA	NA	NA	NA	NA	NA	NA	NA	53.277
437	32	-71.599	-13.104	3006	33.18	cloud forest	4083.68	112	1.5	1.5	1.1	Clusiaceae	Clusia	Clusia_sp4	sapling	NA	NA	NA	NA	NA	NA	NA	NA	60.481
438	32	-71.599	-13.104	3006	33.18	cloud forest	4083.68	113	1	1.1	NA	Clusiaceae	Clusia	Clusia_obovata	sapling	-0.497	13.672	-0.215	95.58	17.64	0.039	0.054	NA	56.587
439	32	-71.599	-13.104	3006	33.18	cloud forest	4083.68	114	1.6	1.5	1.3	Clusiaceae	Clusia	Clusia_sp4	sapling	NA	NA	NA	NA	NA	NA	NA	NA	57.079
440	32	-71.599	-13.104	3006	33.18	cloud forest	4083.68	115	0.9	1.7	NA	Clusiaceae	Clusia	Clusia_sp4	sapling	NA	NA	NA	NA	NA	NA	NA	NA	63.631
441	32	-71.599	-13.104	3006	33.18	cloud forest	4083.68	116	1.5	1.2	0.9	Melastomataceae	Miconia	Miconia_sp13	shrub	NA	NA	NA	NA	NA	NA	NA	NA	24.582
442	32	-71.599	-13.104	3006	33.18	cloud forest	4083.68	117	2.2	1.4	1	Chloranthaceae	Hedyosmum	Hedyosmum_translucidum	sapling	-0.427	4.679	-0.24	89.823	37.687	0.043	0.271	31.205	37.69
443	32	-71.599	-13.104	3006	33.18	cloud forest	4083.68	118	1.4	1.7	0.9	Chloranthaceae	Hedyosmum	Hedyosmum_sp5	sapling	NA	NA	NA	NA	NA	NA	NA	NA	65.512
444	33	-71.597	-13.098	2933	8.27	cloud forest	4213.05	119	4	4.4	3	Chloranthaceae	Hedyosmum	Hedyosmum_sp6	sapling	NA	NA	NA	NA	NA	NA	NA	45.575	48.688
445	33	-71.597	-13.098	2933	8.27	cloud forest	4213.05	120	2.2	1.3	1	Melastomataceae	Miconia	Miconia_sp57	shrub	NA	NA	NA	NA	NA	NA	NA	NA	33.994
446	33	-71.597	-13.098	2933	8.27	cloud forest	4213.05	121	2.7	1.4	0.9	Melastomataceae	Miconia	Miconia_sp57	shrub	NA	NA	NA	NA	NA	NA	NA	NA	34.641
447	33	-71.597	-13.098	2933	8.27	cloud forest	4213.05	122	1.3	1.2	NA	Clusiaceae	Clusia	Clusia_sp5	sapling	NA	NA	NA	NA	NA	NA	NA	27.958	50.39
448	33	-71.597	-13.098	2933	8.27	cloud forest	4213.05	123	1.5	1.2	0.7	Chloranthaceae	Hedyosmum	Hedyosmum_sp6	sapling	NA	NA	NA	NA	NA	NA	NA	NA	54.63
449	33	-71.597	-13.098	2933	8.27	cloud forest	4213.05	124	1.6	1	0.5	NA	NA	morphospecie_33_124	sapling	NA	NA	NA	NA	NA	NA	NA	NA	52.529
450	33	-71.597	-13.098	2933	8.27	cloud forest	4213.05	125	2.8	2.2	1.6	Chloranthaceae	Hedyosmum	Hedyosmum_sp6	sapling	NA	NA	NA	NA	NA	NA	NA	NA	33.665
451	33	-71.597	-13.098	2933	8.27	cloud forest	4213.05	126	1.3	1.5	0.3	Chloranthaceae	Hedyosmum	Hedyosmum_sp6	sapling	NA	NA	NA	NA	NA	NA	NA	NA	47.873
452	33	-71.597	-13.098	2933	8.27	cloud forest	4213.05	127	1.5	1.4	0.6	Melastomataceae	Miconia	Miconia_sp57	shrub	NA	NA	NA	NA	NA	NA	NA	114.393	35.927
453	33	-71.597	-13.098	2933	8.27	cloud forest	4213.05	128	1.4	1.2	0.3	Melastomataceae	Miconia	Miconia_sp57	shrub	NA	NA	NA	NA	NA	NA	NA	18.984	56.582
454	34	-71.56	-13.07	2064	30.94	cloud forest	4973.12	129	2.8	3.8	1.4	Rubiaceae	Palicourea	Palicourea_sp2	sapling	NA	NA	NA	NA	NA	NA	NA	NA	47.878
455	34	-71.56	-13.07	2064	30.94	cloud forest	4973.12	130	2.5	1.2	1.1	Clusiaceae	Clusia	Clusia_ducuoides	sapling	NA	NA	NA	NA	NA	NA	NA	NA	45.167
456	34	-71.56	-13.07	2064	30.94	cloud forest	4973.12	131	3.5	3.6	2.6	Clusiaceae	Tovomita	Tovomita_weddelliana	sapling	NA	NA	NA	NA	NA	NA	NA	NA	54.855
457	34	-71.56	-13.07	2064	30.94	cloud forest	4973.12	132	3.8	4.3	2.5	Rubiaceae	Palicourea	Palicourea_sp2	sapling	NA	NA	NA	NA	NA	NA	NA	NA	54.055
458	34	-71.56	-13.07	2064	30.94	cloud forest	4973.12	133	3.5	2.8	2.1	Rosaceae	Prunus	Prunus_pleiantha	sapling	NA	NA	NA	NA	NA	NA	NA	NA	41.253
459	34	-71.56	-13.07	2064	30.94	cloud forest	4973.12	134	2.3	2	1.3	Asteraceae	Baccharis	Baccharis_sp1	shrub	NA	NA	NA	NA	NA	NA	NA	NA	83.596
460	34	-71.56	-13.07	2064	30.94	cloud forest	4973.12	135	4	2.5	2.4	Clusiaceae	Clusia	Clusia_sp6	sapling	NA	NA	NA	NA	NA	NA	NA	NA	NA
461	34	-71.56	-13.07	2064	30.94	cloud forest	4973.12	136	1.5	1.1	0.9	Clusiaceae	Clusia	Clusia_sp6	sapling	NA	NA	NA	NA	NA	NA	NA	NA	33.956
462	34	-71.56	-13.07	2064	30.94	cloud forest	4973.12	137	3.8	1.8	1.5	Lauraceae	Persea	Persea_mutisii	sapling	NA	NA	NA	NA	NA	NA	NA	NA	33.263
463	34	-71.56	-13.07	2064	30.94	cloud forest	4973.12	138	2.9	1.3	1.2	Asteraceae	Baccharis	Baccharis_sp1	shrub	NA	NA	NA	NA	NA	NA	NA	NA	69.772
464	34	-71.56	-13.07	2064	30.94	cloud forest	4973.12	139	4	1.8	1.7	Rubiaceae	Palicourea	Palicourea_sp2	sapling	NA	NA	NA	NA	NA	NA	NA	NA	NA
465	34	-71.56	-13.07	2064	30.94	cloud forest	4973.12	140	5.5	3.4	3.2	Primulaceae	Myrsine	Myrsine_andina	shrub	NA	NA	NA	NA	NA	NA	NA	NA	44.237
466	35	-71.56	-13.07	2048	30.94	cloud forest	4991.47	141	2.7	2.2	2	Clusiaceae	Clusia	Clusia_sp7	sapling	NA	NA	NA	NA	NA	NA	NA	NA	43.822
467	35	-71.56	-13.07	2048	30.94	cloud forest	4991.47	142	5.5	2	2.3	Rubiaceae	Psychotria	Psychotria_sp8	shrub	NA	NA	NA	NA	NA	NA	NA	NA	60.376
468	35	-71.56	-13.07	2048	30.94	cloud forest	4991.47	143	4.5	2.2	1.6	Rubiaceae	Psychotria	Psychotria_sp8	shrub	NA	NA	NA	NA	NA	NA	NA	56.679	50.93
469	35	-71.56	-13.07	2048	30.94	cloud forest	4991.47	144	5	4.4	3.4	Aquifoliaceae	Ilex	Ilex_microdonta	sapling	NA	NA	NA	NA	NA	NA	NA	15.474	42.011
470	35	-71.56	-13.07	2048	30.94	cloud forest	4991.47	145	2.3	1.7	0.9	Aquifoliaceae	Ilex	Ilex_microdonta	sapling	NA	NA	NA	NA	NA	NA	NA	NA	42.688
471	35	-71.56	-13.07	2048	30.94	cloud forest	4991.47	146	2	1.7	0.9	Lauraceae	Persea	Persea_mutisii	sapling	NA	NA	NA	NA	NA	NA	NA	10.628	37.379
472	35	-71.56	-13.07	2048	30.94	cloud forest	4991.47	147	3.2	2	1.3	Lauraceae	Persea	Persea_mutisii	sapling	NA	NA	NA	NA	NA	NA	NA	14.405	41.961
473	35	-71.56	-13.07	2048	30.94	cloud forest	4991.47	148	2	1.3	0.8	Melastomataceae	Miconia	Miconia_sp20	shrub	NA	NA	NA	NA	NA	NA	NA	NA	43.171
474	35	-71.56	-13.07	2048	30.94	cloud forest	4991.47	149	4.8	1.8	1.4	Melastomataceae	Miconia	Miconia_sp5	shrub	NA	NA	NA	NA	NA	NA	NA	52.607	69.99
475	35	-71.56	-13.07	2048	30.94	cloud forest	4991.47	150	3.7	2.4	1.7	Styracaceae	Styrax	Styrax_sieberi	sapling	NA	NA	NA	NA	NA	NA	NA	12.649	32.514
476	35	-71.56	-13.07	2048	30.94	cloud forest	4991.47	151	3.5	2.1	1.6	Annonaceae	Guatteria	Guatteria_terminalis	sapling	NA	NA	NA	NA	NA	NA	NA	19.314	57.501
477	35	-71.56	-13.07	2048	30.94	cloud forest	4991.47	152	2.5	1.7	1.2	Aquifoliaceae	Ilex	Ilex_microdonta	sapling	NA	NA	NA	NA	NA	NA	NA	NA	51.625
478	35	-71.56	-13.07	2048	30.94	cloud forest	4991.47	153	3.5	2.2	1.7	Lauraceae	Persea	Persea_mutisii	sapling	NA	NA	NA	NA	NA	NA	NA	16.159	49.661
479	35	-71.56	-13.07	2048	30.94	cloud forest	4991.47	154	2.9	2	1	Aquifoliaceae	Ilex	Ilex_microdonta	sapling	NA	NA	NA	NA	NA	NA	NA	NA	54.017
480	36	-71.559	-13.068	1994	35.94	cloud forest	5056.33	155	4.2	4.5	2.1	Melastomataceae	Miconia	Miconia_sp1	shrub	NA	NA	NA	NA	NA	NA	NA	NA	38.835
481	36	-71.559	-13.068	1994	35.94	cloud forest	5056.33	156	2.8	2.6	2.1	Clusiaceae	Clusia	Clusia_ducuoides	sapling	NA	NA	NA	NA	NA	NA	NA	NA	52.5
482	36	-71.559	-13.068	1994	35.94	cloud forest	5056.33	157	2.1	1.4	1.2	Asteraceae	Baccharis	Baccharis_sp1	shrub	NA	NA	NA	NA	NA	NA	NA	NA	76.89
483	36	-71.559	-13.068	1994	35.94	cloud forest	5056.33	158	3.5	4.4	2.9	Rubiaceae	Psychotria	Psychotria_sp8	shrub	NA	NA	NA	NA	NA	NA	NA	NA	38.149
484	36	-71.559	-13.068	1994	35.94	cloud forest	5056.33	159	1.2	1	NA	Melastomataceae	Miconia	Miconia_sp18	shrub	NA	NA	NA	NA	NA	NA	NA	NA	51.937
485	36	-71.559	-13.068	1994	35.94	cloud forest	5056.33	160	5	2.9	1.8	Araliaceae	Schefflera	Schefflera_sp2	sapling	NA	NA	NA	NA	NA	NA	NA	NA	NA
486	36	-71.559	-13.068	1994	35.94	cloud forest	5056.33	161	1.2	2.9	NA	Melastomataceae	Miconia	Miconia_sp18	shrub	NA	NA	NA	NA	NA	NA	NA	NA	55.397
487	36	-71.559	-13.068	1994	35.94	cloud forest	5056.33	162	2.1	1.4	1.2	Melastomataceae	Miconia	Miconia_sp18	shrub	NA	NA	NA	NA	NA	NA	NA	NA	46.21
488	36	-71.559	-13.068	1994	35.94	cloud forest	5056.33	163	2.3	1.4	1.7	Rosaceae	Prunus	Prunus_pleiantha	sapling	NA	NA	NA	NA	NA	NA	NA	NA	60.508
489	36	-71.559	-13.068	1994	35.94	cloud forest	5056.33	164	2.2	1	0.8	Clusiaceae	Clusia	Clusia_ducuoides	sapling	NA	NA	NA	NA	NA	NA	NA	NA	49.601
490	36	-71.559	-13.068	1994	35.94	cloud forest	5056.33	165	2.1	1.2	0.8	Clusiaceae	Clusia	Clusia_ducuoides	sapling	NA	NA	NA	NA	NA	NA	NA	NA	53.551
491	37	-71.559	-13.067	1992	15.06	cloud forest	5058.82	166	2.8	2.5	1.9	Clusiaceae	Clusia	Clusia_thurifera	sapling	NA	NA	NA	NA	NA	NA	NA	NA	69.748
492	37	-71.559	-13.067	1992	15.06	cloud forest	5058.82	167	1.9	2.1	1.4	Clusiaceae	Tovomita	Tovomita_weddelliana	sapling	NA	NA	NA	NA	NA	NA	NA	19.099	65.392
493	37	-71.559	-13.067	1992	15.06	cloud forest	5058.82	168	1.6	1.1	0.5	Alzateaceae	Alzatea	Alzatea_verticillata	sapling	NA	NA	NA	NA	NA	NA	NA	37.769	58.16
494	37	-71.559	-13.067	1992	15.06	cloud forest	5058.82	169	1.9	1.2	0.7	Rubiaceae	Psychotria	Psychotria_conephoroides	shrub	NA	NA	NA	NA	NA	NA	NA	21.978	79.921
495	37	-71.559	-13.067	1992	15.06	cloud forest	5058.82	170	1.8	1.5	0.7	Annonaceae	Guatteria	Guatteria_terminalis	sapling	NA	NA	NA	NA	NA	NA	NA	16.448	47.73
496	37	-71.559	-13.067	1992	15.06	cloud forest	5058.82	171	1.7	1.5	1.2	Clusiaceae	Clusia	Clusia_thurifera	sapling	NA	NA	NA	NA	NA	NA	NA	NA	49.489
497	37	-71.559	-13.067	1992	15.06	cloud forest	5058.82	172	3.8	2.5	2	Melastomataceae	Miconia	Miconia_sp5	shrub	NA	NA	NA	NA	NA	NA	NA	51.749	77.779
498	37	-71.559	-13.067	1992	15.06	cloud forest	5058.82	173	1.6	1.5	0.7	NA	NA	morphospecie_37_173	sapling	NA	NA	NA	NA	NA	NA	NA	NA	NA
499	37	-71.559	-13.067	1992	15.06	cloud forest	5058.82	174	3.8	1.9	1.7	Clusiaceae	Clusia	Clusia_thurifera	sapling	NA	NA	NA	NA	NA	NA	NA	17.405	48.621
500	37	-71.559	-13.067	1992	15.06	cloud forest	5058.82	175	1.2	1.5	NA	Clusiaceae	Clusia	Clusia_thurifera	sapling	NA	NA	NA	NA	NA	NA	NA	NA	52.294
501	37	-71.559	-13.067	1992	15.06	cloud forest	5058.82	176	2.3	1.6	0.8	Annonaceae	Guatteria	Guatteria_terminalis	sapling	NA	NA	NA	NA	NA	NA	NA	NA	49.846
502	37	-71.559	-13.067	1992	15.06	cloud forest	5058.82	177	3.8	1.5	1.4	Melastomataceae	Miconia	Miconia_sp33	shrub	NA	NA	NA	NA	NA	NA	NA	44.146	55.14
503	37	-71.559	-13.067	1992	15.06	cloud forest	5058.82	178	2.4	1	0.7	Rubiaceae	Palicourea	Palicourea_lineata	sapling	NA	NA	NA	NA	NA	NA	NA	28.809	65.934
504	37	-71.559	-13.067	1992	15.06	cloud forest	5058.82	179	3.5	1.9	1.1	Sapindaceae	Talisia	Talisia_cerasina	sapling	NA	NA	NA	NA	NA	NA	NA	12.783	39.504
505	37	-71.559	-13.067	1992	15.06	cloud forest	5058.82	180	3.8	2.2	1.3	Annonaceae	Guatteria	Guatteria_terminalis	sapling	NA	NA	NA	NA	NA	NA	NA	NA	52.069
506	38	-71.556	-13.065	1891	13.54	cloud forest	5191.48	181	1.4	1.2	0.7	Gesneriaceae	Besleria	Besleria_sp2	shrub	NA	NA	NA	NA	NA	NA	NA	61.84	62.862
507	38	-71.556	-13.065	1891	13.54	cloud forest	5191.48	182	1.7	1.4	0.6	Rubiaceae	Palicourea	Palicourea_stipularis	sapling	NA	NA	NA	NA	NA	NA	NA	17.632	61.969
508	38	-71.556	-13.065	1891	13.54	cloud forest	5191.48	183	1.7	1.4	0.7	Lauraceae	Licaria	Licaria_sp1	sapling	-0.904	3.256	-0.468	84.671	6.485	0.093	0.166	23.879	67.59
509	38	-71.556	-13.065	1891	13.54	cloud forest	5191.48	184	3.6	2.1	1.6	Lauraceae	Licaria	Licaria_sp1	sapling	NA	NA	NA	NA	NA	NA	NA	5.661	25.99
510	38	-71.556	-13.065	1891	13.54	cloud forest	5191.48	185	1.5	1.5	0.4	Melastomataceae	Miconia	Miconia_sp33	shrub	NA	NA	NA	NA	NA	NA	NA	18.364	51.588
511	38	-71.556	-13.065	1891	13.54	cloud forest	5191.48	186	2.5	2.1	0.9	Melastomataceae	Miconia	Miconia_sp23	shrub	NA	NA	NA	NA	NA	NA	NA	NA	38.228
512	38	-71.556	-13.065	1891	13.54	cloud forest	5191.48	187	5.5	3	2.2	Lauraceae	Persea	Persea_mutisii	sapling	NA	NA	NA	NA	NA	NA	NA	6.413	30.231
513	38	-71.556	-13.065	1891	13.54	cloud forest	5191.48	188	2.4	1.7	1.2	Burseraceae	Protium	Protium_sp1	sapling	-0.646	1.562	-0.231	92.095	9.196	0.061	0.049	7.282	41.461
514	38	-71.556	-13.065	1891	13.54	cloud forest	5191.48	189	2.8	1.7	1.4	Melastomataceae	Miconia	Miconia_sp5	shrub	NA	NA	NA	NA	NA	NA	NA	NA	46.796
515	38	-71.556	-13.065	1891	13.54	cloud forest	5191.48	190	2.8	2.3	2	Melastomataceae	Miconia	Miconia_sp18	shrub	NA	NA	NA	NA	NA	NA	NA	NA	66.017
516	38	-71.556	-13.065	1891	13.54	cloud forest	5191.48	191	3.5	2.9	2.6	Clusiaceae	Clusia	Clusia_thurifera	sapling	NA	NA	NA	NA	NA	NA	NA	13.163	38.835
517	38	-71.556	-13.065	1891	13.54	cloud forest	5191.48	192	1.6	1.7	1.5	Clusiaceae	Clusia	Clusia_thurifera	sapling	NA	NA	NA	NA	NA	NA	NA	NA	46.493
518	38	-71.556	-13.065	1891	13.54	cloud forest	5191.48	193	2.1	1.7	1	Melastomataceae	Miconia	Miconia_sp33	shrub	-0.62	3.148	-0.396	96.465	12.665	0.058	0.077	17.456	41.034
519	38	-71.556	-13.065	1891	13.54	cloud forest	5191.48	194	3.3	2.3	1.8	Rubiaceae	Palicourea	Palicourea_sp2	sapling	-0.377	2.605	-0.294	98.583	44.569	0.02	0.079	NA	45.419
520	38	-71.556	-13.065	1891	13.54	cloud forest	5191.48	195	5.5	3.4	2.9	Clusiaceae	Clusia	Clusia_thurifera	sapling	-0.726	2.649	-0.528	97.164	25.585	0.039	0.085	20.181	56.38
521	38	-71.556	-13.065	1891	13.54	cloud forest	5191.48	196	1.3	2.1	NA	Clusiaceae	Clusia	Clusia_thurifera	sapling	NA	NA	NA	NA	NA	NA	NA	NA	35.316
522	38	-71.556	-13.065	1891	13.54	cloud forest	5191.48	197	1.6	1.5	1.1	Lauraceae	Persea	Persea_mutisii	sapling	-1.107	2.882	-0.474	89.761	54.371	0.017	0.057	NA	38.45
523	38	-71.556	-13.065	1891	13.54	cloud forest	5191.48	198	2.8	2.5	1.8	Aquifoliaceae	Ilex	Ilex_microdonta	sapling	-0.517	2.041	-0.239	91.658	44.542	0.021	0.084	39.167	39.331
524	38	-71.556	-13.065	1891	13.54	cloud forest	5191.48	199	1.6	1.3	1.1	Melastomataceae	Miconia	Miconia_sp18	shrub	NA	NA	NA	NA	NA	NA	NA	NA	49.039
525	38	-71.556	-13.065	1891	13.54	cloud forest	5191.48	200	3	2.9	2.2	Aquifoliaceae	Ilex	Ilex_microdonta	sapling	NA	NA	NA	NA	NA	NA	NA	NA	51.095
526	38	-71.556	-13.065	1891	13.54	cloud forest	5191.48	201	2.5	2	1.1	Annonaceae	Guatteria	Guatteria_terminalis	sapling	-0.299	2.232	-0.157	95.736	23.759	0.038	0.069	8.153	40.635
527	38	-71.556	-13.065	1891	13.54	cloud forest	5191.48	202	1.4	1.3	0.8	Melastomataceae	Miconia	Miconia_sp18	shrub	NA	NA	NA	NA	NA	NA	NA	9.343	64.687
528	39	-71.556	-13.066	1920	35.06	cloud forest	5152.04	203	1.4	1.2	1	Melastomataceae	Miconia	Miconia_sp33	shrub	NA	NA	NA	NA	NA	NA	NA	NA	49.519
529	39	-71.556	-13.066	1920	35.06	cloud forest	5152.04	204	2.2	1.5	1.1	Melastomataceae	Miconia	Miconia_sp33	shrub	NA	NA	NA	NA	NA	NA	NA	NA	50.035
530	39	-71.556	-13.066	1920	35.06	cloud forest	5152.04	205	3.2	1.8	1.2	Rubiaceae	Palicourea	Palicourea_lineata	sapling	NA	NA	NA	NA	NA	NA	NA	NA	65.084
531	39	-71.556	-13.066	1920	35.06	cloud forest	5152.04	206	2.1	1.7	1.1	Melastomataceae	Miconia	Miconia_sp33	shrub	NA	NA	NA	NA	NA	NA	NA	NA	43.329
532	39	-71.556	-13.066	1920	35.06	cloud forest	5152.04	207	2.9	2.5	1.5	Melastomataceae	Miconia	Miconia_sp33	shrub	NA	NA	NA	NA	NA	NA	NA	NA	NA
533	39	-71.556	-13.066	1920	35.06	cloud forest	5152.04	208	2.6	4.4	3.3	Clusiaceae	Clusia	Clusia_sp1	sapling	NA	NA	NA	NA	NA	NA	NA	NA	32.82
534	39	-71.556	-13.066	1920	35.06	cloud forest	5152.04	209	2	2.1	1.3	Melastomataceae	Miconia	Miconia_sp33	shrub	NA	NA	NA	NA	NA	NA	NA	NA	35.168
535	39	-71.556	-13.066	1920	35.06	cloud forest	5152.04	210	3.6	2.9	1.7	Aquifoliaceae	Ilex	Ilex_microdonta	sapling	NA	NA	NA	NA	NA	NA	NA	NA	43.523
536	39	-71.556	-13.066	1920	35.06	cloud forest	5152.04	211	3.4	2.2	1.3	Lauraceae	Persea	Persea_mutisii	sapling	NA	NA	NA	NA	NA	NA	NA	NA	35.995
537	39	-71.556	-13.066	1920	35.06	cloud forest	5152.04	212	3.6	1.2	1	Euphorbiaceae	Alchornea	Alchornea_triplinervia	sapling	NA	NA	NA	NA	NA	NA	NA	NA	31.696
538	39	-71.556	-13.066	1920	35.06	cloud forest	5152.04	213	2.7	2	1.1	Melastomataceae	Miconia	Miconia_sp1	shrub	NA	NA	NA	NA	NA	NA	NA	NA	47.946
539	39	-71.556	-13.066	1920	35.06	cloud forest	5152.04	214	1.7	1.5	1.8	Melastomataceae	Miconia	Miconia_sp20	shrub	NA	NA	NA	NA	NA	NA	NA	NA	40.635
540	40	-71.555	-13.065	1839	4.68	cloud forest	5264.5	215	1.5	2.2	1.4	Clusiaceae	Clusia	Clusia_sp8	sapling	NA	NA	NA	NA	NA	NA	NA	NA	43.654
541	40	-71.555	-13.065	1839	4.68	cloud forest	5264.5	216	4	4.1	4.1	Lauraceae	Nectandra	Nectandra_cuspidata	sapling	-1.32	1.406	-0.661	77.763	13.856	0.054	0.159	10.993	41.286
542	40	-71.555	-13.065	1839	4.68	cloud forest	5264.5	217	4	2.2	1.7	Araliaceae	Schefflera	Schefflera_patula	sapling	-0.678	2.509	-0.374	95.306	149.3	0.006	0.069	10.272	32.788
543	40	-71.555	-13.065	1839	4.68	cloud forest	5264.5	218	1.6	1.5	0.8	Araliaceae	Schefflera	Schefflera_patula	sapling	-0.644	3.137	-0.257	91.694	43.914	0.024	0.066	NA	42.619
544	40	-71.555	-13.065	1839	4.68	cloud forest	5264.5	219	2.8	2	1	Myrtaceae	Myrcia	Myrcia_fallax	sapling	-1.456	1.863	-0.265	59.774	18.918	0.032	0.042	11.392	33.542
545	40	-71.555	-13.065	1839	4.68	cloud forest	5264.5	220	2.3	1.7	0.4	Myrtaceae	Myrcia	Myrcia_fallax	sapling	-1.28	2.309	-0.21	68.132	20.496	0.029	0.042	NA	32.126
546	40	-71.555	-13.065	1839	4.68	cloud forest	5264.5	221	2.2	3	1.1	Rubiaceae	Elaeagia	Elaeagia_mariae	sapling	-0.978	2.245	-0.283	71.96	31.122	0.029	0.07	31.346	85.354
547	40	-71.555	-13.065	1839	4.68	cloud forest	5264.5	222	2.2	1.5	0.7	Rubiaceae	Elaeagia	Elaeagia_mariae	sapling	-0.881	2.781	-0.312	83.14	21.382	0.033	0.065	15.827	82.31
548	40	-71.555	-13.065	1839	4.68	cloud forest	5264.5	223	3.3	1.3	1.1	Euphorbiaceae	Alchornea	Alchornea_anamariae	sapling	-0.743	1.944	-0.324	89.063	10.262	0.062	0.068	25.521	53.516
549	40	-71.555	-13.065	1839	4.68	cloud forest	5264.5	224	2.5	3.6	2	Clusiaceae	Tovomita	Tovomita_weddelliana	sapling	-0.469	3.376	-0.36	98.172	43.368	0.02	0.094	NA	34.038
550	40	-71.555	-13.065	1839	4.68	cloud forest	5264.5	225	1.8	1.6	1.3	Clusiaceae	Tovomita	Tovomita_weddelliana	sapling	-0.833	5.067	-0.513	91.45	14.559	0.051	0.121	NA	58.318
551	40	-71.555	-13.065	1839	4.68	cloud forest	5264.5	226	4	3.7	2.3	Rubiaceae	Psychotria	Psychotria_conephoroides	shrub	-0.72	3.241	-0.315	89.243	5.382	0.133	0.089	36.244	59.097
552	40	-71.555	-13.065	1839	4.68	cloud forest	5264.5	227	1.6	1.3	0.4	Myrtaceae	Myrcia	Myrcia_fallax	sapling	-1.17	3.028	-0.321	67.081	7.819	0.071	0.089	18.307	69.694
553	40	-71.555	-13.065	1839	4.68	cloud forest	5264.5	228	1.7	1.3	0.6	Burseraceae	Protium	Protium_montanum	sapling	-1.056	2.043	-0.4	78.477	11.904	0.057	0.106	13.372	42.536
554	40	-71.555	-13.065	1839	4.68	cloud forest	5264.5	229	1.2	1.2	NA	Clusiaceae	Tovomita	Tovomita_weddelliana	sapling	NA	NA	NA	NA	NA	NA	NA	15.796	56.755
555	41	-71.555	-13.064	1820	22.78	cloud forest	5291.81	230	2.7	2.1	1	Rubiaceae	Psychotria	Psychotria_conephoroides	shrub	NA	NA	NA	NA	NA	NA	NA	NA	52.221
556	41	-71.555	-13.064	1820	22.78	cloud forest	5291.81	231	4.5	2.2	1.4	Myrtaceae	Myrcia	Myrcia_fallax	sapling	NA	NA	NA	NA	NA	NA	NA	NA	41.289
557	41	-71.555	-13.064	1820	22.78	cloud forest	5291.81	232	2.6	1.4	0.6	Myrtaceae	Myrcia	Myrcia_fallax	sapling	NA	NA	NA	NA	NA	NA	NA	NA	33.343
558	41	-71.555	-13.064	1820	22.78	cloud forest	5291.81	233	4.5	3.3	2	Rubiaceae	Palicourea	Palicourea_lineata	sapling	NA	NA	NA	NA	NA	NA	NA	NA	52.231
559	41	-71.555	-13.064	1820	22.78	cloud forest	5291.81	234	3.5	2.4	1.6	Myrtaceae	Myrcia	Myrcia_fallax	sapling	NA	NA	NA	NA	NA	NA	NA	NA	36.252
560	41	-71.555	-13.064	1820	22.78	cloud forest	5291.81	235	1.7	1.1	0.6	Melastomataceae	Miconia	Miconia_sp21	shrub	NA	NA	NA	NA	NA	NA	NA	NA	52.534
561	41	-71.555	-13.064	1820	22.78	cloud forest	5291.81	236	3.6	2.4	2.1	Clusiaceae	Tovomita	Tovomita_weddelliana	sapling	NA	NA	NA	NA	NA	NA	NA	NA	31.68
562	41	-71.555	-13.064	1820	22.78	cloud forest	5291.81	237	3.6	2	1.4	Myrtaceae	Eugenia	Eugenia_biflora	sapling	NA	NA	NA	NA	NA	NA	NA	NA	69.245
563	41	-71.555	-13.064	1820	22.78	cloud forest	5291.81	238	4	3.7	2.2	Myrtaceae	Myrcia	Myrcia_fallax	sapling	NA	NA	NA	NA	NA	NA	NA	NA	31.749
564	41	-71.555	-13.064	1820	22.78	cloud forest	5291.81	239	4	3	2.2	Rubiaceae	Psychotria	Psychotria_conephoroides	shrub	NA	NA	NA	NA	NA	NA	NA	NA	56.21
565	41	-71.555	-13.064	1820	22.78	cloud forest	5291.81	240	4.2	1.8	1.7	Myrtaceae	Myrcia	Myrcia_fallax	sapling	NA	NA	NA	NA	NA	NA	NA	NA	31.634
566	41	-71.555	-13.064	1820	22.78	cloud forest	5291.81	241	4.5	3.4	2.1	Melastomataceae	Miconia	Miconia_sp1	shrub	NA	NA	NA	NA	NA	NA	NA	NA	37.871
567	41	-71.555	-13.064	1820	22.78	cloud forest	5291.81	242	2.3	1.3	0.7	Melastomataceae	Miconia	Miconia_sp1	shrub	NA	NA	NA	NA	NA	NA	NA	NA	36.145
568	41	-71.555	-13.064	1820	22.78	cloud forest	5291.81	243	2.2	1.4	0.9	Melastomataceae	Miconia	Miconia_sp23	shrub	NA	NA	NA	NA	NA	NA	NA	NA	34.587
569	41	-71.555	-13.064	1820	22.78	cloud forest	5291.81	244	2.6	2.7	1.9	Rubiaceae	Psychotria	Psychotria_sp11	shrub	NA	NA	NA	NA	NA	NA	NA	NA	40.629
570	41	-71.555	-13.064	1820	22.78	cloud forest	5291.81	245	1.5	1.2	0.5	Myrtaceae	Myrcia	Myrcia_rostrata	sapling	NA	NA	NA	NA	NA	NA	NA	NA	56.346
571	41	-71.555	-13.064	1820	22.78	cloud forest	5291.81	246	0.8	1.3	NA	Melastomataceae	Miconia	Miconia_sp58	shrub	NA	NA	NA	NA	NA	NA	NA	NA	48.528
572	42	-71.565	-13.074	2217	38.65	cloud forest	4818.01	247	2.2	1.5	0.9	Euphorbiaceae	Alchornea	Alchornea_sp3	sapling	NA	NA	NA	NA	NA	NA	NA	NA	28.257
573	42	-71.565	-13.074	2217	38.65	cloud forest	4818.01	248	1.7	1.2	1.1	Rubiaceae	Palicourea	Palicourea_lineata	sapling	-0.965	4.996	-0.407	74.478	11.782	0.064	0.186	NA	57.943
574	42	-71.565	-13.074	2217	38.65	cloud forest	4818.01	249	1.8	0.6	1.4	Melastomataceae	Miconia	Miconia_sp30	shrub	-1.292	2.715	-0.576	83	33.028	0.024	0.097	NA	71.974
575	42	-71.565	-13.074	2217	38.65	cloud forest	4818.01	250	2.5	1.7	1.2	Rubiaceae	Palicourea	Palicourea_lineata	sapling	NA	NA	NA	NA	NA	NA	NA	NA	49.639
576	42	-71.565	-13.074	2217	38.65	cloud forest	4818.01	251	2.2	2.3	1.4	Chloranthaceae	Hedyosmum	Hedyosmum_goudotianum	sapling	NA	NA	NA	NA	NA	NA	NA	NA	66.025
577	42	-71.565	-13.074	2217	38.65	cloud forest	4818.01	252	3	3.7	1.5	Rubiaceae	Palicourea	Palicourea_lineata	sapling	-0.804	4.02	-0.28	89.249	14.36	0.057	0.052	NA	41.778
578	42	-71.565	-13.074	2217	38.65	cloud forest	4818.01	253	4	5	3.6	Monimiaceae	Mollinedia	Mollinedia_ovata	shrub	-0.764	4.022	-0.322	95.902	83.205	0.01	0.021	NA	34.438
579	42	-71.565	-13.074	2217	38.65	cloud forest	4818.01	254	4	3.9	2.4	Melastomataceae	Miconia	Miconia_sp33	shrub	-0.792	3.078	-0.552	97.435	47.088	0.017	0.049	NA	47.887
580	42	-71.565	-13.074	2217	38.65	cloud forest	4818.01	255	4.5	3.5	3.1	Rosaceae	Prunus	Prunus_pleiantha	sapling	NA	NA	NA	NA	NA	NA	NA	NA	23.98
581	42	-71.565	-13.074	2217	38.65	cloud forest	4818.01	256	2.3	1.3	1	Sapindaceae	NA	Sapindaceae_42_256	sapling	NA	NA	NA	NA	NA	NA	NA	NA	NA
582	42	-71.565	-13.074	2217	38.65	cloud forest	4818.01	257	3.2	1.5	1	Melastomataceae	Miconia	Miconia_sp26	shrub	-1.332	2.706	-0.938	91.791	48.707	0.051	0.192	NA	56.944
583	42	-71.565	-13.074	2217	38.65	cloud forest	4818.01	258	2.5	1.6	1.1	Melastomataceae	Miconia	Miconia_sp43	shrub	-1.718	3.769	-0.865	48.483	7.815	0.096	0.426	NA	37.08
584	42	-71.565	-13.074	2217	38.65	cloud forest	4818.01	259	1.7	1.1	0.6	Melastomataceae	Miconia	Miconia_sp33	shrub	NA	NA	NA	NA	NA	NA	NA	NA	43.119
585	43	-71.565	-13.075	2121	36.25	cloud forest	4911.01	260	1.6	1.1	0.5	Chloranthaceae	Hedyosmum	Hedyosmum_goudotianum	sapling	NA	NA	NA	NA	NA	NA	NA	NA	72.019
586	43	-71.565	-13.075	2121	36.25	cloud forest	4911.01	261	1.3	1.3	0.6	Rubiaceae	Palicourea	Palicourea_lineata	sapling	NA	NA	NA	NA	NA	NA	NA	NA	44.918
587	43	-71.565	-13.075	2121	36.25	cloud forest	4911.01	262	3.5	2.7	2	Aquifoliaceae	Ilex	Ilex_guayusa	sapling	NA	NA	NA	NA	NA	NA	NA	NA	40.302
588	43	-71.565	-13.075	2121	36.25	cloud forest	4911.01	263	2.3	2.3	1.4	Chloranthaceae	Hedyosmum	Hedyosmum_racemosum	sapling	NA	NA	NA	NA	NA	NA	NA	NA	64.582
589	43	-71.565	-13.075	2121	36.25	cloud forest	4911.01	264	1.5	1	0.7	Chloranthaceae	Hedyosmum	Hedyosmum_cuatrecazanum	sapling	NA	NA	NA	NA	NA	NA	NA	NA	68.29
590	43	-71.565	-13.075	2121	36.25	cloud forest	4911.01	265	2.4	3.1	1.6	Chloranthaceae	Hedyosmum	Hedyosmum_cuatrecazanum	sapling	NA	NA	NA	NA	NA	NA	NA	NA	70.117
591	43	-71.565	-13.075	2121	36.25	cloud forest	4911.01	266	2.7	1.4	0.9	Melastomataceae	Miconia	Miconia_sp33	shrub	NA	NA	NA	NA	NA	NA	NA	NA	45.387
592	43	-71.565	-13.075	2121	36.25	cloud forest	4911.01	267	3.5	2.9	2.4	Clusiaceae	Clusia	Clusia_sp1	sapling	NA	NA	NA	NA	NA	NA	NA	NA	40.153
593	43	-71.565	-13.075	2121	36.25	cloud forest	4911.01	268	2	3.2	0.8	Chloranthaceae	Hedyosmum	Hedyosmum_racemosum	sapling	NA	NA	NA	NA	NA	NA	NA	NA	57.692
594	43	-71.565	-13.075	2121	36.25	cloud forest	4911.01	269	2.4	2.6	1.5	Chloranthaceae	Hedyosmum	Hedyosmum_cuatrecazanum	sapling	NA	NA	NA	NA	NA	NA	NA	NA	52.965
595	43	-71.565	-13.075	2121	36.25	cloud forest	4911.01	270	1.8	1.5	0.9	Chloranthaceae	Hedyosmum	Hedyosmum_racemosum	sapling	NA	NA	NA	NA	NA	NA	NA	NA	54.711
596	44	-71.565	-13.074	2217	38.65	cloud forest	4818.01	271	2.4	1.6	0.9	Phyllanthaceae	Hieronyma	Hieronyma_fendleri	sapling	NA	NA	NA	NA	NA	NA	NA	NA	86.134
597	44	-71.565	-13.074	2217	38.65	cloud forest	4818.01	272	2.5	2.2	1.3	Rubiaceae	Psychotria	Psychotria_sp10	shrub	NA	NA	NA	NA	NA	NA	NA	NA	51.388
598	44	-71.565	-13.074	2217	38.65	cloud forest	4818.01	273	3.2	2.2	1.5	Melastomataceae	Miconia	Miconia_sp28	shrub	NA	NA	NA	NA	NA	NA	NA	NA	63.168
599	44	-71.565	-13.074	2217	38.65	cloud forest	4818.01	274	3.5	3.7	2.6	Melastomataceae	Miconia	Miconia_sp29	shrub	NA	NA	NA	NA	NA	NA	NA	NA	40.792
600	44	-71.565	-13.074	2217	38.65	cloud forest	4818.01	275	2.8	2.7	2	Rubiaceae	Palicourea	Palicourea_lineata	sapling	NA	NA	NA	NA	NA	NA	NA	NA	56.944
601	44	-71.565	-13.074	2217	38.65	cloud forest	4818.01	276	1.6	1.4	0.6	Melastomataceae	Miconia	Miconia_sp33	shrub	NA	NA	NA	NA	NA	NA	NA	NA	56.623
602	44	-71.565	-13.074	2217	38.65	cloud forest	4818.01	277	2.6	2.1	1.3	Melastomataceae	Miconia	Miconia_sp10	shrub	NA	NA	NA	NA	NA	NA	NA	NA	55.108
603	44	-71.565	-13.074	2217	38.65	cloud forest	4818.01	278	2.4	1.8	1	Melastomataceae	Miconia	Miconia_sp28	shrub	NA	NA	NA	NA	NA	NA	NA	NA	62.035
604	44	-71.565	-13.074	2217	38.65	cloud forest	4818.01	279	3.4	3.3	2.2	Melastomataceae	Miconia	Miconia_sp37	shrub	NA	NA	NA	NA	NA	NA	NA	NA	70.501
605	44	-71.565	-13.074	2217	38.65	cloud forest	4818.01	280	4.5	2.9	2.4	Chloranthaceae	Hedyosmum	Hedyosmum_cuatrecazanum	sapling	NA	NA	NA	NA	NA	NA	NA	NA	66.397
606	44	-71.565	-13.074	2217	38.65	cloud forest	4818.01	281	2.5	3.5	0.8	Rubiaceae	Psychotria	Psychotria_sp6	shrub	NA	NA	NA	NA	NA	NA	NA	NA	50.609
607	44	-71.565	-13.074	2217	38.65	cloud forest	4818.01	282	4	3.5	2	Rubiaceae	Psychotria	Psychotria_sp6	shrub	NA	NA	NA	NA	NA	NA	NA	NA	44.929
608	44	-71.565	-13.074	2217	38.65	cloud forest	4818.01	283	2	2.2	1	Melastomataceae	Miconia	Miconia_sp20	shrub	NA	NA	NA	NA	NA	NA	NA	NA	26.918
609	45	-71.564	-13.073	2130	39.57	cloud forest	4901.68	284	1.5	1.1	0.6	Lauraceae	Persea	Persea_mutisii	sapling	-1.035	2.559	-0.371	73.994	21.675	0.037	0.113	NA	39.826
610	45	-71.564	-13.073	2130	39.57	cloud forest	4901.68	285	1.4	1	0.7	Chloranthaceae	Hedyosmum	Hedyosmum_goudotianum	sapling	-0.711	3.957	-0.291	91.406	6.277	0.076	0.059	NA	70.654
611	45	-71.564	-13.073	2130	39.57	cloud forest	4901.68	286	2.5	1.6	1.8	Clethraceae	Clethra	Clethra_revoluta	sapling	NA	NA	NA	NA	NA	NA	NA	NA	56.288
612	45	-71.564	-13.073	2130	39.57	cloud forest	4901.68	287	4	3	2.4	Myrtaceae	Myrcia	Myrcia_fallax	sapling	-1.472	2.655	-0.575	52.121	15.435	0.052	0.191	NA	46.481
613	45	-71.564	-13.073	2130	39.57	cloud forest	4901.68	288	3.2	2.3	1.6	Melastomataceae	Miconia	Miconia_sp20	shrub	-0.759	1.79	-0.306	90.332	19.92	0.035	0.066	NA	30.003
614	45	-71.564	-13.073	2130	39.57	cloud forest	4901.68	289	2.5	1.6	1.1	Araliaceae	Schefflera	Schefflera_sp1	sapling	-0.832	2.267	-0.304	91.521	24.347	0.027	0.049	NA	43.16
615	45	-71.564	-13.073	2130	39.57	cloud forest	4901.68	290	4	3.7	2.4	Rubiaceae	Palicourea	Palicourea_lineata	sapling	-0.927	3.376	-0.495	82.222	6.188	0.099	0.237	NA	61.607
616	45	-71.564	-13.073	2130	39.57	cloud forest	4901.68	291	1.7	1.1	0.8	Melastomataceae	Miconia	Miconia_sp24	shrub	NA	NA	NA	NA	NA	NA	NA	NA	50.04
617	45	-71.564	-13.073	2130	39.57	cloud forest	4901.68	292	3.2	2.3	1.8	Melastomataceae	Miconia	Miconia_sp20	shrub	-0.396	1.754	-0.158	96.599	44.549	0.017	0.043	NA	44.854
618	46	-71.536	-13.044	1474	41.01	sub montane forest	5787.46	293	2.6	2.7	1.6	Rubiaceae	Faramea	Faramea_sp1	sapling	NA	NA	NA	NA	NA	NA	NA	NA	NA
619	46	-71.536	-13.044	1474	41.01	sub montane forest	5787.46	294	3.1	2.7	1.4	Rubiaceae	Faramea	Faramea_sp1	sapling	NA	NA	NA	NA	NA	NA	NA	NA	NA
620	46	-71.536	-13.044	1474	41.01	sub montane forest	5787.46	295	2.2	1.9	1.1	Rubiaceae	Faramea	Faramea_sp1	sapling	NA	NA	NA	NA	NA	NA	NA	NA	NA
621	46	-71.536	-13.044	1474	41.01	sub montane forest	5787.46	296	1.5	1	0.4	Rubiaceae	Palicourea	Palicourea_46_296	shrub	NA	NA	NA	NA	NA	NA	NA	NA	77.456
622	46	-71.536	-13.044	1474	41.01	sub montane forest	5787.46	297	2	1.3	0.8	Rubiaceae	NA	Rubiaceae_46_297	sapling	NA	NA	NA	NA	NA	NA	NA	NA	NA
623	46	-71.536	-13.044	1474	41.01	sub montane forest	5787.46	298	1.5	1.2	0.5	Acanthaceae	Aphelandra	Aphelandra_sp2	shrub	NA	NA	NA	NA	NA	NA	NA	NA	76.659
624	46	-71.536	-13.044	1474	41.01	sub montane forest	5787.46	299	2.3	1.6	0.8	Rubiaceae	Faramea	Faramea_sp1	sapling	NA	NA	NA	NA	NA	NA	NA	NA	NA
625	46	-71.536	-13.044	1474	41.01	sub montane forest	5787.46	300	3.3	1.8	1.3	Rubiaceae	Faramea	Faramea_sp1	sapling	NA	NA	NA	NA	NA	NA	NA	NA	NA
626	46	-71.536	-13.044	1474	41.01	sub montane forest	5787.46	301	1.1	1.3	NA	Annonaceae	Anaxagorea	Anaxagorea_sp1	sapling	NA	NA	NA	NA	NA	NA	NA	NA	69.182
627	46	-71.536	-13.044	1474	41.01	sub montane forest	5787.46	302	1.9	1.5	0.9	Rubiaceae	NA	Rubiaceae_46_302	sapling	NA	NA	NA	NA	NA	NA	NA	NA	59.121
628	46	-71.536	-13.044	1474	41.01	sub montane forest	5787.46	303	4.5	3.4	2.6	Sapindaceae	Matayba	Matayba_sp1	sapling	NA	NA	NA	NA	NA	NA	NA	NA	69.073
629	46	-71.536	-13.044	1474	41.01	sub montane forest	5787.46	304	1.6	1.7	0.5	Rubiaceae	Faramea	Faramea_sp1	sapling	NA	NA	NA	NA	NA	NA	NA	NA	NA
630	46	-71.536	-13.044	1474	41.01	sub montane forest	5787.46	305	1.6	1.1	0.7	Lauraceae	Pleurothyrium	Pleurothyrium_sp1	sapling	NA	NA	NA	NA	NA	NA	NA	NA	44.412
631	46	-71.536	-13.044	1474	41.01	sub montane forest	5787.46	306	3.2	2.3	1.8	Rubiaceae	Faramea	Faramea_sp1	sapling	NA	NA	NA	NA	NA	NA	NA	NA	64.486
632	46	-71.536	-13.044	1474	41.01	sub montane forest	5787.46	307	2.8	2	1.4	Rubiaceae	Faramea	Faramea_sp1	sapling	NA	NA	NA	NA	NA	NA	NA	NA	72.129
633	47	-71.537	-13.043	1514	29.12	sub montane forest	5736.13	308	1.6	1.6	0.7	Ebenaceae	Lissocarpa	Lissocarpa_sp1	sapling	NA	NA	NA	NA	NA	NA	NA	NA	67.252
634	47	-71.537	-13.043	1514	29.12	sub montane forest	5736.13	309	1	2.1	NA	Annonaceae	NA	Annonaceae_47_309	sapling	NA	NA	NA	NA	NA	NA	NA	NA	79.017
635	47	-71.537	-13.043	1514	29.12	sub montane forest	5736.13	310	1.4	1	0.5	Melastomataceae	Miconia	Miconia_sp8	shrub	NA	NA	NA	NA	NA	NA	NA	NA	65.123
636	47	-71.537	-13.043	1514	29.12	sub montane forest	5736.13	311	1.6	1.1	0.6	Melastomataceae	Miconia	Miconia_sp8	shrub	NA	NA	NA	NA	NA	NA	NA	NA	NA
637	47	-71.537	-13.043	1514	29.12	sub montane forest	5736.13	312	3.2	3.5	2.3	Rubiaceae	Palicourea	Palicourea_sp1	sapling	NA	NA	NA	NA	NA	NA	NA	NA	68.678
638	47	-71.537	-13.043	1514	29.12	sub montane forest	5736.13	313	2.2	2.4	1.5	Clusiaceae	Chrysochlamys	Chrysochlamys_ulei	sapling	NA	NA	NA	NA	NA	NA	NA	NA	72.465
639	47	-71.537	-13.043	1514	29.12	sub montane forest	5736.13	314	2.3	2	1	Melastomataceae	Miconia	Miconia_sp8	shrub	NA	NA	NA	NA	NA	NA	NA	NA	NA
640	47	-71.537	-13.043	1514	29.12	sub montane forest	5736.13	315	1.4	1.3	0.6	Clusiaceae	Garcinia	Garcinia_macrophylla	sapling	NA	NA	NA	NA	NA	NA	NA	NA	55.235
641	47	-71.537	-13.043	1514	29.12	sub montane forest	5736.13	316	4.7	4.1	2.6	Moraceae	Perebea	Perebea_guianensis	sapling	NA	NA	NA	NA	NA	NA	NA	NA	66.634
642	47	-71.537	-13.043	1514	29.12	sub montane forest	5736.13	317	1.4	1.3	0.8	Clusiaceae	Garcinia	Garcinia_macrophylla	sapling	NA	NA	NA	NA	NA	NA	NA	NA	NA
643	47	-71.537	-13.043	1514	29.12	sub montane forest	5736.13	318	3	2.1	1.5	Melastomataceae	Miconia	Miconia_sp8	shrub	NA	NA	NA	NA	NA	NA	NA	NA	NA
644	47	-71.537	-13.043	1514	29.12	sub montane forest	5736.13	319	1.5	1.2	0.8	Ebenaceae	Lissocarpa	Lissocarpa_sp1	sapling	NA	NA	NA	NA	NA	NA	NA	NA	51.492
645	47	-71.537	-13.043	1514	29.12	sub montane forest	5736.13	320	2.5	2.9	1.4	Acanthaceae	Aphelandra	Aphelandra_sp1	shrub	NA	NA	NA	NA	NA	NA	NA	NA	91.69
646	47	-71.537	-13.043	1514	29.12	sub montane forest	5736.13	321	2.3	1.7	1.1	NA	NA	morphospecie_47_321	sapling	NA	NA	NA	NA	NA	NA	NA	NA	NA
647	47	-71.537	-13.043	1514	29.12	sub montane forest	5736.13	322	2.3	1.9	1.2	Clusiaceae	Garcinia	Garcinia_macrophylla	sapling	NA	NA	NA	NA	NA	NA	NA	NA	NA
648	47	-71.537	-13.043	1514	29.12	sub montane forest	5736.13	323	2.5	2.1	1.1	NA	NA	morphospecie_47_323	sapling	NA	NA	NA	NA	NA	NA	NA	NA	NA
649	47	-71.537	-13.043	1514	29.12	sub montane forest	5736.13	324	1.7	1.3	1	Clusiaceae	Garcinia	Garcinia_macrophylla	sapling	NA	NA	NA	NA	NA	NA	NA	NA	NA
650	47	-71.537	-13.043	1514	29.12	sub montane forest	5736.13	325	1.7	1.6	0.7	Melastomataceae	Miconia	Miconia_sp8	shrub	NA	NA	NA	NA	NA	NA	NA	NA	NA
651	47	-71.537	-13.043	1514	29.12	sub montane forest	5736.13	326	1.6	1.4	0.5	Melastomataceae	Miconia	Miconia_sp8	shrub	NA	NA	NA	NA	NA	NA	NA	NA	NA
652	47	-71.537	-13.043	1514	29.12	sub montane forest	5736.13	327	1.4	1.6	0.5	Clusiaceae	Garcinia	Garcinia_macrophylla	sapling	NA	NA	NA	NA	NA	NA	NA	NA	55.663
653	47	-71.537	-13.043	1514	29.12	sub montane forest	5736.13	328	0.8	1.1	NA	Lauraceae	Nectandra	Nectandra_sp1	sapling	NA	NA	NA	NA	NA	NA	NA	NA	69.815
654	47	-71.537	-13.043	1514	29.12	sub montane forest	5736.13	329	1.7	1.4	0.7	Melastomataceae	Miconia	Miconia_sp8	shrub	NA	NA	NA	NA	NA	NA	NA	NA	43.642
655	47	-71.537	-13.043	1514	29.12	sub montane forest	5736.13	330	2.6	1.9	1.6	Siparunaceae	Siparuna	Siparuna_aspera	sapling	NA	NA	NA	NA	NA	NA	NA	NA	82.325
656	47	-71.537	-13.043	1514	29.12	sub montane forest	5736.13	331	2.7	1.4	1.5	Sapotaceae	Pouteria	Pouteria_torta	sapling	NA	NA	NA	NA	NA	NA	NA	NA	64.412
657	48	-71.543	-13.042	1772	25.51	sub montane forest	5361.96	332	1.8	2.1	0.8	Chloranthaceae	Hedyosmum	Hedyosmum_racemosum	sapling	NA	NA	NA	NA	NA	NA	NA	NA	91.634
658	48	-71.543	-13.042	1772	25.51	sub montane forest	5361.96	333	1.5	1.7	0.8	Acanthaceae	Aphelandra	Aphelandra_sp1	shrub	NA	NA	NA	NA	NA	NA	NA	NA	89.162
659	48	-71.543	-13.042	1772	25.51	sub montane forest	5361.96	334	1.6	1	0.5	Melastomataceae	Miconia	Miconia_sp7	shrub	NA	NA	NA	NA	NA	NA	NA	NA	55.923
660	48	-71.543	-13.042	1772	25.51	sub montane forest	5361.96	335	2.1	1.6	1.1	Anacardiaceae	Tapirira	Tapirira_guianensis	sapling	NA	NA	NA	NA	NA	NA	NA	NA	63.122
661	48	-71.543	-13.042	1772	25.51	sub montane forest	5361.96	336	3.3	3.3	2.3	Lauraceae	Ocotea	Ocotea_cernua	sapling	NA	NA	NA	NA	NA	NA	NA	NA	51.676
662	48	-71.543	-13.042	1772	25.51	sub montane forest	5361.96	337	2.1	1.1	0.9	Araliaceae	NA	Araliaceae_48_337	sapling	NA	NA	NA	NA	NA	NA	NA	NA	NA
663	48	-71.543	-13.042	1772	25.51	sub montane forest	5361.96	338	1.4	2	0.3	Rubiaceae	Palicourea	Palicourea_lineata	sapling	NA	NA	NA	NA	NA	NA	NA	NA	80.158
664	48	-71.543	-13.042	1772	25.51	sub montane forest	5361.96	339	1.5	1	0.4	Melastomataceae	Miconia	Miconia_sp9	shrub	NA	NA	NA	NA	NA	NA	NA	NA	57.513
665	48	-71.543	-13.042	1772	25.51	sub montane forest	5361.96	340	1.5	1	0.6	Melastomataceae	Miconia	Miconia_sp14	shrub	NA	NA	NA	NA	NA	NA	NA	NA	67.995
666	48	-71.543	-13.042	1772	25.51	sub montane forest	5361.96	341	2.8	2.1	1.6	Monimiaceae	Mollinedia	Mollinedia_sp1	shrub	NA	NA	NA	NA	NA	NA	NA	NA	60.515
667	48	-71.543	-13.042	1772	25.51	sub montane forest	5361.96	342	2.7	2.2	1.7	Piperaceae	Piper	Piper_sp6	shrub	NA	NA	NA	NA	NA	NA	NA	NA	82.72
668	48	-71.543	-13.042	1772	25.51	sub montane forest	5361.96	343	4.5	2.7	2.4	Piperaceae	Piper	Piper_sp6	shrub	NA	NA	NA	NA	NA	NA	NA	NA	NA
669	48	-71.543	-13.042	1772	25.51	sub montane forest	5361.96	344	1.5	1.4	0.5	Piperaceae	Piper	Piper_sp6	shrub	NA	NA	NA	NA	NA	NA	NA	NA	NA
670	48	-71.543	-13.042	1772	25.51	sub montane forest	5361.96	345	1.9	1.5	0.7	Melastomataceae	Miconia	Miconia_sp26	shrub	NA	NA	NA	NA	NA	NA	NA	NA	59.928
671	48	-71.543	-13.042	1772	25.51	sub montane forest	5361.96	346	1.2	1.2	NA	Primulaceae	Cybianthus	Cybianthus_sp2	shrub	NA	NA	NA	NA	NA	NA	NA	NA	NA
672	48	-71.543	-13.042	1772	25.51	sub montane forest	5361.96	347	1.5	1.6	0.5	Gesneriaceae	Besleria	Besleria_sp1	shrub	NA	NA	NA	NA	NA	NA	NA	NA	84.526
673	48	-71.543	-13.042	1772	25.51	sub montane forest	5361.96	348	2.1	2.3	1.4	Phyllanthaceae	Hieronyma	Hieronyma_fendleri	sapling	NA	NA	NA	NA	NA	NA	NA	NA	52.124
674	48	-71.543	-13.042	1772	25.51	sub montane forest	5361.96	349	2.7	2.9	1.3	Moraceae	Pseudolmedia	Pseudolmedia_macrophylla	sapling	NA	NA	NA	NA	NA	NA	NA	NA	65.408
675	48	-71.543	-13.042	1772	25.51	sub montane forest	5361.96	350	1.8	1.7	0.7	Rubiaceae	Palicourea	Palicourea_lineata	sapling	NA	NA	NA	NA	NA	NA	NA	NA	79.326
676	49	-71.541	-13.042	1732	32.97	sub montane forest	5421.29	351	1.6	1.1	0.6	Anacardiaceae	Tapirira	Tapirira_guianensis	sapling	NA	NA	NA	NA	NA	NA	NA	NA	69.082
677	49	-71.541	-13.042	1732	32.97	sub montane forest	5421.29	352	2.1	1.3	0.9	Rubiaceae	Palicourea	Palicourea_lineata	sapling	NA	NA	NA	NA	NA	NA	NA	NA	NA
678	49	-71.541	-13.042	1732	32.97	sub montane forest	5421.29	353	2.3	1.1	0.8	Rubiaceae	Palicourea	Palicourea_lineata	sapling	NA	NA	NA	NA	NA	NA	NA	NA	NA
679	49	-71.541	-13.042	1732	32.97	sub montane forest	5421.29	354	2.3	2.4	0.9	Rubiaceae	Faramea	Faramea_sp1	sapling	NA	NA	NA	NA	NA	NA	NA	NA	NA
680	49	-71.541	-13.042	1732	32.97	sub montane forest	5421.29	355	1.3	1.1	NA	Anacardiaceae	Tapirira	Tapirira_guianensis	sapling	NA	NA	NA	NA	NA	NA	NA	NA	68.392
681	49	-71.541	-13.042	1732	32.97	sub montane forest	5421.29	356	1.2	1.3	NA	Anacardiaceae	Tapirira	Tapirira_guianensis	sapling	NA	NA	NA	NA	NA	NA	NA	NA	83.401
682	49	-71.541	-13.042	1732	32.97	sub montane forest	5421.29	357	3.4	2.9	2.2	Rubiaceae	Palicourea	Palicourea_lineata	sapling	NA	NA	NA	NA	NA	NA	NA	NA	79.232
683	49	-71.541	-13.042	1732	32.97	sub montane forest	5421.29	358	2.2	1.6	1	Melastomataceae	Miconia	Miconia_sp37	shrub	NA	NA	NA	NA	NA	NA	NA	NA	85.07
684	49	-71.541	-13.042	1732	32.97	sub montane forest	5421.29	359	1.9	1.3	0.6	Rubiaceae	Palicourea	Palicourea_lineata	sapling	NA	NA	NA	NA	NA	NA	NA	NA	NA
685	49	-71.541	-13.042	1732	32.97	sub montane forest	5421.29	360	2.8	2.8	1.9	Euphorbiaceae	Croton	Croton_sp1	sapling	NA	NA	NA	NA	NA	NA	NA	NA	89.105
686	49	-71.541	-13.042	1732	32.97	sub montane forest	5421.29	361	2	1.5	0.9	Rubiaceae	Palicourea	Palicourea_lineata	sapling	NA	NA	NA	NA	NA	NA	NA	NA	NA
687	49	-71.541	-13.042	1732	32.97	sub montane forest	5421.29	362	2.8	2.8	1.7	Sapindaceae	Talisia	Talisia_cerasina	sapling	NA	NA	NA	NA	NA	NA	NA	NA	37.262
688	49	-71.541	-13.042	1732	32.97	sub montane forest	5421.29	363	2.5	2.7	1	Euphorbiaceae	Alchornea	Alchornea_sp1	sapling	NA	NA	NA	NA	NA	NA	NA	NA	55.156
689	49	-71.541	-13.042	1732	32.97	sub montane forest	5421.29	364	4.5	4.2	3	Rubiaceae	Faramea	Faramea_sp1	sapling	NA	NA	NA	NA	NA	NA	NA	NA	69.306
690	49	-71.541	-13.042	1732	32.97	sub montane forest	5421.29	365	1.7	1.1	0.6	NA	NA	morphospecie_49_365	sapling	NA	NA	NA	NA	NA	NA	NA	NA	NA
691	49	-71.541	-13.042	1732	32.97	sub montane forest	5421.29	366	1.7	2	0.7	Lauraceae	Persea	Persea_nudigemma	sapling	NA	NA	NA	NA	NA	NA	NA	NA	NA
692	49	-71.541	-13.042	1732	32.97	sub montane forest	5421.29	367	2	1.2	0.9	Primulaceae	Cybianthus	Cybianthus_sp1	shrub	NA	NA	NA	NA	NA	NA	NA	NA	46.656
693	49	-71.541	-13.042	1732	32.97	sub montane forest	5421.29	368	4	2.4	1.6	Lauraceae	Persea	Persea_nudigemma	sapling	NA	NA	NA	NA	NA	NA	NA	NA	59.64
694	49	-71.541	-13.042	1732	32.97	sub montane forest	5421.29	369	4.5	3.7	2.5	Lauraceae	Ocotea	Ocotea_cernua	sapling	NA	NA	NA	NA	NA	NA	NA	NA	60.803
695	49	-71.541	-13.042	1732	32.97	sub montane forest	5421.29	370	2.4	1.8	1.6	Sapindaceae	Paullinia	Paullinia_sp1	sapling	NA	NA	NA	NA	NA	NA	NA	NA	65.227
696	50	-71.565	-12.954	937	3.56	sub montane forest	5724.99	371	0.9	1.6	NA	Piperaceae	Piper	Piper_sp5	shrub	NA	NA	NA	NA	NA	NA	NA	NA	87.65
697	50	-71.565	-12.954	937	3.56	sub montane forest	5724.99	372	1.9	2.2	1.4	Moraceae	Perebea	Perebea_guianensis	sapling	NA	NA	NA	NA	NA	NA	NA	NA	75.118
698	50	-71.565	-12.954	937	3.56	sub montane forest	5724.99	373	2.5	2.5	1	Fabaceae	Dussia	Dussia_sp1	sapling	NA	NA	NA	NA	NA	NA	NA	NA	75.04
699	50	-71.565	-12.954	937	3.56	sub montane forest	5724.99	374	1.1	1.4	NA	Chloranthaceae	Hedyosmum	Hedyosmum_anisodorum	sapling	-0.779	6.506	-0.29	93.542	23.136	0.026	0.032	NA	NA
700	50	-71.565	-12.954	937	3.56	sub montane forest	5724.99	375	0.8	1.4	NA	Chloranthaceae	Hedyosmum	Hedyosmum_anisodorum	sapling	NA	NA	NA	NA	NA	NA	NA	NA	85.078
701	50	-71.565	-12.954	937	3.56	sub montane forest	5724.99	376	1.2	1.5	NA	Chloranthaceae	Hedyosmum	Hedyosmum_anisodorum	sapling	NA	NA	NA	NA	NA	NA	NA	NA	85.292
702	50	-71.565	-12.954	937	3.56	sub montane forest	5724.99	377	2.5	2.1	1.3	Myrtaceae	Myrcia	Myrcia_rostrata	sapling	-1.669	4.126	-0.419	45.23	12.423	0.065	0.099	NA	81.43
703	50	-71.565	-12.954	937	3.56	sub montane forest	5724.99	378	1.2	1.5	NA	Gesneriaceae	Besleria	Besleria_sp1	shrub	NA	NA	NA	NA	NA	NA	NA	NA	NA
704	50	-71.565	-12.954	937	3.56	sub montane forest	5724.99	379	1.9	2.5	0.8	Elaeocarpaceae	Sloanea	Sloanea_terniflora	sapling	NA	NA	NA	NA	NA	NA	NA	NA	66.774
705	50	-71.565	-12.954	937	3.56	sub montane forest	5724.99	380	0.6	1.2	NA	Gesneriaceae	Besleria	Besleria_sp1	shrub	NA	NA	NA	NA	NA	NA	NA	NA	86.818
706	50	-71.565	-12.954	937	3.56	sub montane forest	5724.99	381	2.8	4.5	3	Meliaceae	Guarea	Guarea_kunthiana	sapling	NA	NA	NA	NA	NA	NA	NA	NA	86.241
707	50	-71.565	-12.954	937	3.56	sub montane forest	5724.99	382	1.9	1.5	0.9	Fabaceae	Inga	Inga_sp5	sapling	NA	NA	NA	NA	NA	NA	NA	NA	NA
708	50	-71.565	-12.954	937	3.56	sub montane forest	5724.99	383	1	1.3	NA	NA	NA	morphospecie_50_383	sapling	-1.165	3.129	-0.074	41.764	7.234	0.055	0.023	NA	52.334
709	50	-71.565	-12.954	937	3.56	sub montane forest	5724.99	384	1.7	1	0.8	Piperaceae	Piper	Piper_sp6	shrub	NA	NA	NA	NA	NA	NA	NA	NA	93.028
710	50	-71.565	-12.954	937	3.56	sub montane forest	5724.99	385	2	2	1.1	Fabaceae	Dussia	Dussia_sp1	sapling	-1.093	3.088	-0.476	76.886	18.583	0.042	0.243	NA	51.404
711	50	-71.565	-12.954	937	3.56	sub montane forest	5724.99	386	1.7	1.5	0.4	Fabaceae	Inga	Inga_sp3	sapling	NA	NA	NA	NA	NA	NA	NA	NA	55.884
712	50	-71.565	-12.954	937	3.56	sub montane forest	5724.99	387	1.4	1.6	0.7	Clusiaceae	Chrysochlamys	Chrysochlamys_ulei	sapling	-0.715	6.92	-0.166	97.23	14.092	0.026	0.008	NA	80.607
713	50	-71.565	-12.954	937	3.56	sub montane forest	5724.99	388	2.2	1.5	1.8	Fabaceae	Inga	Inga_sp4	sapling	NA	NA	NA	NA	NA	NA	NA	NA	76.509
714	51	-71.566	-12.954	938	0.33	sub montane forest	5727.3	389	2.5	3.4	2.1	Lauraceae	Endlicheria	Endlicheria_sp1	sapling	NA	NA	NA	NA	NA	NA	NA	NA	79.451
715	51	-71.566	-12.954	938	0.33	sub montane forest	5727.3	390	1.4	1	0.2	Melastomataceae	Miconia	Miconia_sp3	shrub	NA	NA	NA	NA	NA	NA	NA	NA	91.113
716	51	-71.566	-12.954	938	0.33	sub montane forest	5727.3	391	1	1.2	NA	Rubiaceae	Palicourea	Palicourea_sp5	sapling	NA	NA	NA	NA	NA	NA	NA	NA	90.325
717	51	-71.566	-12.954	938	0.33	sub montane forest	5727.3	392	1.1	1	NA	Melastomataceae	Miconia	Miconia_sp43	shrub	NA	NA	NA	NA	NA	NA	NA	NA	65.666
718	51	-71.566	-12.954	938	0.33	sub montane forest	5727.3	393	3.8	3	2	Melastomataceae	Miconia	Miconia_sp44	shrub	NA	NA	NA	NA	NA	NA	NA	NA	70.908
719	51	-71.566	-12.954	938	0.33	sub montane forest	5727.3	394	0.7	1.4	NA	Clusiaceae	Chrysochlamys	Chrysochlamys_ulei	sapling	NA	NA	NA	NA	NA	NA	NA	NA	85.356
720	51	-71.566	-12.954	938	0.33	sub montane forest	5727.3	395	1.4	1.1	0.3	Sapindaceae	Paullinia	Paullinia_sp2	sapling	NA	NA	NA	NA	NA	NA	NA	NA	54.618
721	51	-71.566	-12.954	938	0.33	sub montane forest	5727.3	396	0.9	1	NA	Piperaceae	Piper	Piper_sp6	shrub	NA	NA	NA	NA	NA	NA	NA	NA	87.137
722	51	-71.566	-12.954	938	0.33	sub montane forest	5727.3	397	1.1	1	NA	Melastomataceae	Miconia	Miconia_sp43	shrub	NA	NA	NA	NA	NA	NA	NA	NA	76.316
723	51	-71.566	-12.954	938	0.33	sub montane forest	5727.3	398	1.6	1.3	0.5	Melastomataceae	Miconia	Miconia_sp38	shrub	NA	NA	NA	NA	NA	NA	NA	NA	68.917
724	52	-71.567	-12.954	946	4.71	sub montane forest	5745.41	399	2.1	1.5	1	Piperaceae	Piper	Piper_sp8	shrub	NA	NA	NA	NA	NA	NA	NA	NA	76.728
725	52	-71.567	-12.954	946	4.71	sub montane forest	5745.41	400	1	1.3	NA	Rubiaceae	Elaeagia	Elaeagia_sp3	sapling	NA	NA	NA	NA	NA	NA	NA	NA	NA
726	52	-71.567	-12.954	946	4.71	sub montane forest	5745.41	401	2.3	2.4	1.5	Araliaceae	NA	Araliaceae_52_401	sapling	-0.901	2.49	-0.48	84.105	7.171	0.117	0.228	NA	50.199
727	52	-71.567	-12.954	946	4.71	sub montane forest	5745.41	402	2	1.3	0.7	Myrtaceae	Eugenia	Eugenia_feijoi	sapling	NA	NA	NA	NA	NA	NA	NA	NA	64.578
728	52	-71.567	-12.954	946	4.71	sub montane forest	5745.41	403	4	4.8	3	Rubiaceae	Psychotria	Psychotria_sp2	shrub	-0.701	3.574	-0.2	86.852	3.673	0.109	0.059	NA	47.166
729	52	-71.567	-12.954	946	4.71	sub montane forest	5745.41	404	1.9	4.6	0.9	Melastomataceae	Miconia	Miconia_sp41	shrub	NA	NA	NA	NA	NA	NA	NA	NA	38.239
730	52	-71.567	-12.954	946	4.71	sub montane forest	5745.41	405	2.3	2.1	0.9	Malvaceae	Matisia	Matisia_malacocalyx	sapling	NA	NA	NA	NA	NA	NA	NA	NA	47.972
731	52	-71.567	-12.954	946	4.71	sub montane forest	5745.41	406	1.1	1.1	NA	Gesneriaceae	Besleria	Besleria_sp1	shrub	NA	NA	NA	NA	NA	NA	NA	NA	78.147
732	52	-71.567	-12.954	946	4.71	sub montane forest	5745.41	407	2.2	3.2	1.6	Rubiaceae	Palicourea	Palicourea_sp5	sapling	NA	NA	NA	NA	NA	NA	NA	NA	NA
733	52	-71.567	-12.954	946	4.71	sub montane forest	5745.41	408	1.5	2.2	0.9	Gesneriaceae	Besleria	Besleria_sp1	shrub	NA	NA	NA	NA	NA	NA	NA	NA	NA
734	52	-71.567	-12.954	946	4.71	sub montane forest	5745.41	409	1.4	1	0.5	Piperaceae	Piper	Piper_sp9	shrub	NA	NA	NA	NA	NA	NA	NA	NA	86.042
735	52	-71.567	-12.954	946	4.71	sub montane forest	5745.41	410	2.1	2.4	1.2	Piperaceae	Piper	Piper_sp9	shrub	NA	NA	NA	NA	NA	NA	NA	NA	68.719
736	52	-71.567	-12.954	946	4.71	sub montane forest	5745.41	411	1.6	1	0.5	Piperaceae	Piper	Piper_sp7	shrub	NA	NA	NA	NA	NA	NA	NA	NA	86.63
737	52	-71.567	-12.954	946	4.71	sub montane forest	5745.41	412	1	1.2	NA	Piperaceae	Piper	Piper_sp12	shrub	NA	NA	NA	NA	NA	NA	NA	NA	NA
738	52	-71.567	-12.954	946	4.71	sub montane forest	5745.41	413	1.8	1.2	0.7	Piperaceae	Piper	Piper_sp7	shrub	NA	NA	NA	NA	NA	NA	NA	NA	NA
739	52	-71.567	-12.954	946	4.71	sub montane forest	5745.41	414	3.2	2.6	1.9	Piperaceae	Piper	Piper_sp8	shrub	NA	NA	NA	NA	NA	NA	NA	NA	NA
740	52	-71.567	-12.954	946	4.71	sub montane forest	5745.41	415	1.1	1.9	NA	Gesneriaceae	Besleria	Besleria_sp1	shrub	NA	NA	NA	NA	NA	NA	NA	NA	64.475
741	52	-71.567	-12.954	946	4.71	sub montane forest	5745.41	416	1.6	1.7	1	Rubiaceae	Palicourea	Palicourea_sp5	sapling	NA	NA	NA	NA	NA	NA	NA	NA	74.76
742	52	-71.567	-12.954	946	4.71	sub montane forest	5745.41	417	4	4.6	2.4	Rubiaceae	Palicourea	Palicourea_sp5	sapling	NA	NA	NA	NA	NA	NA	NA	NA	75.697
743	52	-71.567	-12.954	946	4.71	sub montane forest	5745.41	418	3.8	4	2.2	Rubiaceae	Palicourea	Palicourea_sp5	sapling	-0.832	3.732	-0.39	82.142	18.941	0.044	0.154	NA	NA
744	52	-71.567	-12.954	946	4.71	sub montane forest	5745.41	419	1.8	2	0.7	Rubiaceae	NA	Rubiaceae_52_419	sapling	NA	NA	NA	NA	NA	NA	NA	NA	NA
745	52	-71.567	-12.954	946	4.71	sub montane forest	5745.41	420	3.7	2.3	1.5	Rubiaceae	Psychotria	Psychotria_sp4	shrub	-0.983	3.49	-0.15	71.737	17.062	0.055	0.032	NA	78.489
746	53	-71.567	-12.954	944	4.71	sub montane forest	5740.95	421	2.1	1.2	0.7	Urticaceae	Pourouma	Pourouma_cecropiifolia	sapling	NA	NA	NA	NA	NA	NA	NA	NA	NA
747	53	-71.567	-12.954	944	4.71	sub montane forest	5740.95	422	1.9	1.6	0.7	Euphorbiaceae	Alchornea	Alchornea_grandis	sapling	NA	NA	NA	NA	NA	NA	NA	NA	NA
748	53	-71.567	-12.954	944	4.71	sub montane forest	5740.95	423	3.1	2.3	1.1	Melastomataceae	Miconia	Miconia_sp42	shrub	NA	NA	NA	NA	NA	NA	NA	NA	49.942
749	53	-71.567	-12.954	944	4.71	sub montane forest	5740.95	424	4.2	3.5	1.8	Melastomataceae	Miconia	Miconia_sp42	shrub	NA	NA	NA	NA	NA	NA	NA	NA	NA
750	53	-71.567	-12.954	944	4.71	sub montane forest	5740.95	425	2.3	3	1.4	Myrtaceae	Eugenia	Eugenia_feijoi	sapling	NA	NA	NA	NA	NA	NA	NA	NA	43.621
751	53	-71.567	-12.954	944	4.71	sub montane forest	5740.95	426	1.8	2.5	1.4	Rubiaceae	Palicourea	Palicourea_sp5	sapling	NA	NA	NA	NA	NA	NA	NA	NA	NA
752	53	-71.567	-12.954	944	4.71	sub montane forest	5740.95	427	1.9	2.9	1.2	Rubiaceae	Palicourea	Palicourea_sp5	sapling	NA	NA	NA	NA	NA	NA	NA	NA	81.452
753	53	-71.567	-12.954	944	4.71	sub montane forest	5740.95	428	1.8	1.5	0.7	Melastomataceae	Miconia	Miconia_sp43	shrub	NA	NA	NA	NA	NA	NA	NA	NA	55.862
754	53	-71.567	-12.954	944	4.71	sub montane forest	5740.95	429	3.5	2.7	2	Myrtaceae	Myrcia	Myrcia_rostrata	sapling	NA	NA	NA	NA	NA	NA	NA	NA	61.205
755	53	-71.567	-12.954	944	4.71	sub montane forest	5740.95	430	1.5	1.5	0.7	Rubiaceae	Elaeagia	Elaeagia_sp3	sapling	NA	NA	NA	NA	NA	NA	NA	NA	74.007
756	53	-71.567	-12.954	944	4.71	sub montane forest	5740.95	431	2.3	1.9	0.7	Nyctaginaceae	Neea	Neea_divaricata	sapling	NA	NA	NA	NA	NA	NA	NA	NA	65.725
757	53	-71.567	-12.954	944	4.71	sub montane forest	5740.95	432	1.2	1	NA	Myrtaceae	Eugenia	Eugenia_feijoi	sapling	NA	NA	NA	NA	NA	NA	NA	NA	71.601
758	53	-71.567	-12.954	944	4.71	sub montane forest	5740.95	433	2.1	1.8	1.1	Melastomataceae	Miconia	Miconia_sp60	shrub	NA	NA	NA	NA	NA	NA	NA	NA	NA
759	53	-71.567	-12.954	944	4.71	sub montane forest	5740.95	434	1.8	1.5	1	Piperaceae	Piper	Piper_sp8	shrub	NA	NA	NA	NA	NA	NA	NA	NA	NA
760	53	-71.567	-12.954	944	4.71	sub montane forest	5740.95	435	1	1	NA	Melastomataceae	Miconia	Miconia_sp46	shrub	NA	NA	NA	NA	NA	NA	NA	NA	58.353
761	53	-71.567	-12.954	944	4.71	sub montane forest	5740.95	436	2.3	2.8	1.6	Melastomataceae	Miconia	Miconia_sp14	shrub	NA	NA	NA	NA	NA	NA	NA	NA	69.565
762	53	-71.567	-12.954	944	4.71	sub montane forest	5740.95	437	1.9	1.2	1	Piperaceae	Piper	Piper_sp8	shrub	NA	NA	NA	NA	NA	NA	NA	NA	NA
763	53	-71.567	-12.954	944	4.71	sub montane forest	5740.95	438	4.3	3.4	2.5	Melastomataceae	Miconia	Miconia_sp44	shrub	NA	NA	NA	NA	NA	NA	NA	NA	33.081
764	53	-71.567	-12.954	944	4.71	sub montane forest	5740.95	439	2.3	1.5	1	Melastomataceae	Miconia	Miconia_sp5	shrub	NA	NA	NA	NA	NA	NA	NA	NA	51.51
765	53	-71.567	-12.954	944	4.71	sub montane forest	5740.95	440	2.2	1.8	1.4	Lauraceae	Pleurothyrium	Pleurothyrium_cuneifolium	sapling	NA	NA	NA	NA	NA	NA	NA	NA	45.746
766	53	-71.567	-12.954	944	4.71	sub montane forest	5740.95	441	2	1.1	0.6	Melastomataceae	Miconia	Miconia_sp14	shrub	NA	NA	NA	NA	NA	NA	NA	NA	32.531
767	53	-71.567	-12.954	944	4.71	sub montane forest	5740.95	442	3.1	1.8	1.7	Melastomataceae	Miconia	Miconia_sp14	shrub	NA	NA	NA	NA	NA	NA	NA	NA	67.892
768	53	-71.567	-12.954	944	4.71	sub montane forest	5740.95	443	1.6	3.1	1.7	Rubiaceae	Psychotria	Psychotria_sp3	shrub	NA	NA	NA	NA	NA	NA	NA	NA	NA
769	54	-71.37	-11.9	400	5.68	lowland forest	2109.25	CC1	NA	NA	NA	NA	NA	morphospecie_54_CC1	sapling	NA	NA	NA	NA	NA	NA	NA	NA	50.147
770	54	-71.37	-11.9	400	5.68	lowland forest	2109.25	CC3	NA	NA	NA	NA	NA	morphospecie_54_CC3	sapling	NA	NA	NA	NA	NA	NA	NA	NA	55.006
771	54	-71.37	-11.9	400	5.68	lowland forest	2109.25	CC5	NA	NA	NA	NA	NA	morphospecie_54_CC5	sapling	NA	NA	NA	NA	NA	NA	NA	NA	25.214
772	54	-71.37	-11.9	400	5.68	lowland forest	2109.25	CC6	NA	NA	NA	NA	NA	morphospecie_54_CC6	sapling	NA	NA	NA	NA	NA	NA	NA	NA	39.667
773	54	-71.37	-11.9	400	5.68	lowland forest	2109.25	CC7a	NA	NA	NA	NA	NA	morphospecie_54_CC7a	sapling	NA	NA	NA	NA	NA	NA	NA	NA	NA
774	54	-71.37	-11.9	400	5.68	lowland forest	2109.25	CC7b	NA	NA	NA	NA	NA	morphospecie_54_CC7b	sapling	NA	NA	NA	NA	NA	NA	NA	NA	NA
775	54	-71.37	-11.9	400	5.68	lowland forest	2109.25	CC9	NA	NA	NA	NA	NA	morphospecie_54_CC9	sapling	NA	NA	NA	NA	NA	NA	NA	NA	75.592
776	54	-71.37	-11.9	400	5.68	lowland forest	2109.25	CC11	NA	NA	NA	NA	NA	morphospecie_54_CC11	sapling	NA	NA	NA	NA	NA	NA	NA	NA	56.11
777	54	-71.37	-11.9	400	5.68	lowland forest	2109.25	CC12	NA	NA	NA	NA	NA	morphospecie_54_CC12	sapling	NA	NA	NA	NA	NA	NA	NA	NA	54.063
778	55	-71.37	-11.9	400	5.68	lowland forest	2109.25	1	NA	NA	NA	Myrtaceae	Eugenia	Eugenia_sp1	sapling	NA	NA	NA	NA	NA	NA	NA	NA	47.683
779	55	-71.37	-11.9	400	5.68	lowland forest	2109.25	2	NA	NA	NA	Malvaceae	Theobroma	Theobroma_cacao	sapling	NA	NA	NA	NA	NA	NA	NA	NA	42.428
780	55	-71.37	-11.9	400	5.68	lowland forest	2109.25	3	NA	NA	NA	Annonaceae	Klarobelia	Klarobelia_candida	sapling	NA	NA	NA	NA	NA	NA	NA	NA	28.542
781	55	-71.37	-11.9	400	5.68	lowland forest	2109.25	4	NA	NA	NA	Annonaceae	Klarobelia	Klarobelia_candida	sapling	NA	NA	NA	NA	NA	NA	NA	NA	24.901
782	55	-71.37	-11.9	400	5.68	lowland forest	2109.25	5	NA	NA	NA	Ebenaceae	Diospyros	Diospyros_sp1	sapling	NA	NA	NA	NA	NA	NA	NA	NA	43.761
783	55	-71.37	-11.9	400	5.68	lowland forest	2109.25	6	NA	NA	NA	Capparaceae	Capparis	Capparis_sola	sapling	NA	NA	NA	NA	NA	NA	NA	NA	16.09
784	55	-71.37	-11.9	400	5.68	lowland forest	2109.25	7	NA	NA	NA	Rubiaceae	Ixora	Ixora_peruviana	sapling	NA	NA	NA	NA	NA	NA	NA	NA	50.422
785	55	-71.37	-11.9	400	5.68	lowland forest	2109.25	8	NA	NA	NA	Sapotaceae	Pouteria	Pouteria_ephedrantha	sapling	NA	NA	NA	NA	NA	NA	NA	NA	40.21
786	55	-71.37	-11.9	400	5.68	lowland forest	2109.25	9	NA	NA	NA	Salicaceae	Hasseltia	Hasseltia_floribunda	sapling	NA	NA	NA	NA	NA	NA	NA	NA	28.333
787	55	-71.37	-11.9	400	5.68	lowland forest	2109.25	10	NA	NA	NA	Salicaceae	Hasseltia	Hasseltia_floribunda	sapling	NA	NA	NA	NA	NA	NA	NA	NA	NA
788	55	-71.37	-11.9	400	5.68	lowland forest	2109.25	11	NA	NA	NA	Malvaceae	Theobroma	Theobroma_cacao	sapling	NA	NA	NA	NA	NA	NA	NA	NA	NA
789	55	-71.37	-11.9	400	5.68	lowland forest	2109.25	12	NA	NA	NA	Malvaceae	Theobroma	Theobroma_cacao	sapling	NA	NA	NA	NA	NA	NA	NA	NA	NA
790	55	-71.37	-11.9	400	5.68	lowland forest	2109.25	13	NA	NA	NA	Myrtaceae	Eugenia	Eugenia_sp1	sapling	NA	NA	NA	NA	NA	NA	NA	NA	60.207
791	55	-71.37	-11.9	400	5.68	lowland forest	2109.25	14	NA	NA	NA	Meliaceae	Guarea	Guarea_kunthiana	sapling	NA	NA	NA	NA	NA	NA	NA	NA	43.577
792	55	-71.37	-11.9	400	5.68	lowland forest	2109.25	15	NA	NA	NA	Combretaceae	Buchenavia	Buchenavia_grandis	sapling	NA	NA	NA	NA	NA	NA	NA	NA	48.284
793	55	-71.37	-11.9	400	5.68	lowland forest	2109.25	16	NA	NA	NA	Fabaceae	Lecointea	Lecointea_amazonica	sapling	NA	NA	NA	NA	NA	NA	NA	NA	27.451
794	56	-71.37	-11.9	400	5.68	lowland forest	2109.25	359.1	NA	NA	NA	NA	NA	morphospecie_56_359.1	sapling	NA	NA	NA	NA	NA	NA	NA	NA	56.006
795	56	-71.37	-11.9	400	5.68	lowland forest	2109.25	4980	NA	NA	NA	NA	NA	morphospecie_56_4980	sapling	NA	NA	NA	NA	NA	NA	NA	NA	44.085
796	56	-71.37	-11.9	400	5.68	lowland forest	2109.25	224.1	NA	NA	NA	NA	NA	morphospecie_56_224.1	sapling	NA	NA	NA	NA	NA	NA	NA	NA	41.44
797	56	-71.37	-11.9	400	5.68	lowland forest	2109.25	356.1	NA	NA	NA	NA	NA	morphospecie_56_356.1	sapling	NA	NA	NA	NA	NA	NA	NA	NA	37.263
798	56	-71.37	-11.9	400	5.68	lowland forest	2109.25	355.1	NA	NA	NA	NA	NA	morphospecie_56_355.1	sapling	NA	NA	NA	NA	NA	NA	NA	NA	44.74
799	56	-71.37	-11.9	400	5.68	lowland forest	2109.25	2728	NA	NA	NA	NA	NA	morphospecie_56_2728	sapling	NA	NA	NA	NA	NA	NA	NA	NA	30.492
800	56	-71.37	-11.9	400	5.68	lowland forest	2109.25	22935	NA	NA	NA	NA	NA	morphospecie_56_22935	sapling	NA	NA	NA	NA	NA	NA	NA	NA	79.88
801	56	-71.37	-11.9	400	5.68	lowland forest	2109.25	26696	NA	NA	NA	NA	NA	morphospecie_56_26696	sapling	NA	NA	NA	NA	NA	NA	NA	NA	49.298
802	56	-71.37	-11.9	400	5.68	lowland forest	2109.25	431	NA	NA	NA	NA	NA	morphospecie_56_431	sapling	NA	NA	NA	NA	NA	NA	NA	NA	32.239
803	56	-71.37	-11.9	400	5.68	lowland forest	2109.25	26638	NA	NA	NA	NA	NA	morphospecie_56_26638	sapling	NA	NA	NA	NA	NA	NA	NA	NA	53.384
804	56	-71.37	-11.9	400	5.68	lowland forest	2109.25	26639	NA	NA	NA	NA	NA	morphospecie_56_26639	sapling	NA	NA	NA	NA	NA	NA	NA	NA	66.358
805	56	-71.37	-11.9	400	5.68	lowland forest	2109.25	362.1	NA	NA	NA	NA	NA	morphospecie_56_362.1	sapling	NA	NA	NA	NA	NA	NA	NA	NA	44.684
806	56	-71.37	-11.9	400	5.68	lowland forest	2109.25	21352	NA	NA	NA	NA	NA	morphospecie_56_21352	sapling	NA	NA	NA	NA	NA	NA	NA	NA	55.918
807	56	-71.37	-11.9	400	5.68	lowland forest	2109.25	363.1	NA	NA	NA	NA	NA	morphospecie_56_363.1	sapling	NA	NA	NA	NA	NA	NA	NA	NA	38.348
808	56	-71.37	-11.9	400	5.68	lowland forest	2109.25	371.1	NA	NA	NA	NA	NA	morphospecie_56_371.1	sapling	NA	NA	NA	NA	NA	NA	NA	NA	50.293
809	57	-71.37	-11.9	400	5.68	lowland forest	2109.25	4266	NA	NA	NA	NA	NA	morphospecie_57_4266	sapling	NA	NA	NA	NA	NA	NA	NA	NA	31.983
810	57	-71.37	-11.9	400	5.68	lowland forest	2109.25	4273	NA	NA	NA	NA	NA	morphospecie_57_4273	sapling	NA	NA	NA	NA	NA	NA	NA	NA	74.201
811	57	-71.37	-11.9	400	5.68	lowland forest	2109.25	22400	NA	NA	NA	NA	NA	morphospecie_57_22400	sapling	NA	NA	NA	NA	NA	NA	NA	NA	33.867
812	57	-71.37	-11.9	400	5.68	lowland forest	2109.25	20026	NA	NA	NA	NA	NA	morphospecie_57_20026	sapling	NA	NA	NA	NA	NA	NA	NA	NA	60.427
813	57	-71.37	-11.9	400	5.68	lowland forest	2109.25	20064	NA	NA	NA	NA	NA	morphospecie_57_20064	sapling	NA	NA	NA	NA	NA	NA	NA	NA	34.368
814	57	-71.37	-11.9	400	5.68	lowland forest	2109.25	20063	NA	NA	NA	NA	NA	morphospecie_57_20063	sapling	NA	NA	NA	NA	NA	NA	NA	NA	30.548
815	57	-71.37	-11.9	400	5.68	lowland forest	2109.25	20065	NA	NA	NA	NA	NA	morphospecie_57_20065	sapling	NA	NA	NA	NA	NA	NA	NA	NA	46.667
816	57	-71.37	-11.9	400	5.68	lowland forest	2109.25	3028	NA	NA	NA	NA	NA	morphospecie_57_3028	sapling	NA	NA	NA	NA	NA	NA	NA	NA	37.263
817	57	-71.37	-11.9	400	5.68	lowland forest	2109.25	3023	NA	NA	NA	NA	NA	morphospecie_57_3023	sapling	NA	NA	NA	NA	NA	NA	NA	NA	44.74
818	57	-71.37	-11.9	400	5.68	lowland forest	2109.25	20053	NA	NA	NA	NA	NA	morphospecie_57_20053	sapling	NA	NA	NA	NA	NA	NA	NA	NA	56.72
819	57	-71.37	-11.9	400	5.68	lowland forest	2109.25	20112	NA	NA	NA	NA	NA	morphospecie_57_20112	sapling	NA	NA	NA	NA	NA	NA	NA	NA	21.191
820	57	-71.37	-11.9	400	5.68	lowland forest	2109.25	20109	NA	NA	NA	NA	NA	morphospecie_57_20109	sapling	NA	NA	NA	NA	NA	NA	NA	NA	37.41
821	57	-71.37	-11.9	400	5.68	lowland forest	2109.25	20110	NA	NA	NA	NA	NA	morphospecie_57_20110	sapling	NA	NA	NA	NA	NA	NA	NA	NA	31.125
822	57	-71.37	-11.9	400	5.68	lowland forest	2109.25	20113	NA	NA	NA	NA	NA	morphospecie_57_20113	sapling	NA	NA	NA	NA	NA	NA	NA	NA	37.294
823	58	-71.37	-11.9	400	5.68	lowland forest	2109.25	V266	NA	NA	NA	Boraginaceae	Cordia	Cordia_nodosa	sapling	NA	NA	NA	NA	NA	NA	NA	NA	66.087
824	58	-71.37	-11.9	400	5.68	lowland forest	2109.25	V260	NA	NA	NA	Rubiaceae	Posoqueria	Posoqueria_latifolia	sapling	NA	NA	NA	NA	NA	NA	NA	NA	36.171
825	58	-71.37	-11.9	400	5.68	lowland forest	2109.25	V258	NA	NA	NA	Staphyleaceae	Huertea	Huertea_glandulosa	sapling	NA	NA	NA	NA	NA	NA	NA	NA	29.93
826	58	-71.37	-11.9	400	5.68	lowland forest	2109.25	V257	NA	NA	NA	Rhamnaceae	Ziziphus	Ziziphus_cinnamomum	sapling	NA	NA	NA	NA	NA	NA	NA	NA	31.383
827	58	-71.37	-11.9	400	5.68	lowland forest	2109.25	V289	NA	NA	NA	Annonaceae	Oxandra	Oxandra_acuminata	sapling	NA	NA	NA	NA	NA	NA	NA	NA	25.421
828	58	-71.37	-11.9	400	5.68	lowland forest	2109.25	V290	NA	NA	NA	Moraceae	Pseudolmedia	Pseudolmedia_laevis	sapling	NA	NA	NA	NA	NA	NA	NA	NA	57.412
829	58	-71.37	-11.9	400	5.68	lowland forest	2109.25	V288	NA	NA	NA	Cannabaceae	Celtis	Celtis_schippii	sapling	NA	NA	NA	NA	NA	NA	NA	NA	39.307
830	58	-71.37	-11.9	400	5.68	lowland forest	2109.25	V294	NA	NA	NA	Annonaceae	Trigynaea	Trigynaea_duckei	sapling	NA	NA	NA	NA	NA	NA	NA	NA	33.168
831	58	-71.37	-11.9	400	5.68	lowland forest	2109.25	V193	NA	NA	NA	Meliaceae	Guarea	Guarea_kunthiana	sapling	NA	NA	NA	NA	NA	NA	NA	NA	48.445
832	58	-71.37	-11.9	400	5.68	lowland forest	2109.25	V189	NA	NA	NA	Piperaceae	Piper	Piper_laevigatum	sapling	NA	NA	NA	NA	NA	NA	NA	NA	37.995
833	58	-71.37	-11.9	400	5.68	lowland forest	2109.25	V166	NA	NA	NA	Malvaceae	Quararibea	Quararibea_wittii	sapling	NA	NA	NA	NA	NA	NA	NA	NA	29.377
834	58	-71.37	-11.9	400	5.68	lowland forest	2109.25	V165	NA	NA	NA	Lauraceae	Caryodaphnopsis	Caryodaphnopsis_fosteri	sapling	NA	NA	NA	NA	NA	NA	NA	NA	35.62

## Sheet: Drought_metrics
Colume Name	Definition
TLP	Turgor Loss Point
SWC	Saturated Water Content
Osmotic	Osmotic potential at full turgor
RWC	Relative Water Content
Elasticity	Bulk modulus of elasticity
CFT	Relative Capacitance at full turgor
CTLP	Relative Capacitance at zero turgor
Gmin	Cuticular Cundactance
SL	Solute Leakage
